# Supplementary material for: Aza-dicyclopenta[ a , g ]naphthalenes: controllable seesaw-like emissive behavior and narrowband AIEgens
Source: Royal Society of Chemistry journal article supplement (doi:10.1039/d3sc03921h), 2023-01-01

**Electronic Supplementary Information**

**Aza-Dicyclopenta[*a,g*]naphthalenes: Controllable Seesaw-like  
Emissive Behavior and Narrowband AIEgens**

Jinbiao Li, Jiaxin Lao, Hongbin Zou\*

College of Pharmaceutical Sciences, Zhejiang University, Hangzhou, 310058, PR China

\* Corresponding author. Tel: +8657188208451; email: zouhb@zju.edu.cn

## List of Contents

|                                                                                                  |     |
|--------------------------------------------------------------------------------------------------|-----|
| <b>I.</b> General information.....                                                               | S3  |
| <b>II.</b> Reaction conditions optimization.....                                                 | S4  |
| <b>III.</b> General procedures for the synthesis of starting materials.....                      | S5  |
| <b>IV.</b> General procedure for the synthesis of the products <b>2, 3, 4</b> and <b>5</b> ..... | S9  |
| <b>V.</b> The synthesis of the product <b>6</b> .....                                            | S20 |
| <b>VI.</b> Photophysical properties.....                                                         | S21 |
| <b>VII.</b> Cell culture and cytotoxicity test.....                                              | S29 |
| <b>VIII.</b> References.....                                                                     | S30 |
| <b>IX.</b> NMR spectroscopic data.....                                                           | S31 |

## I. General information

Unless otherwise noted, materials were purchased from commercial suppliers and used without further purification. All the solvents were treated according to general methods. Analytical thin layer chromatography (TLC) was performed on Merck precoated silica gel 60 F<sub>254</sub>. Visualization on TLC was achieved by the use of UV light (254 nm). Solvents mixtures were understood as volume/volume. Purifications of reaction products were carried out by chromatography using silica gel (200–300 mesh). NMR spectra were mostly recorded for <sup>1</sup>H NMR at 500 MHz and for <sup>13</sup>C NMR at 125 MHz. For <sup>1</sup>H NMR, tetramethylsilane (TMS) served as internal standard ( $\delta$ ). The spectra data presented here are reported as follows: chemical shift, integration, multiplicity (s = singlet, d = doublet, t = triplet, q = quartet, m = multiplet), and coupling constant (s) in Hertz. For <sup>13</sup>C NMR TMS ( $\delta$  = 0) was used as internal standard and spectra were obtained with complete proton decoupling. HRMS was obtained using ESI ionization. UV-Visible absorption spectra were measured using Shimadzu UV-1800 spectrophotometer. Fluorescence spectra were measured on a Shimadzu RF-5301PC spectrometer with a slit width 5 nm for emission. Size distribution was determined on a DLS using a Mastersizer 3000. Morphology was observed on a S4 JEM-F200 transmission electron microscope. Powder X-ray diffraction was observed on a Bruker D8 ADVANCE. Laser confocal scanning microscope images were collected on a confocal laser scanning microscope (CLSM, ZEISS-LSM880). The water/DMSO mixtures with different water fractions were prepared by slowly adding distilled water into the DMSO solution of samples under ultrasound at room temperature. Fluorescence quantum yields of compounds in solution and in aggregation state were measured on Absolutely Photoluminescence Quantum Yield Measurement System (HAMAMARSU, C11347-11Quantaaurus-QY).

## II. Reaction conditions optimization

**Table S1:** Details for the optimization of the reaction condition.

| 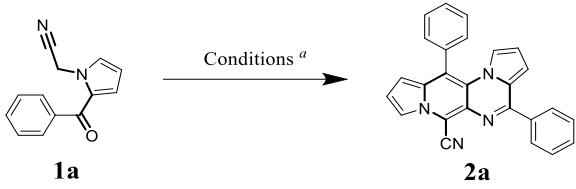 |                                |                    |                   |               |                    |
|------------------------------------------------------------------------------------|--------------------------------|--------------------|-------------------|---------------|--------------------|
| Entry                                                                              | Base                           | Solvent            | Temp. (°C)        | Time          | Yield <sup>b</sup> |
| 1                                                                                  | DABCO                          | DMF                | r.t. <sup>c</sup> | 2 h           | 0                  |
| 2                                                                                  | Et <sub>3</sub> N              | DMF                | r.t.              | 2 h           | 0                  |
| 3                                                                                  | DBU                            | DMF                | r.t.              | 2 h           | < 5%               |
| 4                                                                                  | K <sub>2</sub> CO <sub>3</sub> | DMF                | r.t.              | 2 h           | 0                  |
| 5                                                                                  | CH <sub>3</sub> ONa            | DMF                | r.t.              | 2 h           | 12%                |
| 6                                                                                  | <sup>t</sup> BuOLi             | DMF                | r.t.              | 2 h           | 0                  |
| 7                                                                                  | <sup>t</sup> BuONa             | DMF                | r.t.              | 2 h           | < 5%               |
| 8                                                                                  | <sup>t</sup> BuOK              | DMF                | r.t.              | 2 h           | 23%                |
| 9                                                                                  | <sup>t</sup> BuOK              | CH <sub>3</sub> CN | r.t.              | 2 h           | 35%                |
| 10                                                                                 | <sup>t</sup> BuOK              | EtOH               | r.t.              | 2 h           | < 5%               |
| 11                                                                                 | <sup>t</sup> BuOK              | THF                | r.t.              | 2 h           | 57%                |
| 12                                                                                 | <sup>t</sup> BuOK              | DMSO               | r.t.              | 2 h           | 22%                |
| 13                                                                                 | <sup>t</sup> BuOK              | DCM                | r.t.              | 2 h           | < 5%               |
| 14                                                                                 | <sup>t</sup> BuOK              | Toluene            | r.t.              | 2 h           | 0                  |
| 15                                                                                 | <sup>t</sup> BuOK              | THF                | 40                | 2 h           | 29%                |
| 16                                                                                 | <sup>t</sup> BuOK              | THF                | -5                | 2 h           | 48%                |
| 17                                                                                 | <sup>t</sup> BuOK              | THF                | r.t.              | 1 h           | 64%                |
| 18                                                                                 | <sup>t</sup> BuOK              | THF                | r.t.              | 5 min         | 41%                |
| 19                                                                                 | <b><sup>t</sup>BuOK</b>        | <b>THF</b>         | <b>r.t.</b>       | <b>30 min</b> | <b>76%</b>         |

<sup>a</sup> Reaction conditions: **1a** (0.2 mmol, 1.0 equiv.), base (2.0 equiv.), solvent (2 mL), under N<sub>2</sub>; <sup>b</sup> Isolated yield; <sup>c</sup> Room temperature.

Details of the investigated reaction condition optimization were presented here. We embarked upon the optimization of intermolecular cascade condensation by using 2-(2-benzoyl-1*H*-pyrrol-1-yl)acetonitrile as the model substrate. The base and the solvent were found to play a key role in the reaction. After screening a range of bases, we centered on <sup>t</sup>BuOK which produced the best overall yield of **2a** in the presence of DMF at room temperature (Table S1, entries 1–8). Various solvents were then examined and THF turned out to be the most favorable one (Table S1, entries 8–14). The reaction temperature was gradually increased from -5 to 40 °C and the results showed that it was also a key role in the reaction yield (Table S1, entries 11, 15 and 16). Different reaction time, from 5 minutes to 2 hours, was also tested, and the results indicated that longer or shorter reaction time than 30 minutes would diminish the reaction yields (Table S1, entries 11 and 17–19). Therefore, the reaction was found to produce the desired product **2a** most efficiently under the catalysis of <sup>t</sup>BuOK in THF at room temperature for 30 minutes (Table S1, entry 19).

### III. General procedures for the synthesis of starting materials

#### A) The synthetic routes for pyrrole derivatives.

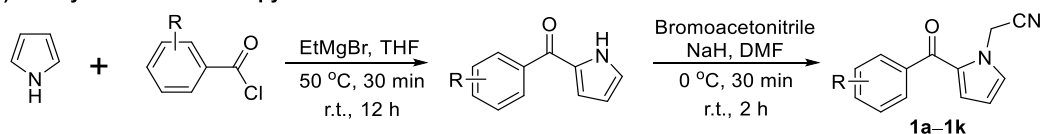

#### B) The synthetic routes for imidazole derivatives.

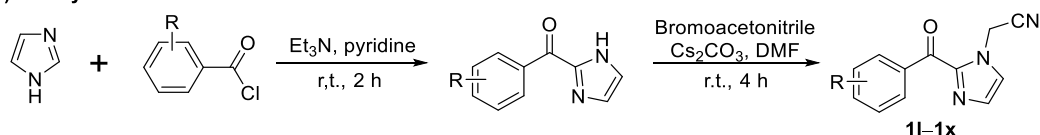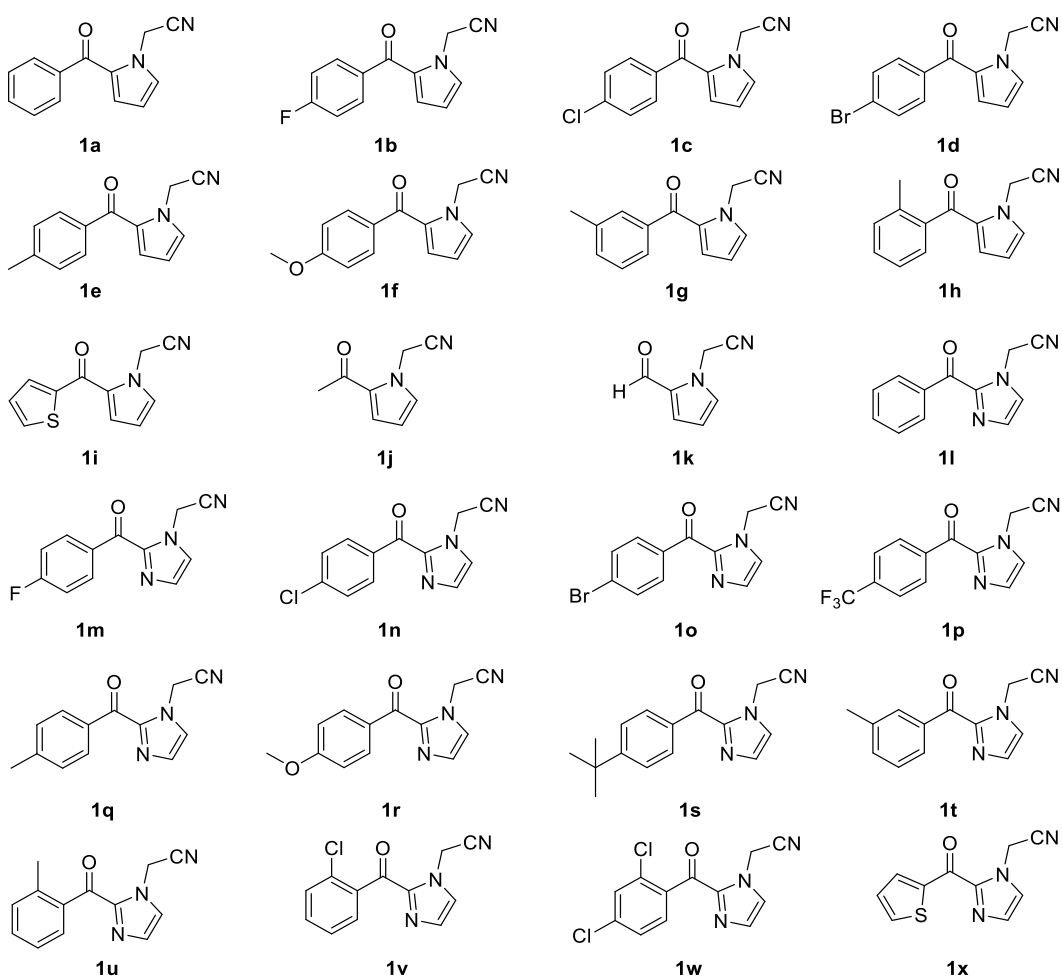

**Scheme S1.** The synthetic routes for starting materials.

**General procedures A: the synthetic routes for pyrrole derivatives.** To a freshly prepared solution of ethyl magnesium in diethyl ether (3.0 M, 4 mL) was added dropwise a solution of pyrrole (0.603 g, 9.0 mmol) in diethyl ether (4 mL) under 50 °C. The mixture was refluxed for a further 30 minutes. Then the reaction mixture was cooled to room temperature, and corresponding acid chloride (10.8 mmol, 1.2 equiv) dissolved in tetrahydrofuran (10 mL) was added dropwise over a period of 20 minutes. The solution was stirred overnight. The reaction mixture was then poured into a concentrated aqueous ammonium chloride solution (20 mL), and extracted with dichloromethane

(20 mL  $\times$  3). The organic layer was washed with water (10 mL  $\times$  3), dried with Na<sub>2</sub>SO<sub>4</sub>, filtered and evaporated. The crude material was purified by flash chromatography (hexane: EtOAc = 10:1) to give the desired product 2-ketopyrrole.<sup>1</sup> The substrate 2-ketopyrrole (4.0 mmol 1.0 equiv.) was dissolved in anhydrous DMF (20 mL), and NaH (60% in mineral oil, 230 mg, 4.8 mmol, 1.2 equiv.) was added under 0 °C. The solution was stirred under 0 °C for a further 30 minutes. Then bromoacetonitrile (571 mg, 4.8 mmol, 1.2 eq) dissolved in DMF (5 mL) was added dropwise. The reaction mixture was warmed to room temperature and stirred for 2 hours. Then it was added dropwise to ice water (150 mL) and the desired product precipitated from the mixture. It was then filtered and the residue was recrystallized from ethanol to give the desired products (Scheme S1A).

**General procedures B: the synthetic routes for imidazole derivatives.** Imidazole (6.80 g, 0.1 mol) was dissolved in pyridine (14 mL), and triethylamine (41.8 mL, 0.3 mol) was added. The reaction mixture was cooled with an ice bath. The corresponding aryl chloride (0.30 mol) was added dropwise under cooling, then the mixture was stirred at room temperature for 2 hours. Aqueous NaOH solution (40 w/w%, 20 mL) was carefully added, and the mixture was refluxed for 1 hours. The reaction mixture was poured into cold water (200 mL), and the precipitated solid was filtered, washed with water and dried at 70 °C. These compounds have been described in the literature earlier.<sup>2</sup> The 2-aryl-imidazoles (4.0 mmol 1.0 equiv.) were dissolved in CH<sub>3</sub>CN (10 mL) and CH<sub>2</sub>Cl<sub>2</sub> (20 mL), and Cs<sub>2</sub>CO<sub>3</sub> (1.56 g, 4.8 mmol, 1.2 equiv.) was added under room temperature. Then bromoacetonitrile (571 mg, 4.8 mmol, 1.2 eq) was added dropwise. The reaction mixture was stirred for further 4 hours. Then it was filtered and the filtrate was concentrated under reduced pressure. The residue was recrystallized from ethanol to give the desired products (Scheme S1B).

Unless otherwise noted, all reagents and solvents purchased from commercial sources were used without further purification. The compounds **1a–1f**, **1j**, **1k** have been described in the literature earlier<sup>3</sup> and our previous research.

#### 2-(2-(3-Methylbenzoyl)-1H-pyrrol-1-yl)acetonitrile (**1g**)

Following the general procedures A, **1g** was obtained as white solid (797 mg, 89% yield). <sup>1</sup>H NMR (500 MHz, CDCl<sub>3</sub>): 7.79 (1H, d, *J* = 7.5 Hz), 7.67 (1H, dd, *J* = 7.5, 2.5 Hz), 7.41 (2H, m), 7.23 (1H, dd, *J* = 3.0, 0.5 Hz), 6.89 (1H, dd, *J* = 4.0, 0.5 Hz), 6.47 (1H, dd, *J* = 4.0, 2.5 Hz), 5.39 (2H, s), 2.29 (3H, s); <sup>13</sup>C NMR (125 MHz, CDCl<sub>3</sub>):  $\delta$  186.23, 140.59, 134.71, 133.49, 131.52, 129.37, 127.35, 125.49, 124.57, 122.78, 116.63, 111.17, 38.45, 22.14; HRMS (ESI) *m/z* calcd. for C<sub>14</sub>H<sub>12</sub>N<sub>2</sub>O [M+H]<sup>+</sup> 225.1028, found 225.1032.

#### 2-(2-(2-Methylbenzoyl)-1H-pyrrol-1-yl)acetonitrile (**1h**)

Following the general procedures A, **1h** was obtained as white solid (771 mg, 86% yield). <sup>1</sup>H NMR (500 MHz, CDCl<sub>3</sub>): 7.82 (1H, dd, *J* = 8.0, 1.0 Hz), 7.54 (1H, dd, *J* = 8.5, 6.5 Hz), 7.34 (2H, m), 7.21 (1H, dd, *J* = 3.0, 1.0 Hz), 6.92 (1H, dd, *J* = 4.0, 1.0 Hz), 6.44 (1H, dd, *J* = 4.0, 3.0 Hz), 5.37 (2H, s), 2.31 (3H, s); <sup>13</sup>C NMR (125 MHz, CDCl<sub>3</sub>):  $\delta$  187.81, 141.76, 137.97, 136.54, 131.68, 131.24, 130.85, 130.62, 126.08, 123.15, 115.36, 112.64, 36.57, 22.37; HRMS (ESI) *m/z* calcd. for C<sub>14</sub>H<sub>12</sub>N<sub>2</sub>O [M+H]<sup>+</sup> 225.1028, found 225.1032.

#### 2-(2-(Thiophene-2-carbonyl)-1H-pyrrol-1-yl)acetonitrile (**1i**)

Following the general procedures A, **1i** was obtained as white solid (778 mg, 90% yield). <sup>1</sup>H NMR

(500 MHz, CDCl<sub>3</sub>):  $\delta$  7.78 (1H, dd,  $J$  = 4.0, 1.0 Hz), 7.56 (1H, dd,  $J$  = 5.0, 1.0 Hz), 7.34 (1H, dd,  $J$  = 3.5, 0.5 Hz), 7.21 (1H, dd,  $J$  = 5.0, 4.0 Hz), 6.91 (1H, dd,  $J$  = 4.0, 1.0 Hz), 6.47 (1H, dd,  $J$  = 4.0, 3.0 Hz), 5.53 (2H, s); <sup>13</sup>C NMR (125 MHz, CDCl<sub>3</sub>):  $\delta$  175.16, 141.46, 140.70, 137.10, 136.43, 130.49, 128.24, 125.25, 113.88, 111.43, 36.36; HRMS (ESI)  $m/z$  calcd. for C<sub>11</sub>H<sub>8</sub>N<sub>2</sub>OS [M+H]<sup>+</sup> 217.0436, found 217.0439.

#### 2-(2-Benzoyl-1H-imidazol-1-yl)acetonitrile (**1l**)

Following the general procedures B, **1l** was obtained as white solid (768 mg, 91% yield). <sup>1</sup>H NMR (500 MHz, CDCl<sub>3</sub>):  $\delta$  8.33 (2H, d,  $J$  = 7.5 Hz), 7.60 (1H, t,  $J$  = 8.0 Hz), 7.49 (2H, t,  $J$  = 8.0 Hz), 7.32 (1H, d,  $J$  = 1.0 Hz), 7.30 (1H, d,  $J$  = 1.0 Hz), 5.45 (2H, s); <sup>13</sup>C NMR (125 MHz, CDCl<sub>3</sub>):  $\delta$  183.93, 142.14, 136.25, 133.47, 131.01, 130.46, 128.31, 125.32, 114.10, 36.56.; HRMS (ESI)  $m/z$  calcd. for C<sub>12</sub>H<sub>9</sub>N<sub>3</sub>O [M+H]<sup>+</sup> 212.0824, found 212.0826.

#### 2-(2-(4-Fluorobenzoyl)-1H-imidazol-1-yl)acetonitrile (**1m**)

Following the general procedures B, **1m** was obtained as white solid (797 mg, 87% yield). <sup>1</sup>H NMR (500 MHz, CDCl<sub>3</sub>):  $\delta$  8.48 (2H, dd,  $J$  = 9.0, 5.5 Hz), 7.35 (1H, d,  $J$  = 1.0 Hz), 7.34 (1H, d,  $J$  = 1.0 Hz), 7.18 (2H, dd,  $J$  = 9.0, 8.0 Hz), 5.49 (2H, s); <sup>13</sup>C NMR (125 MHz, CDCl<sub>3</sub>):  $\delta$  182.13, 166.11 (<sup>1</sup> $J_{C-F}$  = 254 Hz), 141.98, 133.84 (<sup>3</sup> $J_{C-F}$  = 9 Hz), 132.47 (<sup>4</sup> $J_{C-F}$  = 3 Hz), 130.50, 125.29, 115.52 (<sup>2</sup> $J_{C-F}$  = 22 Hz), 113.90, 36.63; HRMS (ESI)  $m/z$  calcd. for C<sub>12</sub>H<sub>8</sub>FN<sub>3</sub>O [M+H]<sup>+</sup> 230.0730, found 230.0736.

#### 2-(2-(4-Chlorobenzoyl)-1H-imidazol-1-yl)acetonitrile (**1n**)

Following the general procedures B, **1n** was obtained as white solid (823 mg, 84% yield). <sup>1</sup>H NMR (500 MHz, CDCl<sub>3</sub>):  $\delta$  8.37 (2H, d,  $J$  = 8.5 Hz), 7.48 (2H, d,  $J$  = 8.5 Hz), 7.34 (2H, s), 5.48 (2H, s); <sup>13</sup>C NMR (125 MHz, CDCl<sub>3</sub>): 184.73, 142.45, 132.64, 131.96, 130.32, 129.17, 128.05, 124.37, 113.15, 36.09; HRMS (ESI)  $m/z$  calcd. for C<sub>12</sub>H<sub>8</sub>ClN<sub>3</sub>O [M+H]<sup>+</sup> 246.0434, found 246.0436.

#### 2-(2-(4-Bromobenzoyl)-1H-imidazol-1-yl)acetonitrile (**1o**)

Following the general procedures B, **1o** was obtained as white solid (1017 mg, 88% yield). <sup>1</sup>H NMR (500 MHz, CDCl<sub>3</sub>):  $\delta$  8.27 (2H, d,  $J$  = 8.5 Hz), 7.65 (2H, d,  $J$  = 8.5 Hz), 7.34 (2H, s), 5.47 (2H, s); <sup>13</sup>C NMR (125 MHz, CDCl<sub>3</sub>): 181.61, 140.84, 133.86, 131.56, 130.60, 129.58, 127.93, 124.42, 112.81, 35.60; HRMS (ESI)  $m/z$  calcd. for C<sub>12</sub>H<sub>8</sub>BrN<sub>3</sub>O [M+H]<sup>+</sup> 289.9929, found 289.9931.

#### 2-(2-(4-(Trifluoromethyl)benzoyl)-1H-imidazol-1-yl)acetonitrile (**1p**)

Following the general procedures B, **1p** was obtained as white solid (949 mg, 85% yield). <sup>1</sup>H NMR (500 MHz, CDCl<sub>3</sub>):  $\delta$  8.47 (2H, d,  $J$  = 8.0 Hz), 7.77 (2H, d,  $J$  = 8.0 Hz), 7.38 (2H, m), 5.51 (2H, s); <sup>13</sup>C NMR (125 MHz, CDCl<sub>3</sub>):  $\delta$  182.80, 141.74, 139.08, 134.50 (<sup>2</sup> $J_{C-F}$  = 33 Hz), 131.31, 130.92, 125.29, 125.25 (<sup>3</sup> $J_{C-F}$  = 4 Hz), 123.67, 125.25 (<sup>1</sup> $J_{C-F}$  = 275 Hz), 113.71, 36.67; HRMS (ESI)  $m/z$  calcd. for C<sub>13</sub>H<sub>8</sub>F<sub>3</sub>N<sub>3</sub>O [M+H]<sup>+</sup> 280.0698, found 280.0701

#### 2-(2-(4-Methylbenzoyl)-1H-imidazol-1-yl)acetonitrile (**1q**)

Following the general procedures B, **1q** was obtained as white solid (846 mg, 94% yield). <sup>1</sup>H NMR (500 MHz, CDCl<sub>3</sub>):  $\delta$  7.82 (2H, d,  $J$  = 9.0 Hz), 7.35 (2H, d,  $J$  = 9.0 Hz), 7.33 (1H, d,  $J$  = 1.0 Hz),

7.31 (1H, d,  $J = 1.0$  Hz), 5.52 (2H, s), 2.41 (3H, s);  $^{13}\text{C}$  NMR (125 MHz,  $\text{CDCl}_3$ ):  $\delta$  187.25, 151.28, 141.32, 135.57, 130.09, 128.73, 123.67, 114.21, 113.57, 37.36, 21.47; HRMS (ESI)  $m/z$  calcd. for  $\text{C}_{13}\text{H}_{11}\text{N}_3\text{O}$   $[\text{M}+\text{H}]^+$  226.0980, found 226.0984.

#### 2-(2-(4-Methoxybenzoyl)-1H-imidazol-1-yl)acetonitrile (**1r**)

Following the general procedures B, **1r** was obtained as white solid (877 mg, 91% yield).  $^1\text{H}$  NMR (500 MHz,  $\text{CDCl}_3$ ):  $\delta$  8.44 (2H, d,  $J = 9.0$  Hz), 7.33 (1H, d,  $J = 1.0$  Hz), 7.31 (1H, d,  $J = 1.0$  Hz), 6.99 (2H, d,  $J = 9.0$  Hz), 5.48 (2H, s), 3.90 (3H, s);  $^{13}\text{C}$  NMR (125 MHz,  $\text{CDCl}_3$ ):  $\delta$  182.19, 164.05, 142.41, 133.61, 130.14, 129.01, 124.77, 114.13, 113.66, 55.55, 36.48; HRMS (ESI)  $m/z$  calcd. for  $\text{C}_{13}\text{H}_{11}\text{N}_3\text{O}_2$   $[\text{M}+\text{H}]^+$  242.0930, found 242.0933.

#### 2-(2-(4-(Tert-butyl)benzoyl)-1H-imidazol-1-yl)acetonitrile (**1s**)

Following the general procedures B, **1s** was obtained as white solid (961 mg, 90% yield).  $^1\text{H}$  NMR (500 MHz,  $\text{CDCl}_3$ ):  $\delta$  8.27 (2H, d,  $J = 7.0$  Hz), 7.53 (2H, d,  $J = 7.0$  Hz), 7.33 (1H, d,  $J = 0.5$  Hz), 7.32 (1H, d,  $J = 0.5$  Hz), 5.49 (2H, s), 1.35 (9H, s);  $^{13}\text{C}$  NMR (125 MHz,  $\text{CDCl}_3$ ):  $\delta$  183.74, 157.32, 142.31, 133.61, 130.95, 130.39, 125.37, 124.99, 114.04, 36.48, 35.20, 31.06; HRMS (ESI)  $m/z$  calcd. for  $\text{C}_{16}\text{H}_{17}\text{N}_3\text{O}$   $[\text{M}+\text{H}]^+$  268.1450, found 268.1455.

#### 2-(2-(3-Methylbenzoyl)-1H-imidazol-1-yl)acetonitrile (**1t**)

Following the general procedures B, **1t** was obtained as white solid (801 mg, 89% yield).  $^1\text{H}$  NMR (500 MHz,  $\text{CDCl}_3$ ):  $\delta$  7.73 (1H, dd,  $J = 8.0, 1.5$  Hz), 7.43 (1H, ddd,  $J = 8.0, 7.0, 1.0$  Hz), 7.33 (1H, d,  $J = 1.0$  Hz), 7.31 (1H, d,  $J = 1.0$  Hz), 7.30 (1H, m), 7.29 (1H, m), 5.54 (2H, s), 2.44 (3H, s);  $^{13}\text{C}$  NMR (125 MHz,  $\text{CDCl}_3$ ):  $\delta$  187.92, 142.65, 138.07, 136.47, 131.55, 131.36, 130.93, 130.56, 125.28, 125.18, 113.87, 36.41, 20.33; HRMS (ESI)  $m/z$  calcd. for  $\text{C}_{13}\text{H}_{11}\text{N}_3\text{O}$   $[\text{M}+\text{H}]^+$  226.0980, found 226.0984.

#### 2-(2-(2-Methylbenzoyl)-1H-imidazol-1-yl)acetonitrile (**1u**)

Following the general procedures B, **1u** was obtained as white solid (774 mg, 86% yield).  $^1\text{H}$  NMR (500 MHz,  $\text{CDCl}_3$ ):  $\delta$  7.33 (1H, td,  $J = 8.5, 1.0$  Hz), 7.27 (1H, d,  $J = 7.0$  Hz), 7.22 (2H, m), 7.18 (2H, m), 5.56 (2H, s), 2.27 (3H, s);  $^{13}\text{C}$  NMR (125 MHz,  $\text{CDCl}_3$ ):  $\delta$  187.92, 143.10, 135.73, 132.93, 130.90, 130.40, 129.22, 126.88, 125.92, 119.48, 114.32, 113.82, 34.26. HRMS (ESI)  $m/z$  calcd. for  $\text{C}_{13}\text{H}_{11}\text{N}_3\text{O}$   $[\text{M}+\text{H}]^+$  226.0980, found 226.0983.

#### 2-(2-(2-Chlorobenzoyl)-1H-imidazol-1-yl)acetonitrile (**1v**)

Following the general procedures B, **1v** was obtained as white solid (862 mg, 88% yield).  $^1\text{H}$  NMR (500 MHz,  $\text{CDCl}_3$ ):  $\delta$  7.60 (1H, ddd,  $J = 7.5, 1.5, 0.5$  Hz), 7.46 (2H, m), 7.38 (2H, m), 7.30 (1H, d,  $J = 1.0$  Hz), 5.53 (2H, s);  $^{13}\text{C}$  NMR (125 MHz,  $\text{CDCl}_3$ ):  $\delta$  185.39, 142.00, 136.81, 132.07, 131.98, 131.50, 130.36, 130.18, 126.48, 125.79, 113.66, 36.27; HRMS (ESI)  $m/z$  calcd. for  $\text{C}_{12}\text{H}_8\text{ClN}_3\text{O}$   $[\text{M}+\text{H}]^+$  246.0434, found 246.0440.

#### 2-(2-(2,4-Dichlorobenzoyl)-1H-imidazol-1-yl)acetonitrile (**1w**)

Following the general procedures B, **1w** was obtained as white solid (915 mg, 82% yield).  $^1\text{H}$  NMR (500 MHz,  $\text{CDCl}_3$ ):  $\delta$  7.58 (1H, d,  $J = 8.5$  Hz), 7.49 (1H, d,  $J = 2.0$  Hz), 7.37 (2H, m), 7.32 (1H, d,

$J = 1.0$  Hz), 5.53 (2H, s);  $^{13}\text{C}$  NMR (125 MHz,  $\text{CDCl}_3$ ):  $\delta$  184.18, 141.77, 137.78, 135.03, 133.18, 131.59, 131.34, 130.36, 126.88, 125.97, 113.51, 36.29; HRMS (ESI)  $m/z$  calcd. for  $\text{C}_{12}\text{H}_7\text{Cl}_2\text{N}_3\text{O}$   $[\text{M}+\text{H}]^+$  280.0044, found 280.0048.

#### 2-(2-(Thiophene-2-carbonyl)-1H-imidazol-1-yl)acetonitrile (**1x**)

Following the general procedures B, **1x** was obtained as white solid (729 mg, 84% yield).  $^1\text{H}$  NMR (500 MHz,  $\text{CDCl}_3$ ):  $\delta$  8.56 (1H, dd,  $J = 4.0, 1.0$  Hz), 7.78 (1H, dd,  $J = 5.0, 1.0$  Hz), 7.34 (1H, d,  $J = 0.5$  Hz), 7.32 (1H, d,  $J = 0.5$  Hz), 7.21 (1H, dd,  $J = 5.0, 4.0$  Hz), 5.53 (2H, s);  $^{13}\text{C}$  NMR (125 MHz,  $\text{CDCl}_3$ ):  $\delta$  175.16, 141.46, 140.70, 137.10, 136.43, 130.49, 128.24, 125.25, 113.88, 36.36; HRMS (ESI)  $m/z$  calcd. for  $\text{C}_{10}\text{H}_7\text{N}_3\text{OS}$   $[\text{M}+\text{H}]^+$  218.0388, found 218.0384.

## IV. General procedure for the synthesis of the products 2, 3, 4 and 5

**The general procedure for the products 2 and 3:**  $t\text{BuOK}$  (45 mg, 0.4 mmol, 2.0 equiv.) was added to the solution of **1** (0.2 mmol, 1.0 equiv.) in THF (2 mL) under  $\text{N}_2$ . The mixture was stirred under room temperature for 30 minutes. Then the reaction mixture was concentrated under reduced pressure. The residue was purified by column chromatography on silica gel to obtain the desired product **2** or **3** (Scheme S2).

**The general procedure for the products 4 and 5:** Iodine or bromo substitutes (0.2 mmol, 2.0 equiv.) was added to the solution of **3** (0.1 mmol, 1.0 equiv.) in  $\text{CH}_3\text{CN}$  (2 mL) in sealed tube. The mixture was stirred under 120  $^\circ\text{C}$  for 12 hours. Then the reaction mixture was concentrated under reduced pressure. The residue was washed by ethyl acetate for three times, it was then filtered and obtain the the residue as desired product **4** or **5** (Scheme S2).

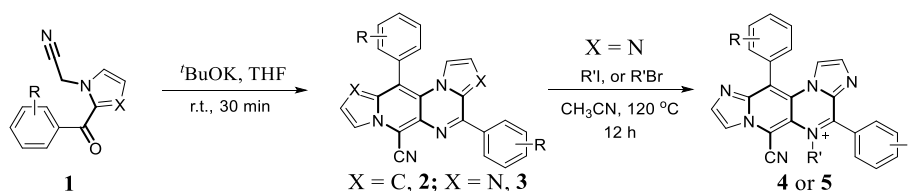

**Scheme S2.** The synthetic routes for the products **2**, **3**, **4** and **5**.

**The synthetic routes for 4-(2-iodoethyl)morpholine:** 4-(2-Chloroethyl)morpholine hydrochloride (5 g, 0.0269 mol) and sodium iodide (20 g, 0.1334 mol) were placed in acetone (50 mL) and refluxed for 16 h. Chloroform (50 mL) and brine solution (50 mL) were then added and the mixture stirred for 10 min. The solid was removed by filtration and added to a mixture of chloroform (50 mL) and saturated sodium bicarbonate solution (50 mL). The mixture was stirred for 5 min and the organic layer was removed. The aqueous layer was then extracted with additional chloroform ( $2 \times 25$  mL). The organic layers were combined, washed with brine, and dried over sodium sulfate. The solvent was removed under reduced pressure to give the title product as a yellow oil, which was used without further purification (Scheme S3).<sup>4</sup>

**The synthetic routes for (4-iodobutyl)triphenylphosphonium iodide:** 1,4-Diiodobutane (1.0 mmol) and triphenylphosphine (0.9 mmol) were dissolved in dry hexane (20 mL). The reaction mixture was flushed with argon and stirred at room temperature for 24 h. The white precipitate was suction filtered and dried in a vacuum desiccator. The target compounds were highly hygroscopic and were used without further purification (Scheme S3).<sup>5</sup>

a) The synthetic routes for 4-(2-iodoethyl)morpholine.

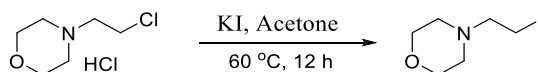

b) The synthetic routes for (4-iodobutyl)triphenylphosphonium iodide.

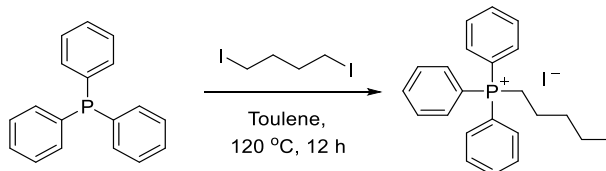

**Scheme S3.** The synthetic routes for the iodine substitutes.

Unless otherwise noted, all iodine and bromo substitutes purchased from commercial sources were used without further purification. The compounds 4-(2-iodoethyl)morpholine and (4-iodobutyl)triphenylphosphonium iodide have been described in the literature earlier (Scheme S3).

4,11-Diphenylpyrrolo[1',2':4,5]pyrazino[2,3-f]indolizine-6-carbonitrile (**2a**)

Following the general procedures, **1a** was used as the starting material and **2a** was obtained as red solid, yield 76%. <sup>1</sup>H NMR (500 MHz, CDCl<sub>3</sub>): δ 8.07 (2H, m), 7.89 (1H, dd, *J* = 2.5, 1.5 Hz), 7.64 (3H, m), 7.56 (3H, m), 7.50 (2H, m), 7.03 (1H, dd, *J* = 4.0, 2.5 Hz), 6.95 (1H, dd, *J* = 4.0, 1.5 Hz), 6.67 (1H, dd, *J* = 3.0, 1.5 Hz), 6.38 (1H, dd, *J* = 4.0, 2.5 Hz), 6.25 (1H, dd, *J* = 4.0, 1.5 Hz); <sup>13</sup>C NMR (125 MHz, CDCl<sub>3</sub>): δ 157.10, 137.20, 135.44, 135.18, 132.68, 130.73, 129.92, 129.50, 129.24, 129.07, 128.59, 125.06, 122.67, 121.77, 117.50, 116.85, 113.84, 113.64, 112.79, 112.71, 106.31, 103.76; HRMS (ESI) *m/z* calcd. for C<sub>26</sub>H<sub>16</sub>N<sub>4</sub> [M+H]<sup>+</sup> 385.1453, found 385.1457.

4,11-Bis(4-fluorophenyl)pyrrolo[1',2':4,5]pyrazino[2,3-f]indolizine-6-carbonitrile (**2b**)

Following the general procedures, **1b** was used as the starting material and **2b** was obtained as red solid, yield 61%. <sup>1</sup>H NMR (500 MHz, CDCl<sub>3</sub>): δ 8.09 (2H, m), 7.89 (1H, dd, *J* = 2.5, 1.5 Hz), 7.50 (2H, m), 7.35 (2H, tt, *J* = 9.0, 2.0 Hz), 7.24 (2H, tt, *J* = 9.0, 2.0 Hz), 7.04 (1H, dd, *J* = 4.0, 2.5 Hz), 6.93 (1H, dd, *J* = 4.0, 2.5 Hz), 6.70 (1H, dd, *J* = 2.5, 1.5 Hz), 6.43 (1H, dd, *J* = 4.0, 3.0 Hz), 6.24 (1H, dd, *J* = 4.0, 1.5 Hz); <sup>13</sup>C NMR (125 MHz, CDCl<sub>3</sub>): δ 162.91 (<sup>1</sup>*J*<sub>C-F</sub> = 137 Hz), 155.92, 135.16, 133.26, 133.24, 132.61, 131.33 (<sup>3</sup>*J*<sub>C-F</sub> = 8 Hz), 131.08 (<sup>3</sup>*J*<sub>C-F</sub> = 8 Hz), 130.96, 124.93, 122.58, 120.62, 117.18 (<sup>2</sup>*J*<sub>C-F</sub> = 33 Hz), 117.14, 115.73 (<sup>2</sup>*J*<sub>C-F</sub> = 22 Hz), 113.85, 113.66, 113.07, 112.64, 103.72; HRMS (ESI) *m/z* calcd. for C<sub>26</sub>H<sub>14</sub>F<sub>2</sub>N<sub>4</sub> [M+H]<sup>+</sup> 421.1265, found 421.1268.

4,11-Bis(4-chlorophenyl)pyrrolo[1',2':4,5]pyrazino[2,3-f]indolizine-6-carbonitrile (**2c**)

Following the general procedures, **1c** was used as the starting material and **2c** was obtained as red solid, yield 79%. <sup>1</sup>H NMR (500 MHz, CDCl<sub>3</sub>): δ 7.93 (2H, tt, *J* = 8.5, 2.0 Hz), 7.80 (1H, dd, *J* = 2.5, 1.5 Hz), 7.55 (2H, tt, *J* = 8.5, 2.0 Hz), 7.44 (2H, tt, *J* = 8.5, 2.0 Hz), 7.38 (2H, tt, *J* = 8.5, 2.0 Hz), 6.96 (1H, dd, *J* = 4.0, 2.5 Hz), 6.84 (1H, dd, *J* = 4.0, 1.5 Hz), 6.66 (1H, dd, *J* = 3.0, 3.0 Hz), 6.36 (1H, dd, *J* = 4.0, 3.0 Hz), 6.16 (1H, dd, *J* = 4.0, 1.5 Hz); <sup>13</sup>C NMR (125 MHz, CDCl<sub>3</sub>): δ 155.80, 136.98, 135.77, 135.47, 135.00, 133.50, 132.33, 130.77, 130.31, 128.89, 124.79, 122.68, 120.35, 117.46, 117.16, 113.89, 113.54, 113.21, 112.60, 106.65, 103.77.; HRMS (ESI) *m/z* calcd. for C<sub>26</sub>H<sub>14</sub>Cl<sub>2</sub>N<sub>4</sub> [M+H]<sup>+</sup> 453.0674, found 453.0676.

#### 4,11-Bis(4-bromophenyl)pyrrolo[1',2':4,5]pyrazino[2,3-f]indolizine-6-carbonitrile (**2d**)

Following the general procedures, **1d** was used as the starting material and **2d** was obtained as red solid, yield 54%. <sup>1</sup>H NMR (500 MHz, CDCl<sub>3</sub>): δ 7.94 (2H, tt, *J* = 8.0, 1.5 Hz), 7.87 (1H, dd, *J* = 2.5, 1.5 Hz), 7.79 (2H, tt, *J* = 8.0, 2.0 Hz), 7.67 (2H, tt, *J* = 8.0, 2.0 Hz), 7.39 (2H, tt, *J* = 8.0, 2.0 Hz), 7.04 (1H, dd, *J* = 4.0, 2.5 Hz), 6.90 (1H, dd, *J* = 4.0, 1.5 Hz), 6.74 (1H, dd, *J* = 3.0, 3.0 Hz), 6.45 (1H, dd, *J* = 4.0, 3.0 Hz), 6.24 (1H, dd, *J* = 4.0, 1.5 Hz); <sup>13</sup>C NMR (125 MHz, CDCl<sub>3</sub>): δ 155.88, 135.92, 134.99, 134.00, 133.26, 132.23, 131.86, 131.03, 130.52, 125.39, 124.74, 123.92, 122.70, 120.33, 117.39, 117.18, 113.91, 113.53, 113.24, 112.60, 106.69, 103.79; HRMS (ESI) *m/z* calcd. for C<sub>26</sub>H<sub>14</sub>Br<sub>2</sub>N<sub>4</sub> [M+H]<sup>+</sup> 540.9663, found 540.9665.

#### 4,11-Di-p-tolylpyrrolo[1',2':4,5]pyrazino[2,3-f]indolizine-6-carbonitrile (**2e**)

Following the general procedures, **1e** was used as the starting material and **2e** was obtained as red solid, yield 81%. <sup>1</sup>H NMR (500 MHz, CDCl<sub>3</sub>): δ 7.98 (2H, d, *J* = 8.0 Hz), 7.87 (1H, dd, *J* = 3.0, 1.5 Hz), 7.44 (2H, d, *J* = 8.0 Hz), 7.38 (2H, d, *J* = 8.0 Hz), 7.35 (2H, d, *J* = 7.5 Hz), 7.01 (1H, dd, *J* = 4.0, 3.0 Hz), 6.95 (1H, dd, *J* = 4.0, 1.0 Hz), 6.73 (1H, dd, *J* = 3.0, 1.5 Hz), 6.38 (1H, dd, *J* = 4.0, 3.0 Hz), 6.25 (1H, dd, *J* = 4.0, 1.5 Hz), 2.54 (3H, s), 2.47 (3H, s); <sup>13</sup>C NMR (125 MHz, CDCl<sub>3</sub>): δ 156.97, 141.08, 139.44, 135.57, 134.48, 132.83, 132.13, 130.58, 129.28, 129.05, 129.03, 125.08, 122.66, 121.92, 117.58, 116.65, 113.95, 113.53, 112.62, 112.54, 106.00, 103.67, 21.57; HRMS (ESI) *m/z* calcd. for C<sub>28</sub>H<sub>20</sub>N<sub>4</sub> [M+H]<sup>+</sup> 413.1766, found 413.1770.

#### 4,11-Bis(4-methoxyphenyl)pyrrolo[1',2':4,5]pyrazino[2,3-f]indolizine-6-carbonitrile (**2f**)

Following the general procedures, **1f** was used as the starting material and **2f** was obtained as red solid, yield 87%. <sup>1</sup>H NMR (500 MHz, CDCl<sub>3</sub>): δ 8.06 (2H, d, *J* = 9.0 Hz), 7.84 (1H, dd, *J* = 3.0, 1.5 Hz), 7.40 (2H, d, *J* = 8.5 Hz), 7.14 (2H, d, *J* = 8.0 Hz), 7.05 (2H, d, *J* = 8.0 Hz), 7.00 (1H, dd, *J* = 4.5, 2.5 Hz), 6.94 (1H, dd, *J* = 4.0, 1.0 Hz), 6.76 (1H, dd, *J* = 3.0, 1.5 Hz), 6.39 (1H, dd, *J* = 4.0, 3.0 Hz), 6.28 (1H, dd, *J* = 4.0, 1.5 Hz), 3.96 (3H, s), 3.91 (3H, s); <sup>13</sup>C NMR (125 MHz, CDCl<sub>3</sub>): δ 160.78, 159.33, 155.27, 134.57, 131.89, 129.63, 129.44, 128.72, 126.02, 123.95, 121.58, 120.58, 116.66, 115.53, 114.25, 112.97, 112.92, 112.47, 111.59, 111.39, 104.65, 102.57, 54.43, 54.42; HRMS (ESI) *m/z* calcd. for C<sub>28</sub>H<sub>20</sub>N<sub>4</sub>O<sub>2</sub> [M+H]<sup>+</sup> 445.1665, found 445.1669.

#### 4,11-Di-m-tolylpyrrolo[1',2':4,5]pyrazino[2,3-f]indolizine-6-carbonitrile (**2g**)

Following the general procedures, **1g** was used as the starting material and **2g** was obtained as red solid, yield 86%. <sup>1</sup>H NMR (500 MHz, CDCl<sub>3</sub>): δ 7.88 (2H, m), 7.85 (1H, d, *J* = 7.5 Hz), 7.53 (1H, t, *J* = 7.5 Hz), 7.43 (2H, m), 7.37 (1H, d, *J* = 7.5 Hz), 7.31 (2H, m), 7.02 (1H, dd, *J* = 4.0, 3.0 Hz), 6.94 (1H, dd, *J* = 4.0, 1.5 Hz), 6.71 (1H, dd, *J* = 3.0, 1.0 Hz), 6.39 (1H, dd, *J* = 4.0, 3.0 Hz), 6.28 (1H, dd, *J* = 4.0, 1.5 Hz), 2.49 (3H, s), 2.48 (3H, s); <sup>13</sup>C NMR (125 MHz, CDCl<sub>3</sub>): δ 157.30, 139.81, 138.36, 137.20, 135.49, 135.07, 132.73, 131.51, 130.22, 129.80, 129.64, 129.58, 128.41, 126.26, 126.20, 125.12, 122.75, 122.00, 117.43, 116.73, 113.91, 113.56, 112.73, 112.71, 106.11, 103.76, 21.62, 21.60; HRMS (ESI) *m/z* calcd. for C<sub>28</sub>H<sub>20</sub>N<sub>4</sub> [M+H]<sup>+</sup> 413.1766, found 413.1768.

#### 4,11-Di-o-tolylpyrrolo[1',2':4,5]pyrazino[2,3-f]indolizine-6-carbonitrile (**2h**)

Following the general procedures, **1h** was used as the starting material and trace amount of **2h** was detected by HRMS (ESI) *m/z* calcd. for C<sub>28</sub>H<sub>20</sub>N<sub>4</sub> [M+H]<sup>+</sup> 413.1766, found 413.1769.

#### 4,11-Di(thiophen-2-yl)pyrrolo[1',2':4,5]pyrazino[2,3-f]indolizine-6-carbonitrile (**2i**)

Following the general procedures, **1i** was used as the starting material and **2i** was obtained as red solid, yield 84%. <sup>1</sup>H NMR (500 MHz, CDCl<sub>3</sub>): δ 7.99 (1H, dd, *J* = 3.5, 1.5 Hz), 7.85 (1H, dd, *J* = 2.5, 1.5 Hz), 7.69 (1H, dd, *J* = 5.0, 1.5 Hz), 7.60 (1H, dd, *J* = 5.0, 1.0 Hz), 7.33 (1H, dd, *J* = 5.5, 3.0 Hz), 7.27 (1H, dd, *J* = 3.5, 1.0 Hz), 7.25 (1H, dd, *J* = 4.5, 1.5 Hz), 7.21 (1H, dd, *J* = 5.0, 4.0 Hz), 7.03 (1H, dd, *J* = 4.0, 2.5 Hz), 6.79 (1H, dd, *J* = 3.0, 1.0 Hz), 6.50 (1H, dd, *J* = 4.0, 3.0 Hz), 6.43 (1H, dd, *J* = 4.0, 1.0 Hz); <sup>13</sup>C NMR (125 MHz, CDCl<sub>3</sub>): δ 149.92, 141.25, 134.66, 134.64, 132.90, 130.49, 129.70, 129.01, 128.63, 128.44, 127.97, 123.84, 122.66, 119.06, 117.01, 114.14, 113.61, 113.55, 113.30, 111.79, 106.42, 103.68; HRMS (ESI) *m/z* calcd. for C<sub>22</sub>H<sub>12</sub>N<sub>4</sub>S<sub>2</sub> [M+H]<sup>+</sup> 397.0582, found 397.0584.

#### 4,11-Dimethylpyrrolo[1',2':4,5]pyrazino[2,3-f]indolizine-6-carbonitrile (**2j**)

Following the general procedures, **1j** was used as the starting material and **2j** was obtained as red solid, yield 42%. <sup>1</sup>H NMR (500 MHz, CDCl<sub>3</sub>): δ 8.10 (1H, dd, *J* = 2.5, 1.0 Hz), 7.81 (1H, dd, *J* = 2.5, 1.5 Hz), 7.08 (1H, dd, *J* = 4.0, 2.5 Hz), 6.92 (1H, dd, *J* = 4.0, 1.0 Hz), 6.82 (1H, dd, *J* = 4.0, 1.0 Hz), 6.74 (1H, dd, *J* = 3.5, 3.0 Hz), 2.95 (3H, s), 2.68 (3H, s); <sup>13</sup>C NMR (125 MHz, CDCl<sub>3</sub>): δ 157.28, 135.33, 132.29, 126.49, 122.36, 117.63, 116.29, 114.11, 113.81, 112.86, 109.93, 101.85, 22.11, 17.55; HRMS (ESI) *m/z* calcd. for C<sub>16</sub>H<sub>12</sub>N<sub>4</sub> [M+H]<sup>+</sup> 261.1140, found 261.1144.

#### Pyrrolo[1',2':4,5]pyrazino[2,3-f]indolizine-6-carbonitrile (**2k**)

Following the general procedures, **1k** was used as the starting material and **2k** was obtained as red solid, yield 85%. <sup>1</sup>H NMR (500 MHz, d<sub>6</sub>-DMSO): δ 8.77 (1H, s), 8.62 (1H, s), 8.40 (1H, d, *J* = 2.0 Hz), 7.87 (1H, d, *J* = 2.5 Hz), 7.20 (1H, dd, *J* = 3.5, 2.5 Hz), 7.04 (1H, d, *J* = 4.0 Hz), 6.87 (1H, d, *J* = 4.0 Hz), 6.83 (1H, dd, *J* = 4.0, 2.5 Hz); <sup>13</sup>C NMR (125 MHz, d<sub>6</sub>-DMSO): δ 149.8, 139.9, 131.0, 125.1, 120.6, 119.6, 118.2, 114.4, 113.9, 113.6, 112.6, 107.0, 105.7, 103.1; HRMS (ESI) *m/z* calcd. for C<sub>14</sub>H<sub>8</sub>N<sub>4</sub> [M+H]<sup>+</sup> 233.0827, found 233.0825.

#### 4,11-Diphenylimidazo[1',2':1,6]pyrido[3,4-e]imidazo[1,2-a]pyrazine-6-carbonitrile (**3a**)

Following the general procedures, **1l** was used as the starting material and **3a** was obtained as orange solid, yield 55%. <sup>1</sup>H NMR (500 MHz, CDCl<sub>3</sub>): δ 8.85 (2H, dd, *J* = 2.5, 1.5 Hz), 8.21 (1H, d, *J* = 1.0 Hz), 8.00 (1H, d, *J* = 1.0 Hz), 7.71 (3H, m), 7.57 (5H, m), 7.47 (1H, d, *J* = 1.5 Hz), 6.88 (1H, d, *J* = 1.5 Hz); <sup>13</sup>C NMR (125 MHz, CDCl<sub>3</sub>): δ 153.71, 143.51, 138.14, 137.66, 134.52, 133.55, 133.12, 132.26, 132.08, 130.59, 130.36, 130.13, 129.36, 128.55, 122.48, 121.22, 118.37, 113.31, 112.21, 107.89; HRMS (ESI) *m/z* calcd. for C<sub>24</sub>H<sub>14</sub>N<sub>6</sub> [M+H]<sup>+</sup> 387.1358, found 387.1361.

#### 4,11-Bis(4-fluorophenyl)imidazo[1',2':1,6]pyrido[3,4-e]imidazo[1,2-a]pyrazine-6-carbonitrile (**3b**)

Following the general procedures, **1m** was used as the starting material and **3b** was obtained as orange solid, yield 47%. <sup>1</sup>H NMR (500 MHz, CDCl<sub>3</sub>): δ 9.00–8.96 (2H, m), 8.23 (1H, d, *J* = 1.5 Hz), 8.01 (1H, d, *J* = 1.0 Hz), 7.57–7.54 (2H, m), 7.53 (1H, d, *J* = 1.5 Hz), 7.41 (2H, tt, *J* = 8.5, 2.0 Hz), 7.28 (2H, tt, *J* = 8.0, 2.0 Hz), 6.98 (1H, d, *J* = 1.5 Hz); <sup>13</sup>C NMR (125 MHz, CDCl<sub>3</sub>): δ 152.40, 143.47, 138.18, 137.57, 133.38, 133.26, 133.13, 133.06, 131.59, 131.52, 129.33 (<sup>1</sup>*J*<sub>C-F</sub> = 325 Hz), 129.30 (<sup>1</sup>*J*<sub>C-F</sub> = 325 Hz), 122.59, 120.09, 118.20, 117.46 (<sup>2</sup>*J*<sub>C-F</sub> = 21 Hz), 115.73 (<sup>2</sup>*J*<sub>C-F</sub> = 23 Hz), 113.47, 112.08, 108.02; HRMS (ESI) *m/z* calcd. for C<sub>24</sub>H<sub>12</sub>F<sub>2</sub>N<sub>6</sub> [M+H]<sup>+</sup> 423.1170, found 423.1177.

4,11-Bis(4-chlorophenyl)imidazo[1',2':1,6]pyrido[3,4-e]imidazo[1,2-a]pyrazine-6-carbonitrile (**3c**)

Following the general procedures, **1n** was used as the starting material and **3c** was obtained as orange solid, yield 42%. <sup>1</sup>H NMR (500 MHz, CDCl<sub>3</sub>): δ 8.85 (2H, d, *J* = 8.5 Hz), 8.19 (1H, s), 8.00 (1H, s), 7.69 (2H, d, *J* = 7.0 Hz), 7.50 (5H, m), 7.00 (1H, s); <sup>13</sup>C NMR (125 MHz, CDCl<sub>3</sub>): δ 152.10, 143.21, 138.71, 138.21, 137.37, 136.85, 133.34, 133.17, 132.65, 131.89, 130.97, 130.50, 130.43, 128.82, 122.38, 119.81, 118.30, 113.54, 111.97, 108.15; HRMS (ESI) *m/z* calcd. for C<sub>24</sub>H<sub>12</sub>Cl<sub>2</sub>N<sub>6</sub> [M+H]<sup>+</sup> 455.0579, found 455.0582.

4,11-Bis(4-bromophenyl)imidazo[1',2':1,6]pyrido[3,4-e]imidazo[1,2-a]pyrazine-6-carbonitrile (**3d**)

Following the general procedures, **1o** was used as the starting material and **3d** was obtained as orange solid, yield 53%. <sup>1</sup>H NMR (500 MHz, CDCl<sub>3</sub>): δ 8.82 (2H, dt, *J* = 9.0, 2.0 Hz), 8.23 (1H, d, *J* = 1.0 Hz), 8.01 (1H, d, *J* = 1.0 Hz), 7.84 (2H, tt, *J* = 8.5, 2.0 Hz), 7.72 (2H, tt, *J* = 9.0, 2.5 Hz), 7.54 (1H, d, *J* = 1.5 Hz), 7.45 (2H, tt, *J* = 9.0, 2.0 Hz), 7.04 (1H, d, *J* = 1.0 Hz); <sup>13</sup>C NMR (125 MHz, CDCl<sub>3</sub>): δ 152.53, 143.20, 138.32, 137.46, 133.43, 133.26, 133.23, 132.13, 131.87, 131.16, 131.02, 127.46, 125.07, 122.34, 119.85, 118.31, 113.54, 112.02, 108.24, 100.00; HRMS (ESI) *m/z* calcd. for C<sub>24</sub>H<sub>12</sub>Br<sub>2</sub>N<sub>6</sub> [M+H]<sup>+</sup> 542.9568, found 542.9574.

4,11-Bis(4-(trifluoromethyl)phenyl)imidazo[1',2':1,6]pyrido[3,4-e]imidazo[1,2-a]pyrazine-6-carbonitrile (**3e**)

Following the general procedures, **1p** was used as the starting material and **3e** was obtained as orange solid, yield 21%. <sup>1</sup>H NMR (500 MHz, CDCl<sub>3</sub>): δ 9.01 (2H, d, *J* = 8.0 Hz), 8.26 (1H, d, *J* = 1.5 Hz), 8.03 (1H, d, *J* = 1.0 Hz), 7.99 (2H, d, *J* = 8.0 Hz), 7.85 (2H, d, *J* = 8.5 Hz), 7.73 (2H, d, *J* = 8.0 Hz), 7.56 (1H, d, *J* = 1.0 Hz), 6.93 (1H, d, *J* = 1.5 Hz); <sup>13</sup>C NMR (125 MHz, CDCl<sub>3</sub>): δ 152.42, 143.07, 138.53, 137.48, 135.90, 135.89, 133.80, 133.48 (<sup>2</sup>*J*<sub>C-F</sub> = 33 Hz), 132.98, 132.68 (<sup>2</sup>*J*<sub>C-F</sub> = 33 Hz), 130.95, 130.24, 127.11 (<sup>3</sup>*J*<sub>C-F</sub> = 4 Hz), 125.47 (<sup>3</sup>*J*<sub>C-F</sub> = 4 Hz), 123.87 (<sup>1</sup>*J*<sub>C-F</sub> = 270 Hz), 123.67 (<sup>1</sup>*J*<sub>C-F</sub> = 271 Hz), 122.43, 119.43, 118.24, 113.67, 111.74, 108.95; HRMS (ESI) *m/z* calcd. for C<sub>26</sub>H<sub>12</sub>F<sub>6</sub>N<sub>6</sub> [M+H]<sup>+</sup> 523.1106, found 523.1109.

4,11-Di-p-tolylimidazo[1',2':1,6]pyrido[3,4-e]imidazo[1,2-a]pyrazine-6-carbonitrile (**3f**)

Following the general procedures, **1q** was used as the starting material and **3f** was obtained as orange solid, yield 57%. <sup>1</sup>H NMR (500 MHz, CDCl<sub>3</sub>): δ 8.76 (2H, d, *J* = 8.5 Hz), 8.17 (1H, d, *J* = 1.5 Hz), 7.96 (1H, d, *J* = 1.0 Hz), 7.50 (2H, d, *J* = 7.5 Hz), 7.46 (1H, d, *J* = 1.5 Hz), 7.41 (2H, d, *J* = 7.5 Hz), 7.36 (2H, d, *J* = 8.0 Hz), 6.98 (1H, d, *J* = 1.5 Hz); 2.54 (3H, s), 2.46 (3H, s); <sup>13</sup>C NMR (125 MHz, CDCl<sub>3</sub>): δ 153.09, 143.45, 142.77, 140.48, 137.63, 137.52, 133.61, 132.81, 131.68, 130.78, 130.49, 129.20, 129.09, 122.49, 121.21, 118.32, 113.13, 112.21, 107.38, 21.73, 21.65; HRMS (ESI) *m/z* calcd. for C<sub>26</sub>H<sub>18</sub>N<sub>6</sub> [M+H]<sup>+</sup> 415.1671, found 415.1675.

4,11-Bis(4-methoxyphenyl)imidazo[1',2':1,6]pyrido[3,4-e]imidazo[1,2-a]pyrazine-6-carbonitrile (**3g**)

Following the general procedures, **1r** was used as the starting material and **3g** was obtained as orange solid, yield 63%. <sup>1</sup>H NMR (500 MHz, CDCl<sub>3</sub>): δ 8.94 (2H, d, *J* = 9.0 Hz), 8.16 (1H, d, *J* = 1.0 Hz), 7.97 (1H, s), 7.45–7.47 (3H, m), 7.20 (2H, d, *J* = 8.5 Hz), 7.06 (2H, d, *J* = 8.5 Hz), 7.03 (1H, d, *J* = 1.0 Hz), 3.95 (3H, s), 3.92 (3H, s); <sup>13</sup>C NMR (125 MHz, CDCl<sub>3</sub>): δ 163.04, 161.06,

152.69, 143.52, 137.70, 137.44, 133.97, 133.45, 132.81, 132.65, 130.79, 127.14, 123.87, 122.80, 121.00, 118.30, 115.60, 113.97, 113.76, 113.21, 112.39, 107.04, 55.53, 55.51; HRMS (ESI)  $m/z$  calcd. for  $C_{26}H_{18}N_6O_2$   $[M+H]^+$  447.1569, found 447.1573.

4,11-Bis(4-(tert-butyl)phenyl)imidazo[1',2':1,6]pyrido[3,4-e]imidazo[1,2-a]pyrazine-6-carbonitrile (**3h**)

Following the general procedures, **1s** was used as the starting material and **3h** was obtained as orange solid, yield 74%.  $^1H$  NMR (500 MHz,  $CDCl_3$ ):  $\delta$  8.75 (2H, dt,  $J$  = 8.5, 2.0 Hz), 8.20 (1H, d,  $J$  = 0.5 Hz), 8.00 (1H, d,  $J$  = 1.0 Hz), 7.71 (2H, d,  $J$  = 8.5 Hz), 7.61 (2H, dt,  $J$  = 7.0, 1.5 Hz), 7.48–7.46 (2H, m), 6.87 (1H, d,  $J$  = 1.0 Hz), 1.46 (3H, s), 1.40 (3H, s);  $^{13}C$  NMR (125 MHz,  $CDCl_3$ ):  $\delta$  155.70, 153.89, 153.61, 143.54, 137.86, 137.78, 133.86, 133.07, 131.87, 130.41, 129.07, 128.97, 127.09, 125.63, 122.75, 121.45, 118.34, 113.22, 112.29, 107.55, 35.10, 35.07, 31.39, 31.18; HRMS (ESI)  $m/z$  calcd. for  $C_{32}H_{30}N_6$   $[M+H]^+$  499.2610, found 499.2615. When 3 mmol **1r** was used as starting materials and **3h** was obtained in the yield of 71%.

4,11-Di-m-tolylimidazo[1',2':1,6]pyrido[3,4-e]imidazo[1,2-a]pyrazine-6-carbonitrile (**3i**)

Following the general procedures, **1t** was used as the starting material and **3i** was obtained as orange solid, yield 52%.  $^1H$  NMR (500 MHz,  $CDCl_3$ ):  $\delta$  8.63–8.62 (2H, m), 8.20 (1H, s), 8.00 (1H, s), 7.59 (1H, t,  $J$  = 8.0 Hz), 7.50–7.44 (3H, m), 7.40 (1H, d,  $J$  = 7.0 Hz), 7.34–7.32 (2H, m), 6.88 (1H, s), 2.51 (3H, s), 2.49 (3H, s);  $^{13}C$  NMR (125 MHz,  $CDCl_3$ ):  $\delta$  153.99, 143.47, 140.11, 138.21, 137.92, 137.69, 134.54, 133.62, 133.08, 132.93, 132.11, 131.18, 130.95, 130.06, 129.67, 128.42, 127.90, 126.29, 122.57, 121.40, 118.42, 113.25, 112.21, 107.72, 21.70, 21.68; HRMS (ESI)  $m/z$  calcd. for  $C_{26}H_{18}N_6$   $[M+H]^+$  415.1671, found 415.1676.

4,11-Di-o-tolylimidazo[1',2':1,6]pyrido[3,4-e]imidazo[1,2-a]pyrazine-6-carbonitrile (**3j**)

Following the general procedures, **1u** was used as the starting material. We tried different methylation reagents and reaction conditions and could not produce **3j**.

4,11-Bis(2-chlorophenyl)imidazo[1',2':1,6]pyrido[3,4-e]imidazo[1,2-a]pyrazine-6-carbonitrile (**3k**)

Following the general procedures, **1v** was used as starting materials and **3k** was obtained as orange solid, yield 37%.  $^1H$  NMR (500 MHz,  $CDCl_3$ ):  $\delta$  8.25 (1H, d,  $J$  = 1.0 Hz),  $\delta$  8.03 (1H, d,  $J$  = 1.5 Hz), 7.79 (1H, dd,  $J$  = 7.0, 1.5 Hz), 7.75 (1H, dd,  $J$  = 7.0, 1.0 Hz), 7.68 (1H, td,  $J$  = 7.5, 1.5 Hz), 7.62 (1H, td,  $J$  = 7.5, 1.5 Hz), 7.59 (1H, dd,  $J$  = 8.0, 1.5 Hz), 7.57 (1H, dd,  $J$  = 7.5, 1.5 Hz), 7.53–7.46 (3H, m), 6.89 (1H, d,  $J$  = 1.5 Hz);  $^{13}C$  NMR (125 MHz,  $CDCl_3$ ):  $\delta$  155.50, 142.72, 138.48, 137.85, 134.46, 134.15, 133.96, 133.50, 132.97, 132.06, 131.54, 131.51, 131.32, 131.25, 130.86, 130.56, 128.42, 126.81, 123.25, 118.24, 117.51, 113.54, 111.85, 109.31; HRMS (ESI)  $m/z$  calcd. for  $C_{24}H_{12}Cl_2N_6$   $[M+H]^+$  455.0579, found 455.0586.

4,11-Bis(2,4-dichlorophenyl)imidazo[1',2':1,6]pyrido[3,4-e]imidazo[1,2-a]pyrazine-6-carbonitrile (**3l**)

Following the general procedures, **1w** was used as the starting material and **3l** was obtained as orange solid, yield 24%.  $^1H$  NMR (500 MHz,  $CDCl_3$ ):  $\delta$  8.26 (1H, d,  $J$  = 2.0 Hz), 8.04 (1H, d,  $J$  = 1.0 Hz), 7.79–7.77 (2H, m), 7.63 (1H, d,  $J$  = 2.0 Hz), 7.62 (2H, dd,  $J$  = 8.5, 2.0 Hz), 7.56 (1H, d,  $J$

= 1.5 Hz), 7.52 (1H, d,  $J$  = 8.0 Hz), 7.47 (1H, dd,  $J$  = 8.5, 2.0 Hz), 7.02 (1H, d,  $J$  = 1.0 Hz);  $^{13}\text{C}$  NMR (125 MHz,  $\text{CDCl}_3$ ):  $\delta$  154.44, 142.52, 138.56, 137.80, 137.66, 137.25, 135.10, 134.71, 134.55, 132.69, 132.51, 132.24, 132.20, 130.89, 130.60, 129.62, 128.92, 127.24, 123.26, 117.48, 116.99, 113.71, 111.61, 109.66; HRMS (ESI)  $m/z$  calcd. for  $\text{C}_{24}\text{H}_{10}\text{Cl}_4\text{N}_6$   $[\text{M}+\text{H}]^+$  522.9799, found 522.9805.

#### 4,11-Di(thiophen-2-yl)imidazo[1',2':1,6]pyrido[3,4-e]imidazo[1,2-a]pyrazine-6-carbonitrile (**3m**)

Following the general procedures, **1x** was used as the starting material and **3m** was obtained as orange solid, yield 41%.  $^1\text{H}$  NMR (500 MHz,  $\text{CDCl}_3$ ):  $\delta$  8.92 (1H, dd,  $J$  = 4.0, 1.0 Hz), 8.18 (1H, d,  $J$  = 1.0 Hz), 8.00 (1H, d,  $J$  = 1.0 Hz), 7.80 (1H, dd,  $J$  = 4.5, 1.0 Hz), 7.73 (1H, dd,  $J$  = 5.0, 1.0 Hz), 7.54 (1H, d,  $J$  = 1.0 Hz), 7.39 (1H, dd,  $J$  = 5.0, 3.5 Hz), 7.34 (1H, dd,  $J$  = 3.5, 1.0 Hz), 7.27 (1H, dd,  $J$  = 5.0, 4.0 Hz), 6.98 (1H, d,  $J$  = 1.5 Hz);  $^{13}\text{C}$  NMR (125 MHz,  $\text{CDCl}_3$ ):  $\delta$  148.44, 143.50, 143.31, 138.81, 137.55, 136.60, 135.08, 133.96, 133.49, 133.37, 130.17, 129.98, 128.79, 128.75, 124.26, 118.32, 114.09, 113.38, 111.93, 107.71; HRMS (ESI)  $m/z$  calcd. for  $\text{C}_{20}\text{H}_{10}\text{S}_6$   $[\text{M}+\text{H}]^+$  542.9568, found 542.9574.

#### 6-Cyano-5-methyl-4,11-diphenylpyrrolo[1',2':4,5]pyrazino[2,3-f]indolizin-5-ium iodide (**2aa**)

Following the general procedures, **2a** was used as the starting material. We tried different methylation reagents and reaction conditions and could not produce **2aa**.

#### 6-Cyano-5-methyl-4,11-diphenylimidazo[1',2':1,6]pyrido[3,4-e]imidazo[1,2-a]pyrazin-5-ium iodide (**4a**)

Following the general procedures, **3a** and iodomethane were used as starting materials and **4a** was obtained as yellow solid, yield 90%.  $^1\text{H}$  NMR (500 MHz,  $\text{d}_6\text{-DMSO}$ ):  $\delta$  8.98 (1H, d,  $J$  = 2.0 Hz), 8.81 (2H, d,  $J$  = 7.0 Hz), 8.64 (1H, d,  $J$  = 2.0 Hz), 7.92 (1H, t,  $J$  = 7.5 Hz), 7.86 (2H, t,  $J$  = 7.5 Hz), 7.77–7.68 (6H, m), 6.54 (1H, d,  $J$  = 1.0 Hz), 3.40 (3H, s);  $^{13}\text{C}$  NMR (125 MHz,  $\text{d}_6\text{-DMSO}$ ):  $\delta$  155.19, 138.28, 136.16, 135.20, 134.79, 134.21, 133.27, 132.61, 132.37, 130.97, 130.95, 130.91, 129.70, 129.22, 128.80, 119.05, 117.62, 114.86, 111.19, 110.89, 38.52; HRMS (ESI)  $m/z$  calcd. for  $\text{C}_{25}\text{H}_{17}\text{IN}_6$   $[\text{M}-\text{I}]^+$  528.0559, found 528.0564.

#### 6-Cyano-4,11-bis(4-fluorophenyl)-5-methylimidazo[1',2':1,6]pyrido[3,4-e]imidazo[1,2-a]pyrazin-5-ium iodide (**4b**)

Following the general procedures, **3b** and iodomethane were used as starting materials and **4b** was obtained as yellow solid, yield 94%.  $^1\text{H}$  NMR (500 MHz,  $\text{d}_6\text{-DMSO}$ ):  $\delta$  8.98 (1H, d,  $J$  = 2.5 Hz), 8.96–8.93 (2H, m), 8.63 (1H, d,  $J$  = 2.0 Hz), 7.80–7.77 (3H, m), 7.72 (2H, tt,  $J$  = 9.0, 2.0 Hz), 7.58 (2H, tt,  $J$  = 8.5, 2.0 Hz), 6.67 (1H, d,  $J$  = 1.5 Hz), 3.41 (3H, s);  $^{13}\text{C}$  NMR (125 MHz,  $\text{d}_6\text{-DMSO}$ ):  $\delta$  153.89, 138.18, 136.28, 135.07, 134.95, 133.73, 133.66, 133.56, 133.49, 132.34, 130.69, 129.96, 123.56 ( $^1J_{\text{C-F}}$  = 346 Hz), 123.53 ( $^1J_{\text{C-F}}$  = 345 Hz), 119.35, 118.26 ( $^2J_{\text{C-F}}$  = 23 Hz), 116.67 ( $^2J_{\text{C-F}}$  = 26 Hz), 116.39, 114.82, 111.16, 38.70; HRMS (ESI)  $m/z$  calcd. for  $\text{C}_{25}\text{H}_{15}\text{F}_2\text{IN}_6$   $[\text{M}-\text{I}]^+$  437.1321, found 437.1325.

#### 4,11-Bis(4-chlorophenyl)-6-cyano-5-methylimidazo[1',2':1,6]pyrido[3,4-e]imidazo[1,2-a]pyrazin-5-ium iodide (**4c**)

Following the general procedures, **3c** and iodomethane were used as starting materials and **4c** was

obtained as yellow solid, yield 92%. <sup>1</sup>H NMR (500 MHz, d<sub>6</sub>-DMSO): δ 8.99 (1H, d, *J* = 2.0 Hz), 8.74 (2H, tt, *J* = 9.0, 2.0 Hz), 8.65 (1H, d, *J* = 2.0 Hz), 7.95 (2H, tt, *J* = 9.0, 2.0 Hz), 7.81 (3H, m), 7.77 (2H, tt, *J* = 9.0, 2.0 Hz), 6.70 (1H, d, *J* = 1.5 Hz), 3.43 (3H, s); <sup>13</sup>C NMR (125 MHz, d<sub>6</sub>-DMSO): δ 153.96, 138.44, 138.17, 137.58, 137.56, 136.13, 135.11, 134.99, 132.93, 132.67, 132.42, 132.21, 131.11, 129.80, 129.49, 127.49, 119.42, 116.51, 114.93, 111.08, 38.79; HRMS (ESI) *m/z* calcd. for C<sub>25</sub>H<sub>15</sub>Cl<sub>2</sub>IN<sub>6</sub> [M-I]<sup>+</sup> 469.0730, found 469.0733.

4,11-Bis(4-bromophenyl)-6-cyano-5-methylimidazo[1',2':1,6]pyrido[3,4-e]imidazo[1,2-a]pyrazin-5-ium iodide (**4d**)

Following the general procedures, **3d** and iodomethane were used as starting materials and **4d** was obtained as yellow solid, yield 95%. <sup>1</sup>H NMR (500 MHz, d<sub>6</sub>-DMSO): δ 8.99 (1H, d, *J* = 2.0 Hz), 8.79 (2H, d, *J* = 8.0 Hz), 8.65 (1H, d, *J* = 2.0 Hz), 8.08 (2H, d, *J* = 8.0 Hz), 7.94 (2H, d, *J* = 8.5 Hz), 7.82 (1H, s), 7.69 (2H, d, *J* = 8.0 Hz), 6.70 (1H, d, *J* = 1.0 Hz), 3.43 (3H, s); <sup>13</sup>C NMR (125 MHz, d<sub>6</sub>-DMSO): δ 154.11, 138.14, 136.05, 135.11, 134.99, 134.01, 133.27, 133.09, 132.78, 132.43, 129.72, 127.87, 127.65, 126.38, 119.40, 116.54, 114.93, 111.09, 38.80; HRMS (ESI) *m/z* calcd. for C<sub>25</sub>H<sub>15</sub>Br<sub>2</sub>IN<sub>6</sub> [M-I]<sup>+</sup> 556.9719, found 556.9731.

6-Cyano-4,11-bis(4-methoxyphenyl)-5-methylimidazo[1',2':1,6]pyrido[3,4-e]imidazo[1,2-a]pyrazin-5-ium iodide **4e**

Following the general procedures, **3g** and iodomethane were used as starting materials and **4e** was obtained as yellow solid, yield 85%. <sup>1</sup>H NMR (500 MHz, d<sub>6</sub>-DMSO): δ 8.93 (2H, d, *J* = 9.0 Hz), 8.91 (1H, d, *J* = 2.0 Hz), 8.60 (1H, d, *J* = 2.0 Hz), 7.75 (1H, d, *J* = 1.5 Hz), 7.63 (2H, d, *J* = 8.5 Hz), 7.40 (2H, d, *J* = 9.0 Hz), 7.24 (2H, d, *J* = 9.5 Hz), 6.66 (1H, d, *J* = 1.0 Hz), 3.97 (3H, s), 3.91 (3H, s), 3.43 (3H, s); <sup>13</sup>C NMR (125 MHz, d<sub>6</sub>-DMSO): δ 163.77, 162.16, 153.82, 138.13, 136.30, 135.49, 134.55, 133.14, 132.29, 132.14, 129.95, 126.48, 120.16, 119.02, 117.66, 116.33, 114.82, 114.65, 111.34, 109.88, 56.18, 56.17, 38.62; HRMS (ESI) *m/z* calcd. for C<sub>27</sub>H<sub>21</sub>IN<sub>6</sub>O<sub>2</sub> [M-I]<sup>+</sup> 461.1721, found 461.1730.

4,11-Bis(4-(tert-butyl)phenyl)-6-cyano-5-methylimidazo[1',2':1,6]pyrido[3,4-e]imidazo[1,2-a]pyrazin-5-ium iodide (**4f**)

Following the general procedures, **3h** and iodomethane were used as starting materials and **4f** was obtained as yellow solid, yield 88%. <sup>1</sup>H NMR (500 MHz, CDCl<sub>3</sub>): δ 8.73 (2H, d, *J* = 8.5 Hz), 8.57 (1H, d, *J* = 1.5 Hz), 8.40 (1H, d, *J* = 2.5 Hz), 7.84 (2H, d, *J* = 8.5 Hz), 7.74 (2H, d, *J* = 8.5 Hz), 7.60 (2H, d, *J* = 9.0 Hz), 7.49 (1H, d, *J* = 1.5 Hz), 6.55 (1H, d, *J* = 1.5 Hz), 3.51 (3H, s), 1.44 (9H, s), 1.38 (9H, s); <sup>13</sup>C NMR (125 MHz, CDCl<sub>3</sub>): δ 156.86, 156.36, 156.21, 138.06, 136.39, 135.47, 134.31, 132.38, 131.11, 130.98, 130.52, 129.82, 127.45, 125.79, 125.12, 118.57, 118.12, 113.65, 110.46, 39.29, 35.36, 35.22, 31.36, 31.11; HRMS (ESI) *m/z* calcd. for C<sub>33</sub>H<sub>33</sub>IN<sub>6</sub> [M-I]<sup>+</sup> 513.2761, found 513.2771.

6-Cyano-5-methyl-4,11-di-m-tolylimidazo[1',2':1,6]pyrido[3,4-e]imidazo[1,2-a]pyrazin-5-ium iodide (**4g**)

Following the general procedures, **3i** and iodomethane were used as starting materials and **4g** was obtained as yellow solid, yield 84%. <sup>1</sup>H NMR (500 MHz, d<sub>6</sub>-DMSO): δ 8.98 (1H, s), 8.65 (2H, s),

8.60 (1H, d,  $J = 1.5$  Hz), 7.74–7.78 (3H, m), 7.56 (4H, m), 6.62 (1H, s), 3.43 (3H, s), 2.51 (6H, s);  $^{13}\text{C}$  NMR (125 MHz,  $d_6$ -DMSO):  $\delta$  155.22, 140.71, 138.35, 138.23, 136.09, 135.20, 134.81, 134.24, 133.94, 133.15, 132.33, 131.33, 131.11, 130.78, 129.60, 129.12, 128.68, 128.25, 127.92, 119.13, 117.67, 114.85, 111.20, 110.79, 38.54, 21.74, 21.62; HRMS (ESI)  $m/z$  calcd. for  $\text{C}_{27}\text{H}_{21}\text{IN}_6$   $[\text{M-I}]^+$  429.1822, found 429.1825.

4,11-Bis(4-(tert-butyl)phenyl)-6-cyano-5-ethylimidazo[1',2':1,6]pyrido[3,4-e]imidazo[1,2-a]pyrazin-5-ium iodide (**5a**)

Following the general procedures, **3h** and iodoethane were used as starting materials and **5a** was obtained as yellow solid, yield 89%.  $^1\text{H}$  NMR (500 MHz,  $\text{CDCl}_3$ ):  $\delta$  8.72 (2H, d,  $J = 8.5$  Hz), 8.53 (1H, d,  $J = 2.0$  Hz), 8.41 (1H, d,  $J = 2.0$  Hz), 7.86 (2H, d,  $J = 8.5$  Hz), 7.73 (2H, d,  $J = 8.0$  Hz), 7.58 (2H, d,  $J = 8.5$  Hz), 7.45 (1H, d,  $J = 1.5$  Hz), 6.43 (1H, d,  $J = 1.5$  Hz), 3.81 (2H, q,  $J = 7.5$  Hz), 1.43 (9H, s), 1.37 (9H, s), 1.24 (3H, t,  $J = 7.5$  Hz);  $^{13}\text{C}$  NMR (125 MHz,  $\text{CDCl}_3$ ):  $\delta$  156.73, 156.38, 156.01, 138.09, 136.14, 135.46, 134.23, 131.13, 130.95, 130.18, 130.07, 127.62, 125.75, 125.53, 118.64, 117.98, 114.41, 110.66, 110.59, 46.11, 35.36, 35.20, 31.33, 31.12, 16.19; HRMS (ESI)  $m/z$  calcd. for  $\text{C}_{34}\text{H}_{35}\text{IN}_6$   $[\text{M-I}]^+$  527.2918, found 527.2924.

4,11-Bis(4-(tert-butyl)phenyl)-6-cyano-5-propylimidazo[1',2':1,6]pyrido[3,4-e]imidazo[1,2-a]pyrazin-5-ium iodide (**5b**)

Following the general procedures, **3h** and 1-iodopropane were used as starting materials and **5b** was obtained as yellow solid, yield 91%.  $^1\text{H}$  NMR (500 MHz,  $\text{CDCl}_3$ ):  $\delta$  8.76 (2H, d,  $J = 8.5$  Hz), 8.50 (1H, d,  $J = 2.0$  Hz), 8.40 (1H, d,  $J = 2.0$  Hz), 7.88 (2H, d,  $J = 8.0$  Hz), 7.78 (2H, d,  $J = 8.5$  Hz), 7.61 (2H, d,  $J = 9.0$  Hz), 7.51 (1H, d,  $J = 1.5$  Hz), 6.52 (1H, d,  $J = 1.5$  Hz), 3.70–3.67 (2H, m), 1.73–1.65 (2H, m), 1.46 (9H, s), 1.39 (9H, s), 0.59 (3H, t,  $J = 7.0$  Hz);  $^{13}\text{C}$  NMR (125 MHz,  $\text{CDCl}_3$ ):  $\delta$  156.88, 156.43, 156.24, 138.16, 136.07, 135.50, 134.36, 131.11, 131.01, 130.71, 130.22, 130.06, 127.75, 125.80, 125.45, 118.62, 117.74, 114.22, 110.83, 110.47, 52.14, 35.40, 35.23, 31.34, 31.11, 24.51; HRMS (ESI)  $m/z$  calcd. for  $\text{C}_{35}\text{H}_{37}\text{IN}_6$   $[\text{M-I}]^+$  541.3074, found 541.3082.

5-Allyl-4,11-Bis(4-(tert-butyl)phenyl)-6-cyanoimidazo[1',2':1,6]pyrido[3,4-e]imidazo[1,2-a]pyrazin-5-ium iodide (**5c**)

Following the general procedures, **3h** and 3-iodoprop-1-ene were used as starting materials and **5c** was obtained as yellow solid, yield 90%.  $^1\text{H}$  NMR (500 MHz,  $d_6$ -DMSO):  $\delta$  9.04 (1H, d,  $J = 2.5$  Hz), 8.76 (2H, d,  $J = 8.5$  Hz), 8.64 (1H, d,  $J = 2.0$  Hz), 7.86 (2H, d,  $J = 8.5$  Hz), 7.78 (1H, d,  $J = 1.5$  Hz), 7.73 (2H, d,  $J = 9.0$  Hz), 7.59 (2H, d,  $J = 8.5$  Hz), 6.45 (1H, d,  $J = 1.5$  Hz), 5.68–5.60 (1H, m), 5.14 (1H, d,  $J = 10.5$  Hz), 4.74 (1H, d,  $J = 12$  Hz), 4.38 (2H, d,  $J = 4.5$  Hz), 1.44 (9H, s), 1.38 (9H, s);  $^{13}\text{C}$  NMR (125 MHz,  $d_6$ -DMSO):  $\delta$  156.57, 156.02, 155.08, 138.29, 136.06, 135.30, 134.85, 132.56, 131.55, 131.18, 130.93, 130.31, 130.26, 127.81, 126.17, 125.58, 118.94, 118.35, 117.35, 115.92, 111.28, 111.25, 111.23, 51.93, 35.54, 35.43, 31.50, 31.33; HRMS (ESI)  $m/z$  calcd. for  $\text{C}_{35}\text{H}_{35}\text{IN}_6$   $[\text{M-I}]^+$  539.2918, found 539.2920.

5-(But-3-yn-1-yl)-4,11-bis(4-(tert-butyl)phenyl)-6-cyanoimidazo[1',2':1,6]pyrido[3,4-e]imidazo[1,2-a]pyrazin-5-ium iodide (**5d**)

Following the general procedures, **3h** and 4-iodobut-1-yne were used as starting materials and **5d**

was obtained as yellow solid, yield 94%. <sup>1</sup>H NMR (500 MHz, CDCl<sub>3</sub>): δ 8.77 (2H, d, *J* = 8.5 Hz), 8.49 (1H, s), 8.40 (1H, s), 7.92 (2H, d, *J* = 8.0 Hz), 7.81 (2H, d, *J* = 7.5 Hz), 7.62 (2H, d, *J* = 8.5 Hz), 7.53 (1H, d, *J* = 1.5 Hz), 6.52 (1H, d, *J* = 1.0 Hz), 3.97 (2H, t, *J* = 7.0 Hz), 2.61–2.58 (2H, m), 1.99 (1H, t, *J* = 2.0 Hz), 1.47 (9H, s), 1.40 (9H, s); <sup>13</sup>C NMR (125 MHz, CDCl<sub>3</sub>): δ 157.04, 156.73, 156.48, 138.19, 137.10, 136.41, 135.60, 134.51, 131.07, 131.04, 130.61, 130.59, 130.56, 130.06, 128.06, 125.85, 125.08, 118.61, 117.71, 114.14, 110.93, 110.33, 72.54, 48.73, 35.44, 35.25, 31.30, 31.11, 20.88; HRMS (ESI) *m/z* calcd. for C<sub>36</sub>H<sub>35</sub>IN<sub>6</sub> [M-I]<sup>+</sup> 551.2918, found 551.2931.

4,11-Bis(4-(tert-butyl)phenyl)-6-cyano-5-(pent-4-yn-1-yl)imidazo[1',2':1,6]pyrido[3,4-e]imidazo[1,2-a]pyrazin-5-ium iodide (**5e**)

Following the general procedures, **3h** and 5-iodopent-1-yne were used as starting materials and **5e** was obtained as yellow solid, yield 91%. <sup>1</sup>H NMR (500 MHz, d<sub>6</sub>-DMSO): δ 9.02 (1H, d, *J* = 2.0 Hz), 8.75 (2H, d, *J* = 8.5 Hz), 8.72 (1H, d, *J* = 2.5 Hz), 7.91 (2H, d, *J* = 7.5 Hz), 7.77 (1H, d, *J* = 1.0 Hz), 7.74–7.70 (4H, m), 6.49 (1H, d, *J* = 1.0 Hz), 3.72 (2H, t, *J* = 8.0 Hz), 2.83 (1H, t, *J* = 2.5 Hz), 1.79–1.76 (2H, m), 1.74–1.68 (2H, m), 1.46 (9H, s), 1.38 (9H, s); <sup>13</sup>C NMR (125 MHz, d<sub>6</sub>-DMSO): δ 156.55, 155.90, 155.03, 138.28, 136.15, 135.31, 134.84, 131.52, 130.98, 130.92, 130.15, 130.05, 128.08, 126.16, 126.00, 118.95, 117.58, 115.52, 111.21, 110.82, 82.52, 72.69, 49.29, 35.56, 35.43, 31.48, 31.33, 29.19, 15.41; HRMS (ESI) *m/z* calcd. for C<sub>37</sub>H<sub>37</sub>IN<sub>6</sub> [M-I]<sup>+</sup> 565.3074, found 565.3078.

4,11-Bis(4-(tert-butyl)phenyl)-6-cyano-5-(2-hydroxyethyl)imidazo[1',2':1,6]pyrido[3,4-e]imidazo[1,2-a]pyrazin-5-ium iodide (**5f**)

Following the general procedures, **3h** and 2-iodoethan-1-ol were used as starting materials and **5f** was obtained as yellow solid, yield 92%. <sup>1</sup>H NMR (500 MHz, CDCl<sub>3</sub>): δ 8.73 (2H, d, *J* = 8.5 Hz), 8.40 (1H, d, *J* = 2.5 Hz), 8.31 (1H, d, *J* = 2.0 Hz), 7.78 (2H, d, *J* = 8.0 Hz), 7.74 (2H, d, *J* = 8.5 Hz), 7.60 (2H, d, *J* = 8.5 Hz), 7.48 (1H, d, *J* = 1.5 Hz), 6.45 (1H, d, *J* = 1.5 Hz), 3.79 (2H, t, *J* = 5.0 Hz), 3.66 (1H, t, *J* = 6.5 Hz), 3.54–3.51 (2H, m), 1.44 (9H, s), 1.38 (9H, s); <sup>13</sup>C NMR (125 MHz, CDCl<sub>3</sub>): δ 156.82, 156.66, 156.23, 138.17, 136.26, 135.33, 134.33, 132.37, 131.12, 130.98, 130.15, 130.09, 127.76, 125.78, 125.25, 118.50, 117.63, 113.69, 111.01, 110.46, 58.86, 53.28, 35.41, 35.22, 31.33, 31.11; HRMS (ESI) *m/z* calcd. for C<sub>34</sub>H<sub>35</sub>IN<sub>6</sub>O [M-I]<sup>+</sup> 543.2867, found 543.2875.

2-(4,11-Bis(4-(tert-butyl)phenyl)-6-cyanoimidazo[1',2':1,6]pyrido[3,4-e]imidazo[1,2-a]pyrazin-5-ium-5-yl)ethane-1-sulfonate (**5g**)

Following the general procedures, **3h** and 1,2-oxathiolane 2,2-dioxide were used as starting materials and **5g** was obtained as yellow solid, yield 88%. <sup>1</sup>H NMR (500 MHz, d<sub>6</sub>-DMSO): δ 8.79 (1H, d, *J* = 2.0 Hz), 8.75 (2H, d, *J* = 9.0 Hz), 8.73 (1H, d, *J* = 2.0 Hz), 7.88 (2H, d, *J* = 8.0 Hz), 7.77 (1H, d, *J* = 1.0 Hz), 7.72 (2H, d, *J* = 8.5 Hz), 7.65 (2H, d, *J* = 8.5 Hz), 6.55 (1H, d, *J* = 1.5 Hz), 3.72 (2H, t, *J* = 7.5 Hz), 2.02 (2H, t, *J* = 7.0 Hz), 1.81–1.76 (2H, m), 1.46 (9H, s), 1.38 (9H, s); <sup>13</sup>C NMR (125 MHz, d<sub>6</sub>-DMSO): δ 156.50, 155.80, 155.03, 138.29, 136.11, 135.25, 134.80, 132.67, 131.58, 131.24, 131.22, 130.91, 129.95, 129.90, 128.09, 126.13, 125.91, 118.98, 117.60, 115.44, 111.24, 110.87, 49.17, 48.01, 35.53, 35.42, 31.50, 31.33, 27.54; HRMS (ESI) *m/z* calcd. for C<sub>35</sub>H<sub>36</sub>N<sub>6</sub>O<sub>3</sub>S [M+H]<sup>+</sup> 621.2648, found 621.2649.

4,11-Bis(4-(tert-butyl)phenyl)-6-cyano-5-(2-oxopropyl)imidazo[1',2':1,6]pyrido[3,4-

e]imidazo[1,2-a]pyrazin-5-ium bromide (**5h**)

Following the general procedures, **3h** and 1-bromopropan-2-one were used as starting materials and **5h** was obtained as yellow solid, yield 85%. <sup>1</sup>H NMR (500 MHz, CDCl<sub>3</sub>): δ 9.03 (1H, d, *J* = 2.0 Hz), 8.75 (2H, d, *J* = 8.5 Hz), 8.53 (1H, d, *J* = 2.0 Hz), 7.73 (2H, d, *J* = 8.5 Hz), 7.61 (4H, d, *J* = 8.5 Hz), 7.48 (1H, d, *J* = 1.5 Hz), 6.44 (1H, d, *J* = 1.5 Hz), 5.39 (2H, s), 1.82 (3H, s), 1.45 (9H, s), 1.38 (9H, s); <sup>13</sup>C NMR (125 MHz, CDCl<sub>3</sub>): δ 200.01, 156.92, 156.32, 156.24, 138.12, 136.51, 135.44, 134.44, 132.20, 131.07, 130.99, 130.49, 130.02, 127.74, 125.81, 124.88, 118.43, 117.42, 113.97, 110.88, 110.38, 59.75, 35.38, 35.23, 31.31, 31.11, 26.88; HRMS (ESI) *m/z* calcd. for C<sub>35</sub>H<sub>35</sub>BrN<sub>6</sub>O [M-Br]<sup>+</sup> 555.2867, found 555.2871.

4,11-Bis(4-(tert-butyl)phenyl)-6-cyano-5-(2-ethoxy-2-oxoethyl)imidazo[1',2':1,6]pyrido[3,4-e]imidazo[1,2-a]pyrazin-5-ium bromide (**5i**)

Following the general procedures, **3h** and ethyl 2-bromoacetate were used as starting materials and **5i** was obtained as yellow solid, yield 87%. <sup>1</sup>H NMR (500 MHz, CDCl<sub>3</sub>): δ 9.20 (1H, s), 8.74 (2H, d, *J* = 8.5 Hz), 8.37 (1H, s), 7.73–7.78 (4H, m), 7.60 (2H, d, *J* = 8.5 Hz), 7.48 (1H, s), 6.42 (1H, s), 5.04 (2H, s), 4.04 (2H, q, *J* = 7.0 Hz), 1.46 (9H, s), 1.37 (9H, s), 1.19 (3H, t, *J* = 7.0 Hz); <sup>13</sup>C NMR (125 MHz, CDCl<sub>3</sub>): δ 166.88, 156.96, 156.45, 156.31, 138.14, 136.60, 135.50, 134.44, 132.76, 131.01, 130.30, 127.60, 125.82, 124.62, 118.46, 117.61, 113.51, 110.89, 110.33, 62.53, 51.57, 35.37, 35.23, 31.30, 31.10, 14.03; HRMS (ESI) *m/z* calcd. for C<sub>36</sub>H<sub>37</sub>BrN<sub>6</sub>O<sub>2</sub> [M-Br]<sup>+</sup> 585.2973, found 585.2980.

4,11-Bis(4-(tert-butyl)phenyl)-6-cyano-5-octadecylimidazo[1',2':1,6]pyrido[3,4-e]imidazo[1,2-a]pyrazin-5-ium iodide (**5j**)

Following the general procedures, **3h** and 1-iodooctadecane were used as starting materials and **5j** was obtained as yellow solid, yield 86%. <sup>1</sup>H NMR (500 MHz, CDCl<sub>3</sub>): δ 8.74 (2H, d, *J* = 8.5 Hz), 8.44 (2H, d, *J* = 8.0 Hz), 7.88 (2H, d, *J* = 8.0 Hz), 7.75 (2H, d, *J* = 8.0 Hz), 7.61 (1H, s), 7.60 (1H, s), 7.48 (1H, s), 6.46 (1H, s), 3.72 (2H, t, *J* = 8.0 Hz), 1.64–1.60 (2H, m), 1.45 (9H, s), 1.38 (9H, s), 1.25–1.10 (28H, m), 0.88–0.85 (5H, m); <sup>13</sup>C NMR (125 MHz, CDCl<sub>3</sub>): δ 156.78, 156.29, 156.10, 138.13, 136.04, 135.45, 134.28, 131.12, 130.98, 130.64, 130.15, 130.12, 127.67, 125.77, 125.53, 118.62, 117.78, 114.38, 110.79, 110.53, 50.88, 35.36, 35.21, 31.94, 31.33, 31.11, 31.01, 29.73, 29.71, 29.68, 29.51, 29.38, 28.94, 26.41, 22.71, 14.15; HRMS (ESI) *m/z* calcd. for C<sub>50</sub>H<sub>67</sub>IN<sub>6</sub> [M-I]<sup>+</sup> 751.5422, found 751.5431.

4,11-Bis(4-(tert-butyl)phenyl)-6-cyano-5-(4-(triphenylphosphonio)butyl)imidazo[1',2':1,6]pyrido[3,4-e]imidazo[1,2-a]pyrazin-5-ium iodide (**5k**)

Following the general procedures, **3h** and (4-iodobutyl)triphenylphosphonium iodide were used as starting materials and **5k** was obtained as yellow solid, yield 53%. <sup>1</sup>H NMR (500 MHz, CDCl<sub>3</sub>): δ 8.75 (2H, d, *J* = 8.5 Hz), 8.53 (1H, d, *J* = 2.0 Hz), 8.35 (1H, d, *J* = 2.0 Hz), 7.90 (2H, d, *J* = 8.5 Hz), 7.77 (2H, d, *J* = 8.5 Hz), 7.62 (2H, d, *J* = 8.5 Hz), 7.50 (1H, d, *J* = 1.0 Hz), 6.42 (1H, d, *J* = 1.5 Hz), 3.85 (2H, t, *J* = 5.5 Hz), 3.62 (4H, t, *J* = 4.5 Hz), 2.54 (2H, t, *J* = 5.5 Hz), 2.41–2.39 (4H, m), 1.46 (9H, s), 1.39 (9H, s); <sup>13</sup>C NMR (125 MHz, CDCl<sub>3</sub>): δ 156.94, 156.60, 156.26, 138.16, 136.21, 135.46, 134.39, 131.34, 131.06, 131.01, 130.27, 130.12, 127.90, 125.83, 125.58, 118.57, 117.70,

113.47, 110.76, 110.47, 66.86, 57.17, 53.32, 47.26, 35.42, 35.24, 31.35, 31.11; HRMS (ESI)  $m/z$  calcd. for  $C_{38}H_{42}IN_7$   $[M-I]^+$  612.3445, found 612.3452.

4,11-Bis(4-(tert-butyl)phenyl)-6-cyano-5-(2-morpholinoethyl)imidazo[1',2':1,6]pyrido[3,4-e]imidazo[1,2-a]pyrazin-5-ium iodide (**5l**)

Following the general procedures, **3h** and 4-(2-iodoethyl)morpholine were used as starting materials and **5l** was obtained as yellow solid, yield 61%.  $^1H$  NMR (500 MHz,  $CDCl_3$ ):  $\delta$  9.14 (1H, d,  $J$  = 1.0 Hz), 8.73 (2H, d,  $J$  = 8.5 Hz), 8.00 (1H, d,  $J$  = 1.5 Hz), 7.96 (2H, d,  $J$  = 8.5 Hz), 7.78–7.67 (17H, m), 7.59 (2H, d,  $J$  = 9.0 Hz), 7.48 (1H, d,  $J$  = 1.5 Hz), 6.50 (1H, d,  $J$  = 1.5 Hz), 4.11 (2H, t,  $J$  = 6.0 Hz), 3.41–3.35 (2H, m), 2.06–2.01 (2H, m), 1.82–1.76 (2H, m), 1.36 (9H, s), 1.36 (9H, s);  $^{13}C$  NMR (125 MHz,  $CDCl_3$ ):  $\delta$  156.68, 156.22, 156.16, 138.17, 136.45, 135.65, 135.14, 135.12, 134.28, 134.05, 133.97, 133.82, 133.74, 131.60, 131.20, 130.98, 130.72, 130.62, 130.51, 130.31, 130.25, 127.63, 125.71, 125.40, 118.58, 117.96, 117.87, 117.19, 112.59, 110.81, 110.53, 49.39, 35.32, 35.19, 31.37, 31.11, 29.69, 19.50, 19.48; HRMS (ESI)  $m/z$  calcd. for  $C_{54}H_{53}I_2N_6P$   $[M-2I]^{2+}$  408.2029, found 408.2030.

## V. The synthesis of the products 6

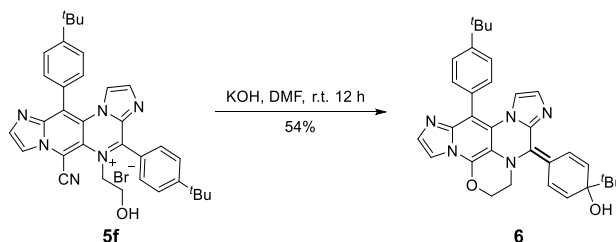

**Scheme S4.** Reaction procedure for **6**.

Compound **5f** (124 mg, 0.2 mmol, 1.0 equiv.), KOH (13 mg, 0.24 mmol, 1.2 eq) and 2.0 mL DMF was stirred at room temperature for 36 hours. After the reaction was completed, the reaction mixture was poured into water (10 mL) and extracted with EtOAc (3  $\times$  10 mL). The organic layer was dried over anhydrous  $Na_2SO_4$  and concentrated under reduced pressure. The residue was purified by column chromatography on silica gel ( $CHCl_3$  : MeOH = 20 : 1) to obtain the desired product **6** (light green solid, 56 mg, yield 54% (Scheme S4).  $^1H$  NMR (500 MHz,  $CDCl_3$ ):  $\delta$  8.68 (2H, d,  $J$  = 8.5 Hz), 7.60 (2H, d,  $J$  = 8.5 Hz), 7.49 (1H, d,  $J$  = 2.0 Hz), 7.26 (4H, s), 7.24 (1H, d,  $J$  = 1.5 Hz), 7.06 (1H, d,  $J$  = 2.5 Hz), 6.37 (1H, d,  $J$  = 1.0 Hz), 3.62 (2H, t,  $J$  = 4.0 Hz), 3.28 (2H, t,  $J$  = 4.0 Hz), 1.40 (9H, s), 1.32 (9H, s);  $^{13}C$  NMR (125 MHz,  $CDCl_3$ ):  $\delta$  153.65, 153.32, 152.74, 143.17, 139.15, 136.93, 133.28, 133.03, 132.52, 131.93, 129.38, 128.88, 126.01, 125.14, 125.05, 116.12, 114.50, 107.37, 89.60, 61.08, 51.63, 34.88, 34.85, 31.36, 31.35. HRMS (ESI)  $m/z$  calcd. for  $C_{33}H_{35}N_5O_2$   $[M+H]^+$  534.2869, found 534.2872.

## VI. Photophysical properties

**Table S2:** Optical properties of PPI (**2**).

| Compound  | $\lambda_{\text{max, abs}}^a$ | $\lambda_{\text{max, em}}$ |                          | Stokes shift <sup>d</sup> | FWHM <sup>e</sup> | Quantum yield ( $\Phi_f$ ) <sup>f</sup> |                          | $\alpha_{\text{AIE}}^g$ |
|-----------|-------------------------------|----------------------------|--------------------------|---------------------------|-------------------|-----------------------------------------|--------------------------|-------------------------|
|           |                               | Solution <sup>b</sup>      | Aggregation <sup>c</sup> |                           |                   | Solution <sup>b</sup>                   | Aggregation <sup>c</sup> |                         |
| <b>2a</b> | 371                           | 493                        | 487                      | 122                       | 85                | 12.5%                                   | 0.91%                    | 0.07                    |
| <b>2b</b> | 373                           | 487                        | 485                      | 114                       | 87                | 16.3%                                   | 1.26%                    | 0.08                    |
| <b>2c</b> | 378                           | 496                        | 484                      | 118                       | 86                | 11.4%                                   | 0.87%                    | 0.13                    |
| <b>2d</b> | 375                           | 498                        | 496                      | 123                       | 85                | 19.8%                                   | 2.15%                    | 0.11                    |
| <b>2e</b> | 387                           | 511                        | 501                      | 124                       | 97                | 21.6%                                   | 1.98%                    | 0.09                    |
| <b>2f</b> | 393                           | 531                        | 512                      | 138                       | 82                | 13.4%                                   | 1.31%                    | 0.10                    |
| <b>2g</b> | 381                           | 509                        | 499                      | 128                       | 84                | 15.6%                                   | 1.24%                    | 0.08                    |
| <b>2i</b> | 379                           | 496                        | 491                      | 117                       | 106               | 11.7%                                   | 0.65%                    | 0.06                    |
| <b>2j</b> | 376                           | 476                        | 473                      | 100                       | 94                | 10.9%                                   | 1.02%                    | 0.09                    |
| <b>2k</b> | 358                           | 474                        | 472                      | 116                       | 89                | 8.5%                                    | 0.33%                    | 0.04                    |

<sup>a</sup> UV absorption in dmso solution. <sup>b</sup> Solution of compounds in DMSO and <sup>c</sup> aggregation state of compounds in 95% water/DMSO mixture. <sup>d</sup> Calculated in solution. <sup>e</sup> FWHM, full width at half maxima, calculated in solution. <sup>f</sup> Absolute fluorescence quantum yield measured by calibrated integration. <sup>g</sup> The value was measure by intensity in aggregation/intnesity in solution. (10  $\mu\text{M}$ , nm).

**Table S3:** Optical properties of IPIP (**3**).

| Compound  | $\lambda_{\text{max, abs}}^a$ | $\lambda_{\text{max, em}}$ |                          | Stokes shift <sup>d</sup> | FWHM <sup>e</sup> | Quantum yield ( $\Phi_f$ ) <sup>f</sup> |                          | $\alpha_{\text{AIE}}^g$ |
|-----------|-------------------------------|----------------------------|--------------------------|---------------------------|-------------------|-----------------------------------------|--------------------------|-------------------------|
|           |                               | Solution <sup>b</sup>      | Aggregation <sup>c</sup> |                           |                   | Solution <sup>b</sup>                   | Aggregation <sup>c</sup> |                         |
| <b>3a</b> | 381                           | 549                        | 551, 575                 | 168                       | 70                | 10.8%                                   | 5.4%                     | 0.14                    |
| <b>3b</b> | 377                           | 552                        | 550                      | 175                       | 74                | 15.2%                                   | 6.8%                     | 0.21                    |
| <b>3c</b> | 373                           | 550                        | 551, 582                 | 177                       | 73                | 14.9%                                   | 8.3%                     | 0.10                    |
| <b>3d</b> | 376                           | 552                        | 550, 576                 | 176                       | 75                | 13.0%                                   | 6.9%                     | 0.13                    |
| <b>3e</b> | 379                           | 550                        | 552                      | 171                       | 71                | 17.1%                                   | 7.1%                     | 0.24                    |
| <b>3f</b> | 381                           | 550                        | 553                      | 169                       | 77                | 16.4%                                   | 10.3%                    | 0.17                    |
| <b>3g</b> | 401                           | 553                        | 557                      | 152                       | 76                | 11.3%                                   | 5.7%                     | 0.26                    |
| <b>3h</b> | 395                           | 551                        | 556                      | 156                       | 70                | 14.2%                                   | 7.5%                     | 0.35                    |
| <b>3i</b> | 393                           | 547                        | 552                      | 154                       | 73                | 12.2%                                   | 6.1%                     | 0.22                    |
| <b>3k</b> | 371                           | 541                        | 543, 557                 | 170                       | 68                | 16.8%                                   | 8.2%                     | 0.19                    |
| <b>3l</b> | 384                           | 540                        | 544, 561                 | 156                       | 69                | 15.4%                                   | 7.3%                     | 0.25                    |
| <b>3m</b> | 393                           | 561                        | 557                      | 168                       | 75                | 13.5%                                   | 6.9%                     | 0.13                    |

<sup>a</sup>UV absorption in DMSO solution. <sup>b</sup> Solution of compounds in DMSO and <sup>c</sup> aggregation state of compounds in 95% water/DMSO mixture. <sup>d</sup> Calculated in solution. <sup>e</sup> FWHM, full width at half maxima, calculated in solution. <sup>f</sup> Absolute fluorescence quantum yield measured by calibrated integration. <sup>g</sup> The value was measure by intensity in aggregation/intnesity in solution. (10  $\mu\text{M}$ , nm).

**Table S4:** Optical properties of IPIP-ND (**4** and **5**).

| Compound  | $\lambda_{\text{max, abs}}^a$ | $\lambda_{\text{max, em}}$ |                          | Stokes shift <sup>d</sup> | FWHM <sup>e</sup> | Quantum yield ( $\Phi_f$ ) <sup>f</sup> |                          | $\alpha_{\text{AIE}}^g$ |
|-----------|-------------------------------|----------------------------|--------------------------|---------------------------|-------------------|-----------------------------------------|--------------------------|-------------------------|
|           |                               | Solution <sup>b</sup>      | Aggregation <sup>c</sup> |                           |                   | Solution <sup>b</sup>                   | Aggregation <sup>c</sup> |                         |
| <b>4a</b> | 374                           | 511                        | 510                      | 137                       | 43                | 0.39%                                   | 15.2%                    | 36.56                   |
| <b>4b</b> | 371                           | 515                        | 511                      | 144                       | 44                | 0.78%                                   | 17.4%                    | 42.35                   |
| <b>4c</b> | 370                           | 512                        | 524                      | 142                       | 45                | 0.46%                                   | 18.8%                    | 46.17                   |
| <b>4d</b> | 374                           | 516                        | 513                      | 142                       | 47                | 0.76%                                   | 14.6%                    | 41.52                   |
| <b>4e</b> | 371                           | 529                        | 518                      | 158                       | 49                | 0.81%                                   | 14.9%                    | 30.58                   |
| <b>4f</b> | 374                           | 535                        | 532                      | 161                       | 43                | 0.56%                                   | 16.7%                    | 10.49                   |
| <b>4g</b> | 371                           | 523                        | 521                      | 152                       | 43                | 1.07%                                   | 19.5%                    | 28.96                   |
| <b>5a</b> | 374                           | 527                        | 525                      | 153                       | 43                | 1.26%                                   | 12.8%                    | 10.77                   |
| <b>5b</b> | 371                           | 531                        | 528                      | 160                       | 43                | 0.94%                                   | 15.6%                    | 10.65                   |
| <b>5c</b> | 373                           | 533                        | 532                      | 160                       | 47                | 0.37%                                   | 17.2%                    | 13.44                   |
| <b>5d</b> | 374                           | 534                        | 531                      | 160                       | 43                | 0.42%                                   | 15.9%                    | 12.48                   |
| <b>5e</b> | 371                           | 532                        | 525                      | 160                       | 42                | 0.32%                                   | 14.5%                    | 13.58                   |
| <b>5f</b> | 375                           | 531                        | 523                      | 157                       | 43                | 0.63%                                   | 16.7%                    | 12.49                   |
| <b>5g</b> | 375                           | 530                        | 522                      | 155                       | 44                | 0.17%                                   | 19.3%                    | 11.49                   |
| <b>5h</b> | 374                           | 531                        | 530                      | 157                       | 43                | 0.43%                                   | 18.5%                    | 12.53                   |
| <b>5i</b> | 373                           | 533                        | 528                      | 160                       | 43                | 0.25%                                   | 19.1%                    | 13.82                   |
| <b>5j</b> | 374                           | 534                        | 526                      | 160                       | 44                | 0.78%                                   | 15.4%                    | 14.37                   |
| <b>5k</b> | 372                           | 531                        | 529                      | 159                       | 43                | 0.91%                                   | 16.1%                    | 15.36                   |
| <b>5l</b> | 369                           | 535                        | 525                      | 166                       | 46                | 0.93%                                   | 11.2%                    | 21.29                   |

<sup>a</sup> UV absorption in solution. <sup>b</sup> Solution of compounds in DMSO and <sup>c</sup> aggregation state of compounds in 95% water/DMSO mixture. <sup>d</sup> Calculated in aggregation state. <sup>e</sup> FWHM, full width at half maxima, calculated in aggregation. <sup>f</sup> Absolute fluorescence quantum yield measured by calibrated integration. <sup>g</sup> Intensity in aggregation/intensity in solution. (10  $\mu\text{M}$ , nm).

**Table S5.** Optical properties of **2c**, **3c** and **4c** in different state.

| Compound  | $\lambda_{\text{abs}}^a$ (nm) | $\lambda_{\text{em}}$ (nm)                                                | Quantum yield ( $\Phi_f$ ) <sup>f</sup>                                        | Lifetimes ( $\tau$ , ns)                                                      |
|-----------|-------------------------------|---------------------------------------------------------------------------|--------------------------------------------------------------------------------|-------------------------------------------------------------------------------|
| <b>2c</b> | 378                           | 496, 484                                                                  | 11.4% <sup>b</sup> , 0.87% <sup>c</sup>                                        | 4.58 <sup>b</sup> , 2.31 <sup>c</sup> ,                                       |
| <b>3c</b> | 373                           | 550 <sup>b</sup> , 551 <sup>c</sup> , 567 <sup>d</sup> , 584 <sup>e</sup> | 14.9% <sup>b</sup> , 8.3% <sup>c</sup> , 7.2% <sup>d</sup> , 6.1% <sup>e</sup> | 4.22 <sup>b</sup> , 5.71 <sup>c</sup> , 7.33 <sup>d</sup> , 3.61 <sup>e</sup> |
| <b>4c</b> | 370                           | 512 <sup>b</sup> , 524 <sup>c</sup>                                       | 0.46% <sup>b</sup> , 18.8% <sup>c</sup> , 0.58% <sup>d</sup>                   | 5.59 <sup>b</sup> , 6.02 <sup>c</sup> , 2.03 <sup>e</sup>                     |

<sup>a</sup> UV absorption in DMSO solution. <sup>b</sup> Calculated in DMSO solution, <sup>c</sup> in aggregation, <sup>d</sup> in solid, and <sup>e</sup> in crystal state for **2c**, **3c**, **4c**. <sup>f</sup> Absolute fluorescence quantum yield measured by calibrated integration. (concentration: 10  $\mu\text{M}$ ).

**Table S6.** Optical properties **2c**, **3c**, **3h**, **4c**, **4h**, **5i**, and **6** in different solvents.<sup>a</sup>

| Compound  |                             | PET | Toluene | THF | CHCl <sub>3</sub> | Dioxane | Acetone | CH <sub>3</sub> CN | MeOH | DMSO |
|-----------|-----------------------------|-----|---------|-----|-------------------|---------|---------|--------------------|------|------|
| <b>2c</b> | $\lambda_{\text{max, abs}}$ | 376 | 378     | 377 | 379               | 375     | 376     | 375                | 375  | 378  |
|           | $\lambda_{\text{max, em}}$  | 583 | 470     | 490 | 471               | 472     | 493     | 493                | 475  | 496  |
|           | Stokes shift                | 207 | 92      | 113 | 92                | 97      | 117     | 118                | 100  | 118  |
|           | FWHM                        | 57  | 87      | 89  | 86                | 89      | 86      | 87                 | 90   | 86   |
| <b>3c</b> | $\lambda_{\text{max, abs}}$ | 386 | 402     | 396 | 382               | 406     | 391     | 393                | 385  | 373  |
|           | $\lambda_{\text{max, em}}$  | 517 | 527     | 537 | 518               | 532     | 541     | 540                | 538  | 550  |
|           | Stokes shift                | 131 | 125     | 141 | 136               | 126     | 150     | 147                | 153  | 177  |
|           | FWHM                        | 68  | 65      | 67  | 65                | 67      | 67      | 68                 | 70   | 73   |
| <b>3h</b> | $\lambda_{\text{max, abs}}$ | 386 | 407     | 401 | 391               | 406     | 397     | 391                | 389  | 395  |
|           | $\lambda_{\text{max, em}}$  | 524 | 534     | 539 | 515               | 534     | 541     | 543                | 539  | 551  |
|           | Stokes shift                | 138 | 127     | 138 | 124               | 128     | 144     | 152                | 150  | 156  |
|           | FWHM                        | 81  | 73      | 74  | 77                | 73      | 72      | 72                 | 75   | 71   |
| <b>4c</b> | $\lambda_{\text{max, abs}}$ | 386 | 397     | 403 | 395               | 399     | 395     | 391                | 386  | 394  |
|           | $\lambda_{\text{max, em}}$  | 498 | 464     | 478 | 458               | 465     | 526     | 524                | 525  | 511  |
|           | Stokes shift                | 112 | 67      | 75  | 63                | 66      | 131     | 133                | 139  | 117  |
|           | FWHM                        | -   | 90      | 72  | -                 | 59      | 47      | 44                 | 46   | -    |
| <b>4h</b> | $\lambda_{\text{max, abs}}$ | 375 | 385     | 396 | 387               | 391     | 374     | 381                | 385  | 374  |
|           | $\lambda_{\text{max, em}}$  | 492 | 469     | 472 | 469               | 470     | 533     | 533                | 533  | 539  |
|           | Stokes shift                | 117 | 84      | 76  | 82                | 79      | 159     | 152                | 148  | 165  |
|           | FWHM                        | -   | -       | 70  | -                 | 60      | 54      | 50                 | 54   | -    |
| <b>5i</b> | $\lambda_{\text{max, abs}}$ | 376 | 387     | 391 | 382               | 395     | 377     | 376                | 379  | 369  |
|           | $\lambda_{\text{max, em}}$  | 498 | 465     | 473 | 463               | 470     | 535     | 535                | 534  | 537  |
|           | Stokes shift                | 122 | 78      | 82  | 81                | 75      | 158     | 159                | 155  | 168  |
|           | FWHM                        | -   | 87      | 70  | -                 | 61      | 52      | 48                 | 44   | 47   |
| <b>6</b>  | $\lambda_{\text{max, abs}}$ | 366 | 384     | 392 | 381               | 389     | 375     | 373                | 377  | 371  |
|           | $\lambda_{\text{max, em}}$  | 471 | 475     | 485 | 483               | 469     | 493     | 491                | 501  | 496  |
|           | Stokes shift                | 105 | 91      | 93  | 102               | 80      | 118     | 118                | 124  | 125  |
|           | FWHM                        | -   | 60      | 64  | 65                | 59      | 69      | 65                 | 70   | 60   |

<sup>a</sup> The UV absorption and the emission spectra was measured in solution (10  $\mu$ M, nm).

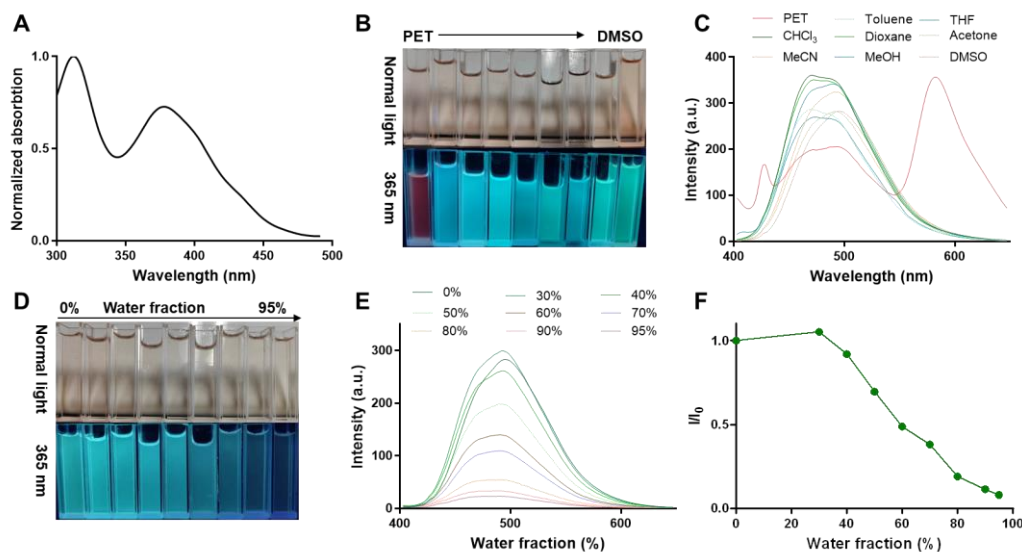

**Figure S1.** Luminescence properties of **2c**. (A) Absorption of **2c** in DMSO; (B) Photos of **2c** in various solvents under 365 nm UV light (up) and normal light (down), from left to right: PET, toluene, THF, chloroform, dioxane, acetone, acetonitrile, methanol, DMSO; (C) Emission spectra of **2c** in different solvents; (D) Photos of **2c** in different water fractions (DMSO/water) under 365 nm UV light (up) and under normal light (down); (E) Emission spectra of **2c** in different water fractions (DMSO/water mixture); (F) Plots of emission intensity of **2c** (497 nm) in different water fractions. (concentration: 10  $\mu$ M).

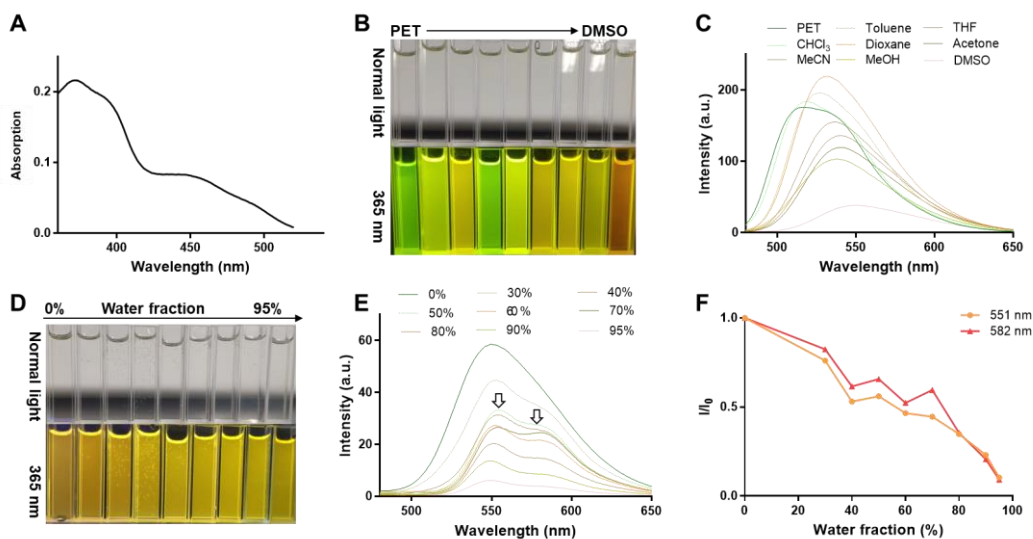

**Figure S2.** Luminescence properties of **3c**. (A) Absorption of **3c** in DMSO; (B) Photos of **3c** in various solvents under 365 nm UV light (up) and normal light (down), from left to right: PET, toluene, THF, chloroform, dioxane, acetone, acetonitrile, methanol, DMSO; (C) Emission spectra of **3c** in different solvents; (D) Photos of **3c** in different water fractions (DMSO/water) under 365 nm UV light (up) and under normal light (down); (E) Emission spectra of **3c** in different water fractions (DMSO/water mixture); (F) Plots of emission intensity of **3c** (551 and 582 nm) in different water fractions. (concentration: 10  $\mu$ M).

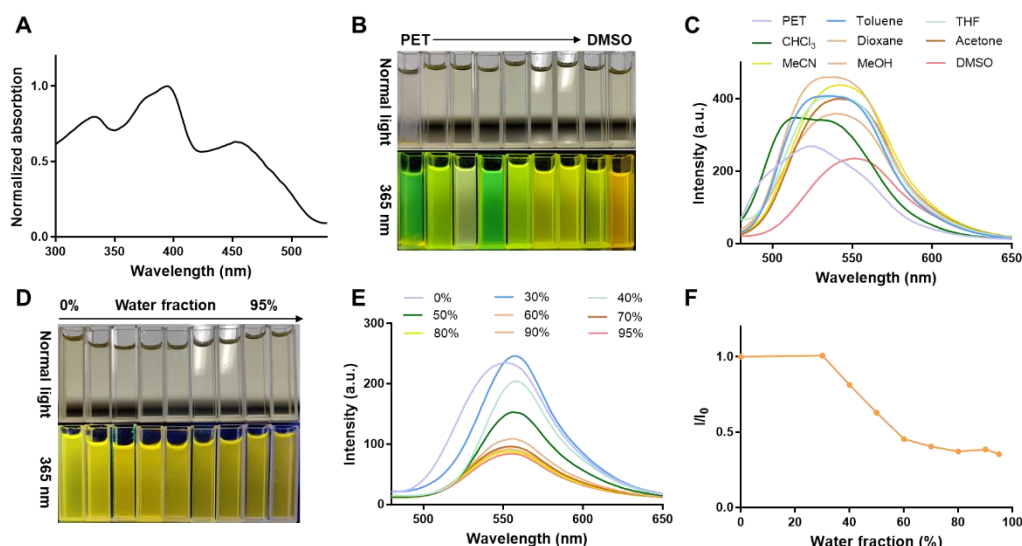

**Figure S3.** Luminescence properties of **3h**. (A) Absorption of **3h** in DMSO; (B) Photos of **3h** in various solvents under 365 nm UV light (up) and normal light (down), from left to right: PET, toluene, THF, chloroform, dioxane, acetone, acetonitrile, methanol, DMSO; (C) Emission spectra of **3h** in different solvents; (D) Photos of **3h** in different water fractions (DMSO/water) under 365 nm UV light (up) and under normal light (down); (E) Emission spectra of **3h** in different water fractions (DMSO/water mixture); (F) Plots of emission intensity of **3h** (551 nm) in different water fractions. (concentration: 10  $\mu$ M).

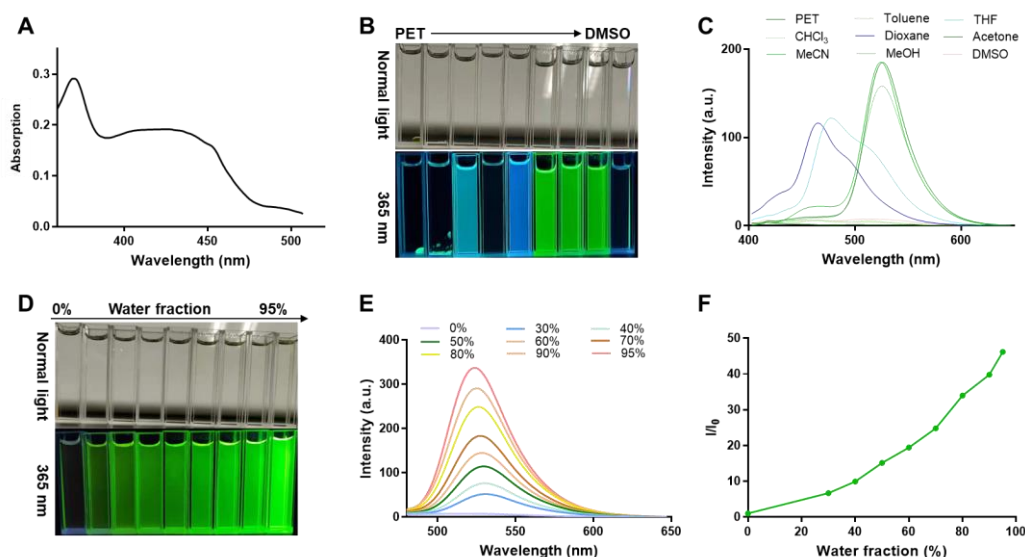

**Figure S4.** Luminescence properties of **4c**. (A) Absorption of **4c** in DMSO; (B) Photos of **4c** in various solvents under 365 nm UV light (up) and normal light (down), from left to right: PET, toluene, THF, chloroform, dioxane, acetone, acetonitrile, methanol, DMSO; (C) Emission spectra of **4c** in different solvents; (D) Photos of **4c** in different water fractions (DMSO/water) under 365 nm UV light (up) and under normal light (down); (E) Emission spectra of **4c** in different water fractions (DMSO/water mixture); (F) Plots of emission intensity of **4c** (524 nm) in different water fractions. (concentration: 10  $\mu$ M).

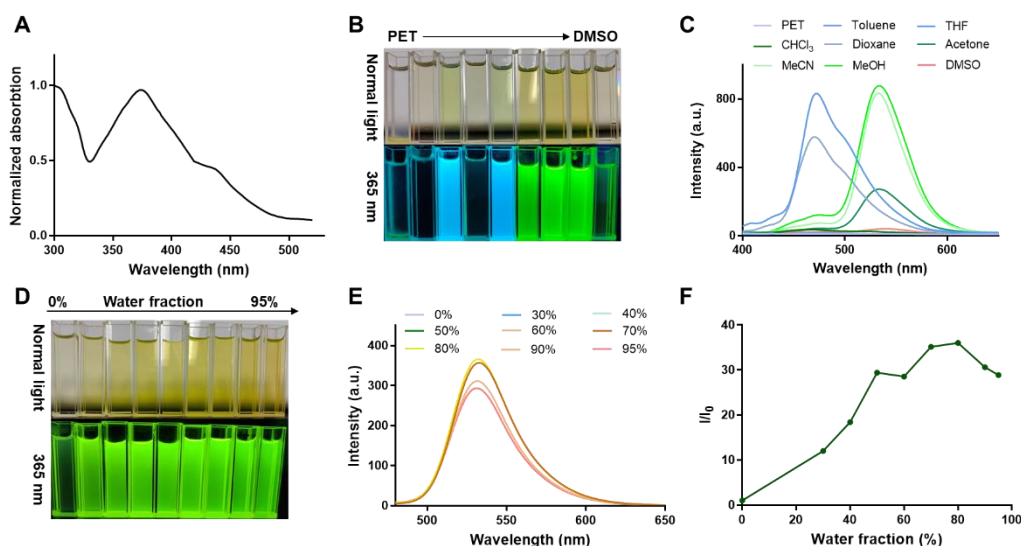

**Figure S5.** Luminescence properties of **4f**. (A) Absorption of **4f** in DMSO; (B) Photos of **4f** in various solvents under 365 nm UV light (up) and normal light (down), from left to right: PET, toluene, THF, chloroform, dioxane, acetone, acetonitrile, methanol, DMSO; (C) Emission spectra of **4f** in different solvents; (D) Photos of **4f** in different water fractions (DMSO/water) under 365 nm UV light (up) and under normal light (down); (E) Emission spectra of **4f** in different water fractions (DMSO/water mixture); (F) Plots of emission intensity of **4f** (520 nm) in different water fractions. (concentration: 10  $\mu$ M).

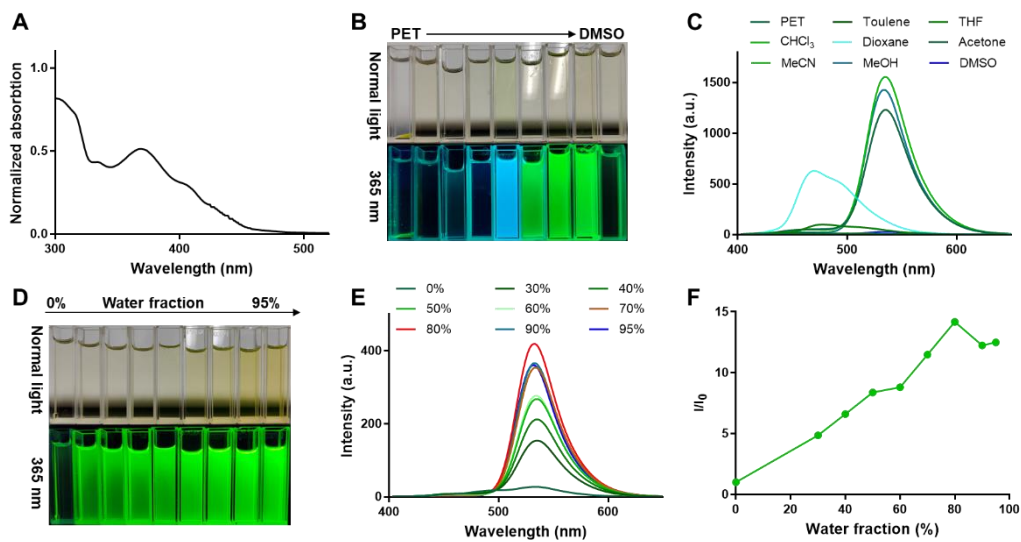

**Figure S6.** Luminescence properties of **5f**. (A) Absorption of **5f** in DMSO; (B) Photos of **5f** in various solvents under 365 nm UV light (up) and normal light (down), from left to right: PET, toluene, THF, chloroform, dioxane, acetone, acetonitrile, methanol, DMSO; (C) Emission spectra of **5f** in different solvents; (D) Photos of **5f** in different water fractions (DMSO/water) under 365 nm UV light (up) and under normal light (down); (E) Emission spectra of **5f** in different water fractions (DMSO/water mixture); (F) Plots of emission intensity of **5f** (531 nm) in different water fractions. (concentration: 10  $\mu$ M).

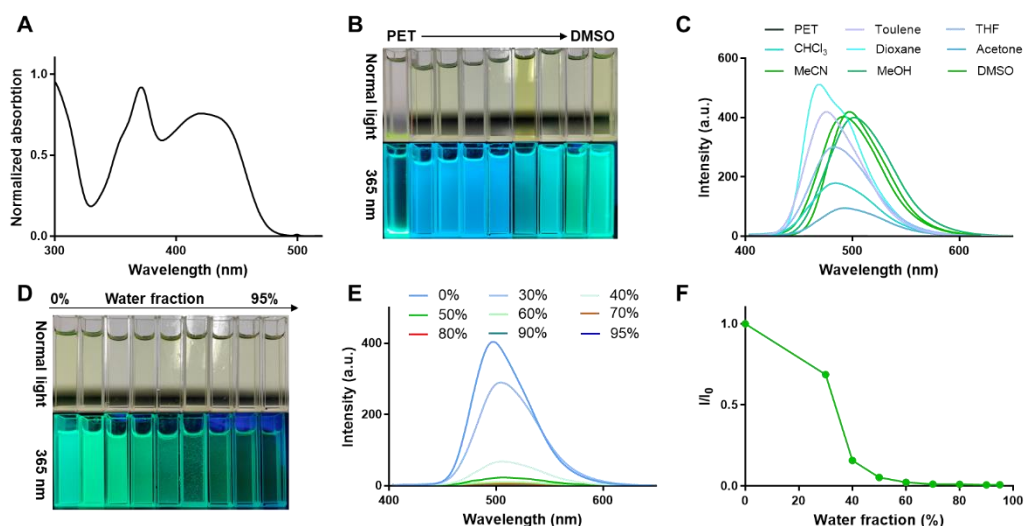

**Figure S7.** Luminescence properties of **6**. (A) Absorption of **6** in DMSO; (B) Photos of **6** in various solvents under 365 nm UV light (up) and normal light (down), from left to right: PET, toluene, THF, chloroform, dioxane, acetone, acetonitrile, methanol, DMSO; (C) Emission spectra of **6** in different solvents; (D) Photos of **6** in different water fractions (DMSO/water) under 365 nm UV light (up) and under normal light (down); (E) Emission spectra of **6** in different water fractions (DMSO/water mixture); (F) Plots of emission intensity of **6** (497 nm) in different water fractions. (concentration: 10  $\mu$ M).

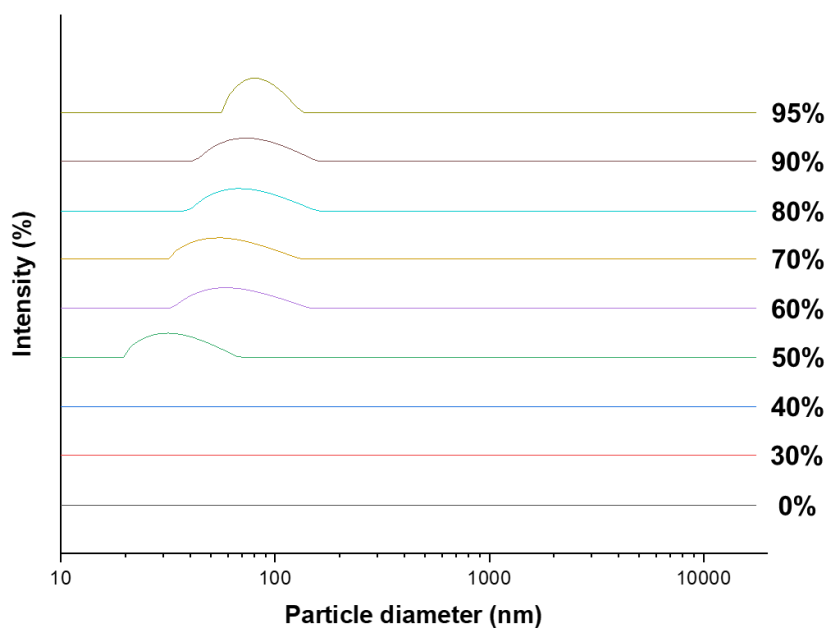

**Figure S8.** DLS size distribution of **2c** in different water fraction (DMSO/water mixture, concentration: 10  $\mu$ M).

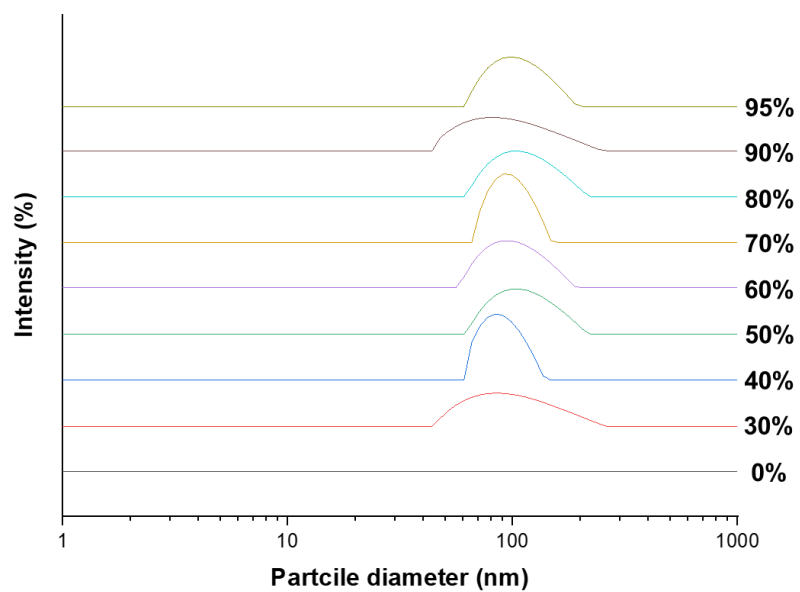

**Figure S9.** DLS size distribution of **3c** in different water fraction (DMSO/water mixture, concentration: 10  $\mu$ M).

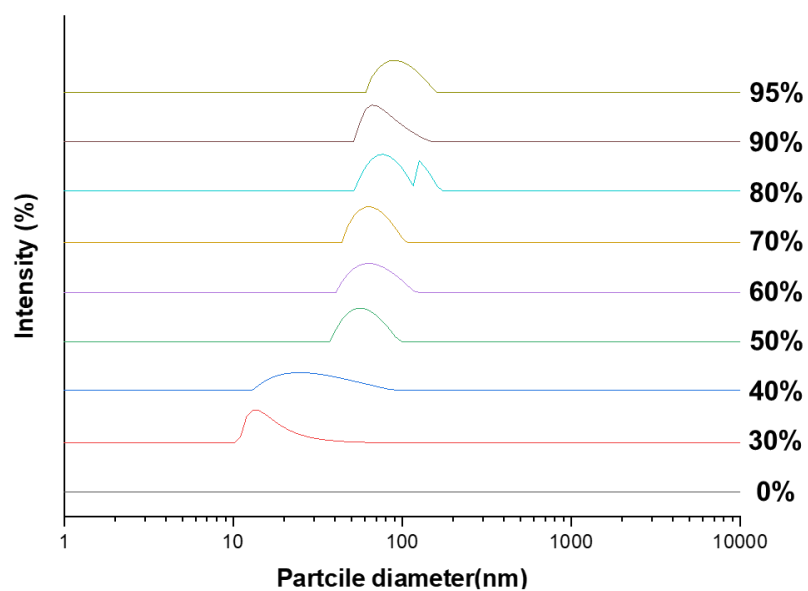

**Figure S10.** DLS size distribution of **4c** in different water fraction (DMSO/water mixture, concentration: 10  $\mu$ M).

## VII. Cell culture and cytotoxicity

**Cell culture:** Hela cells were seeded in 96-well plate at the density of  $1 \times 10^5$  cells per well with Dulbecco's Modified Eagle Medium (DMEM) containing 10% fetal bovine serum (FBS) and a mixture of 0.1 mg/mL streptomycin and 100 units/mL penicillin, and then allowed to attach overnight at 37 °C under 5% CO<sub>2</sub>. Hela cells were incubated with **3h**, **5j**, **5k**, and **5l** in different concentrations for 24 h. MTT solution (5 mg·mL<sup>-1</sup>) was added to each well for 4 hours at 37 °C. Then 100 µL DMSO was added to each well in order to dissolve the formazan crystals. The absorbance of solution in each well was measured by microplate reader at 570 nm. Cell viability was calculated in reference to negative cells without exposure to test agents. All of experiments were repeated thrice (Figure S11).

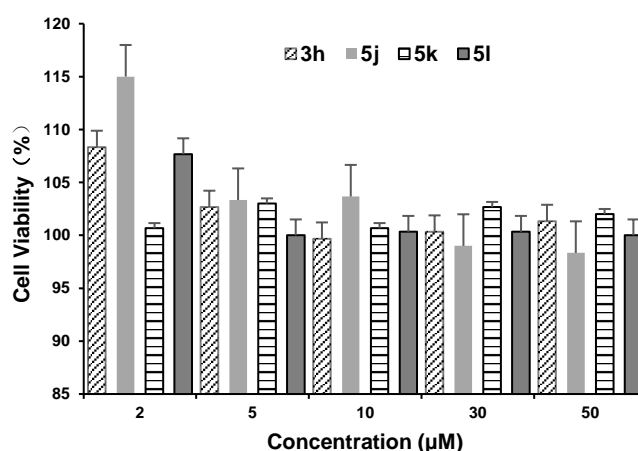

**Figure S11.** MTT assay of Hela incubation (12 h) with **3h**, **5j**, **5k**, and **5l** at different concentrations

**Co-localization tests of 3h and Nile Red in lipid droplets imaging:** Hela cells were seeded in glass bottom cell culture dishes at the density of  $1 \times 10^5$  cells per dish with Dulbecco's Modified Eagle Medium (DMEM) containing 10% fetal bovine serum (FBS) and a mixture of 0.1 mg/mL streptomycin and 100 units/mL penicillin, and then allowed to attach overnight at 37 °C under 5% CO<sub>2</sub>. Hela cells were incubated with oleic acid (0.78 mM) for 4 h, and then stained with **3h** (10 µM) and Nile Red (5 µM) for 1 h, which were washed twice with PBS and imaged by a confocal microscope..

**Co-localization tests of 5j and DiI in cell membrane imaging:** Hela cells were seeded in glass bottom cell culture dishes at the density of  $1 \times 10^5$  cells per dish with Dulbecco's Modified Eagle Medium (DMEM) containing 10% fetal bovine serum (FBS) and a mixture of 0.1 mg/mL streptomycin and 100 units/mL penicillin, and then allowed to attach overnight at 37 °C under 5% CO<sub>2</sub>. Hela cells were incubated with **5j** (10 µM) and DiI (1 µM) for 15 min, which were washed twice with PBS and imaged by a confocal microscope..

**Co-localization tests of 5k and Mito-tracker Red in mitochondrion imaging:** Hela cells were seeded in glass bottom cell culture dishes at the density of  $1 \times 10^5$  cells per dish with Dulbecco's Modified Eagle Medium (DMEM) containing 10% fetal bovine serum (FBS) and a mixture of 0.1 mg/mL streptomycin and 100 units/mL penicillin, and then allowed to attach overnight at 37 °C under 5% CO<sub>2</sub>. Hela cells were incubated with **5k** (10 µM) and Mito-tracker Red (1 µM) for 2 h, which were washed twice with PBS and imaged by a confocal microscope..

**Co-localization tests of **51** and Lyso-tracker Red in lysosome imaging:** Hela cells were seeded in glass bottom cell culture dishes at the density of  $1 \times 10^5$  cells per dish with Dulbecco's Modified Eagle Medium (DMEM) containing 10% fetal bovine serum (FBS) and a mixture of 0.1 mg/mL streptomycin and 100 units/mL penicillin, and then allowed to attach overnight at 37 °C under 5% CO<sub>2</sub>. Hela cells were incubated with **51** (10 μM) and Lyso-tracker Red (1 μM) for 1 h, which were washed twice with PBS and imaged by a confocal microscope..

## VIII. References

1. M. Milen, T. Földesi, A. Dancsó, G. Simig, B. Volk, Synthesis of three new tricyclic ring systems: pyrrolotriazepines condensed with an imidazole, a triazole, or a tetrazole ring. *Synlett* **2015**, 26, 2418–2424.
2. J. Guo, F. Zhao, W. Yin, M. Zhu, C. Hao, Y. Pang, T. Wu, J. Wang, D. Zhao, H. Li, M. Cheng, Design, synthesis, structure-activity relationships study and X-ray crystallography of 3-substituted-indolin-2-one-5-carboxamide derivatives as PAK4 inhibitors, *Eur. J. Med. Chem.* **2018**, 155, 197–209.
3. C. He, Z. Wang , Y. Chen, G. Zhang, Y. Yu, Palladium(II)-catalyzed C(sp)-C(sp<sup>2</sup>) coupling: a direct approach to multi-substituted pyrrolo[1,2-a]pyrazines, *Synthesis* 2021, 53, 2051–2056.
4. H. H. Seltzman, C. Shiner, E. E. Hirt, A. F. Gilliam, B. F. Thomas, R. Maitra, R. Snyder, S. L. Black, P. R. Patel, Y. Mulpuri, I. Spigelman, Peripherally selective cannabinoid 1 receptor (CB1R) agonists for the treatment of neuropathic pain, *J. Med. Chem.* **2016**, 59, 7525–7543
5. X. C. Chen, G. X. Tang, W. H. Luo, W. Shao, J. Dai, S. T. Zeng, Z. S. Huang, S. B. Chen, J. H. Tan, Monitoring and modulating mtDNA G-quadruplex dynamics reveal its close relationship to cell glycolysis, *J. Am. Chem. Soc.* **2021**, 143, 20779–20791.

## IX. NMR spectroscopic data

### 4,11-Diphenylpyrro[1',2':4,5]pyrazino[2,3-f]indolizine-6-carbonitrile (2a)

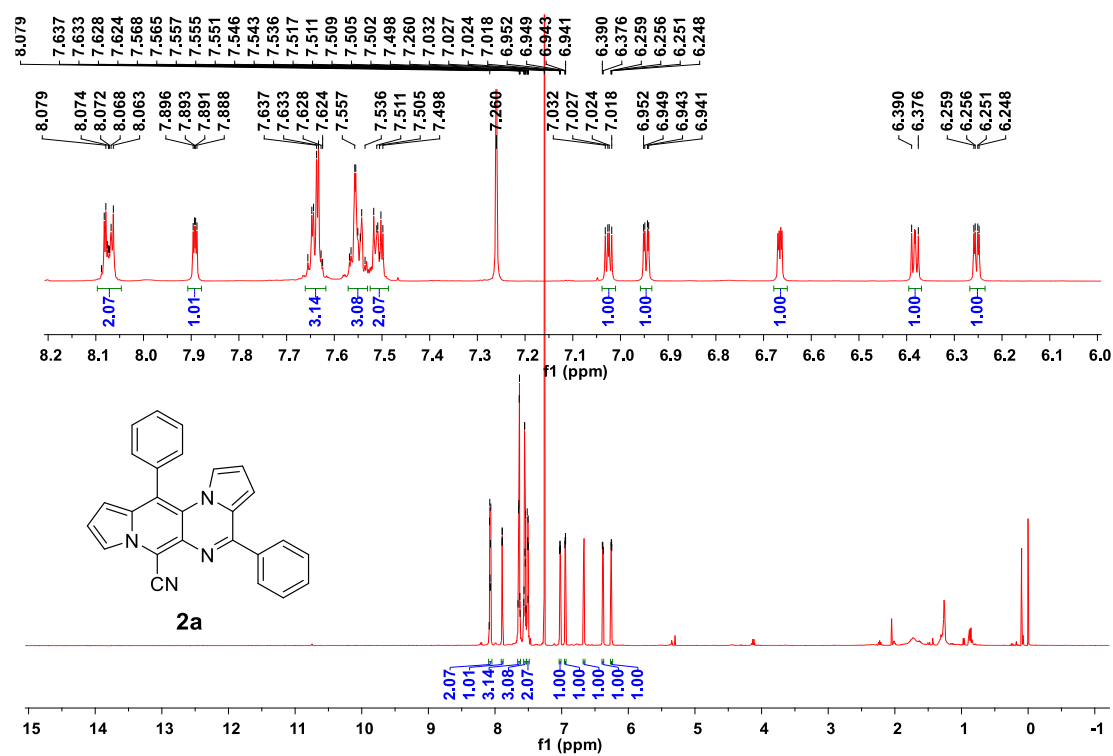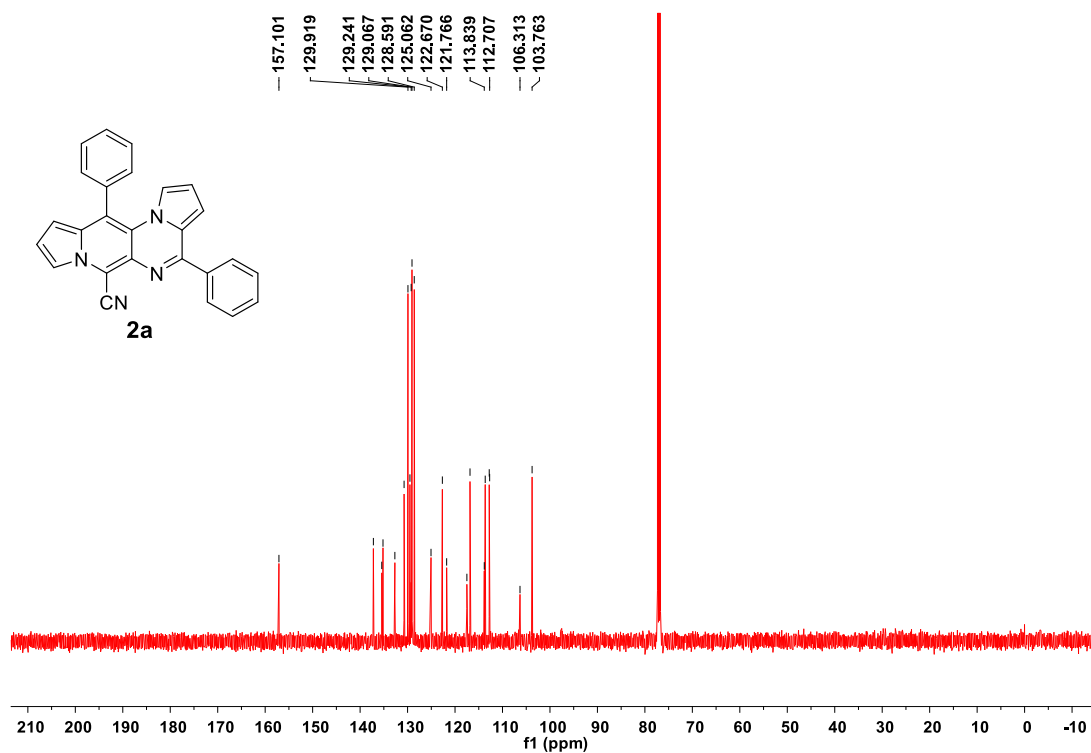

**4,11-Bis(4-fluorophenyl)pyrrolo[1',2':4,5]pyrazino[2,3-f]indolizine-6-carbonitrile (2b)**

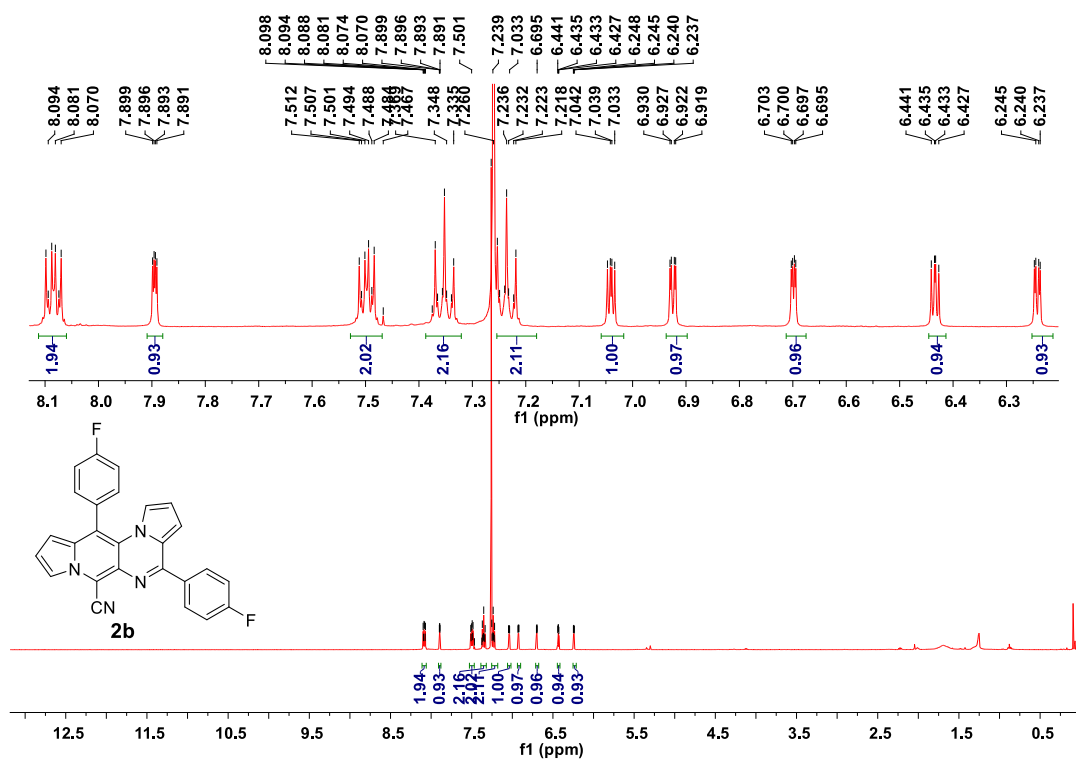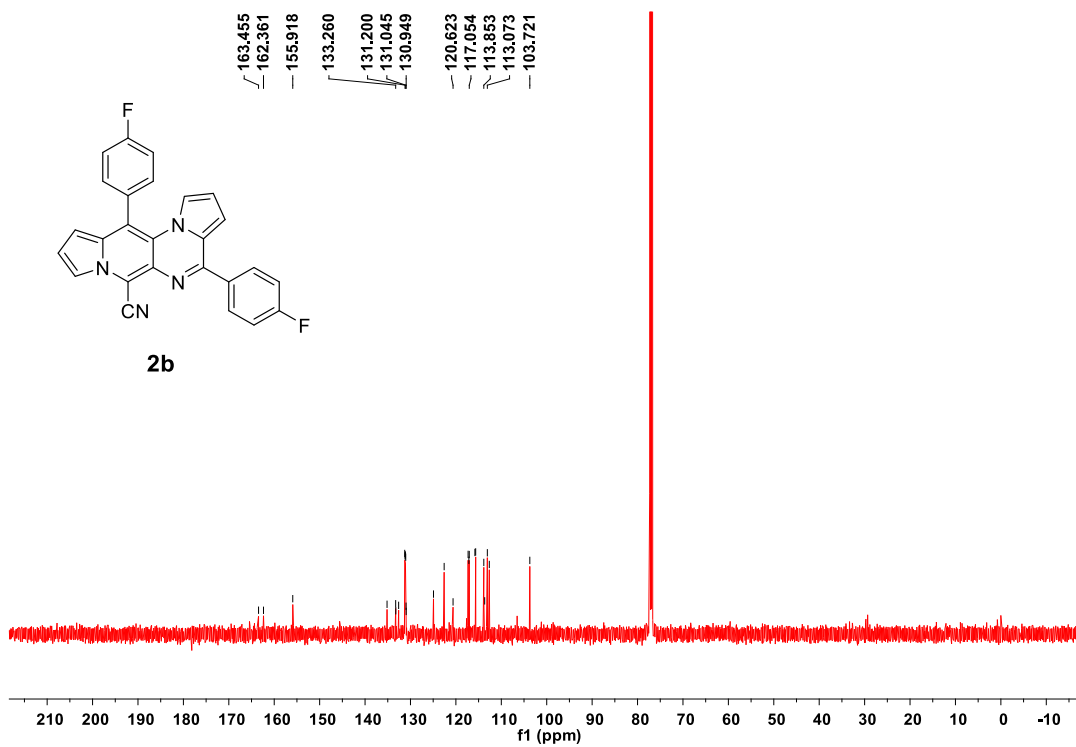

Chemical structure of **2c** is shown. The structure is a pyrazolo[1,5-a]pyridine derivative with a 4-chlorophenyl group at position 2, a 4-chlorophenyl group at position 3, and a cyano group at position 4.

<sup>1</sup>H NMR spectrum (400 MHz, CDCl<sub>3</sub>) is shown. The x-axis is labeled f1 (ppm) and ranges from 6.2 to 7.9. The spectrum displays several multiplets and doublets, with peak labels and integrations provided.

<sup>13</sup>C NMR spectrum (100 MHz, CDCl<sub>3</sub>) is shown. The x-axis is labeled f1 (ppm) and ranges from 0 to 15. The spectrum displays several sharp peaks, with peak labels and integrations provided.

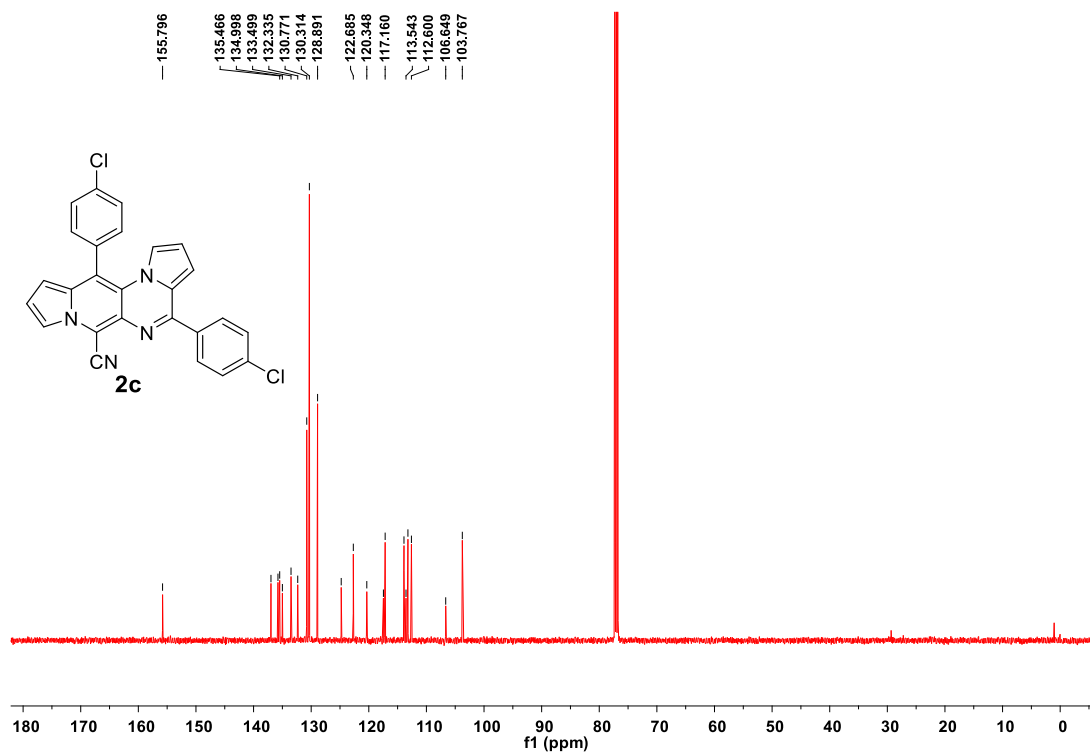

**4,11-Bis(4-bromophenyl)pyrrolo[1',2':4,5]pyrazino[2,3-f]indolizine-6-carbonitrile (2d)**

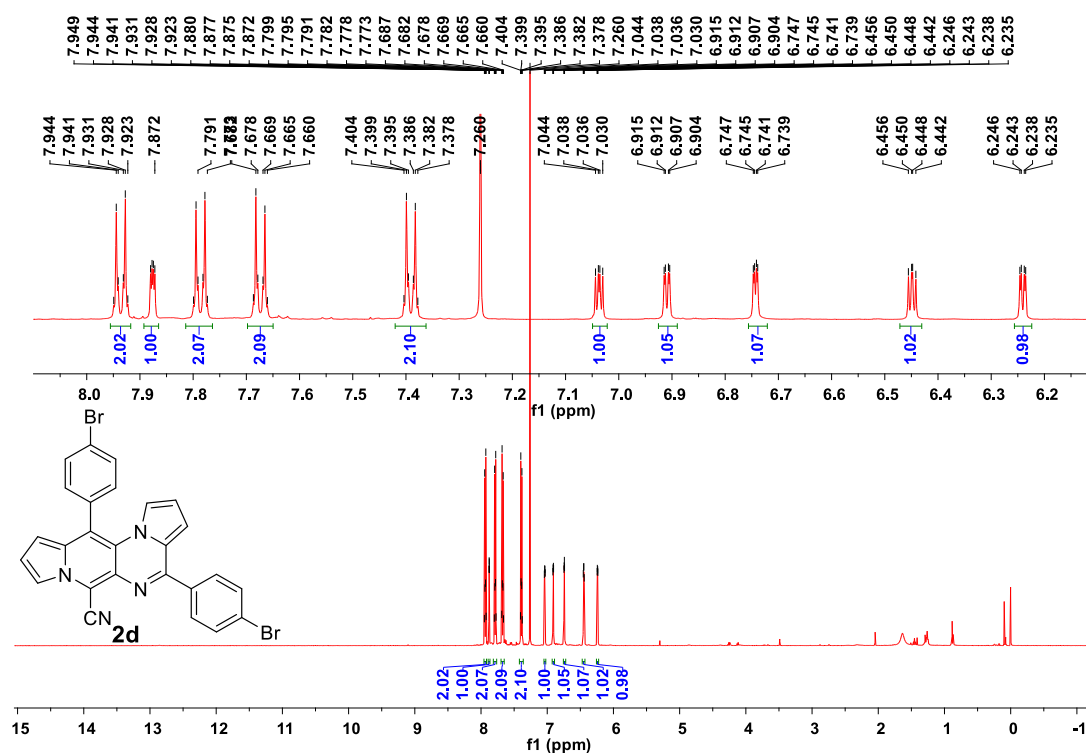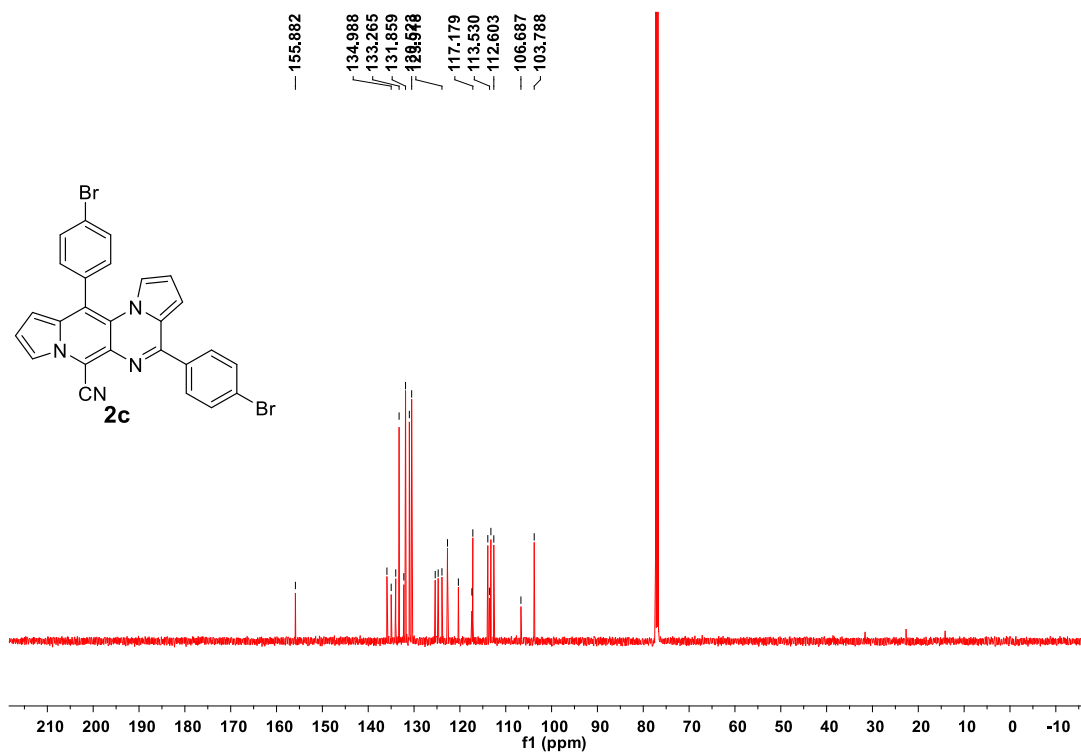

**4,11-Di-p-tolylpyrrolo[1',2':4,5]pyrazino[2,3-f]indolizine-6-carbonitrile (2e)**

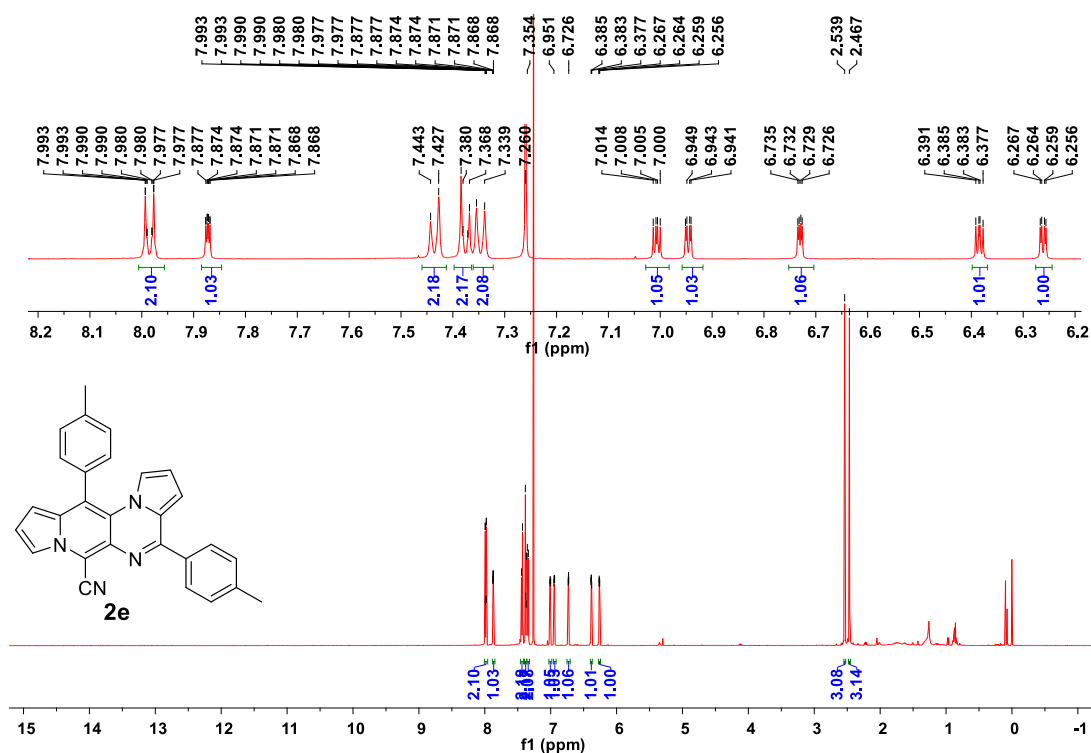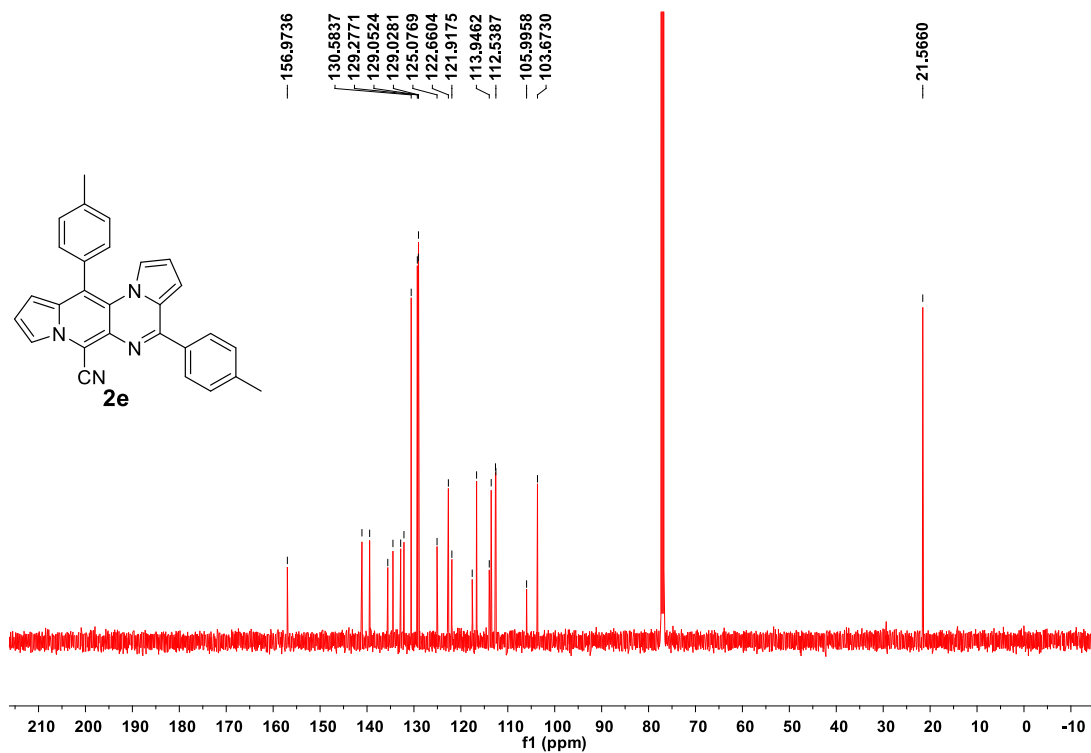

**4,11-Bis(4-methoxyphenyl)pyrrolo[1',2':4,5]pyrazino[2,3-f]indolizine-6-carbonitrile (2f)**

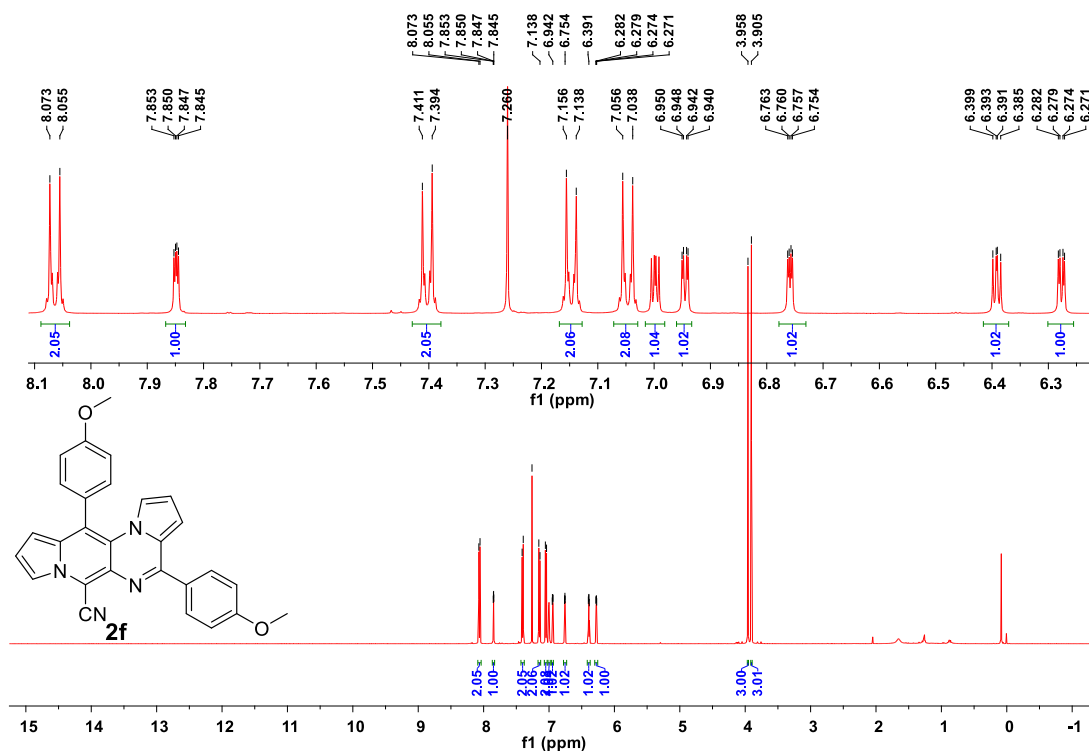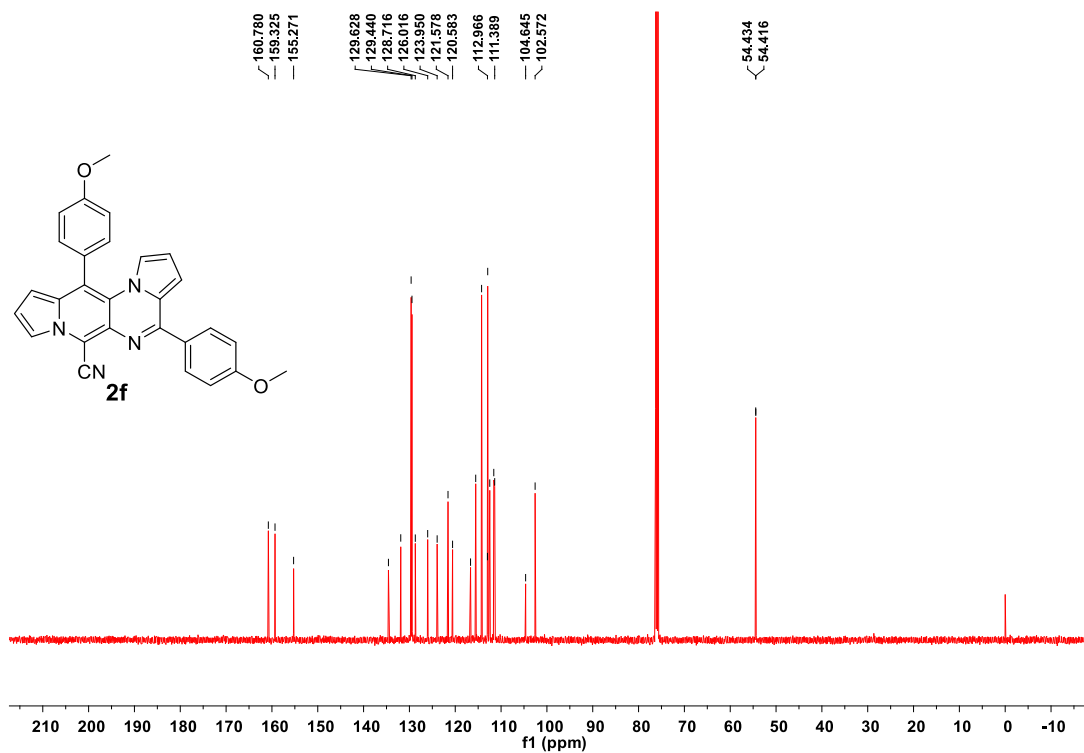

**4,11-Di-o-tolylpyrrolo[1',2':4,5]pyrazino[2,3-f]indolizine-6-carbonitrile (2g)**

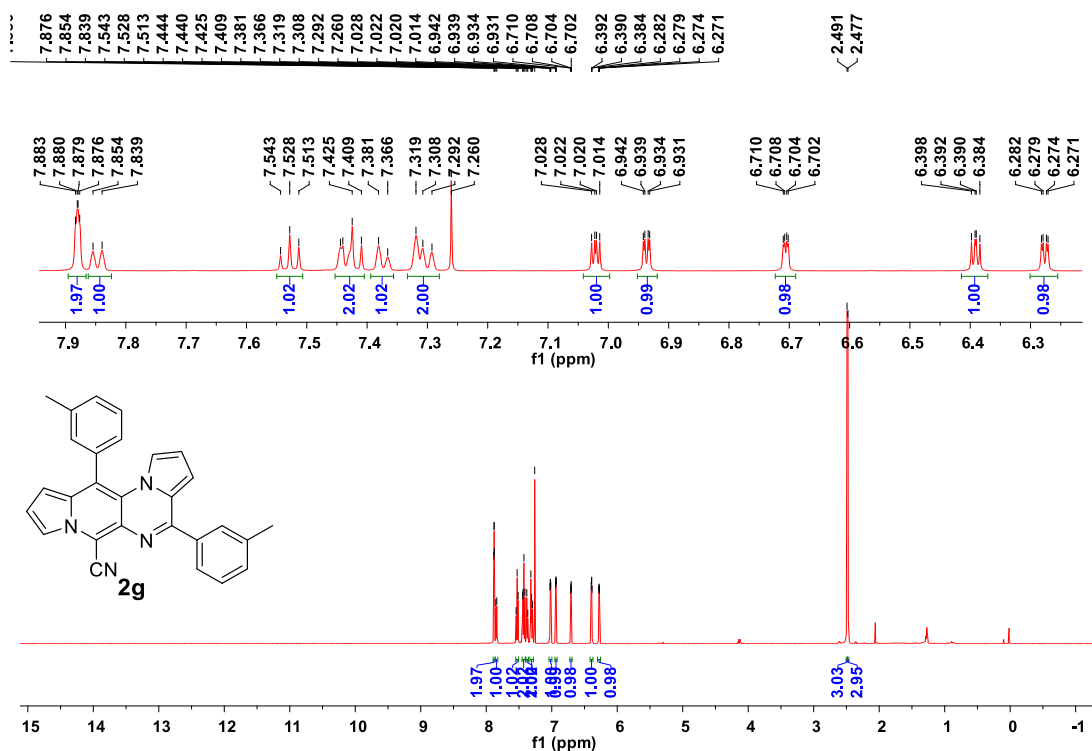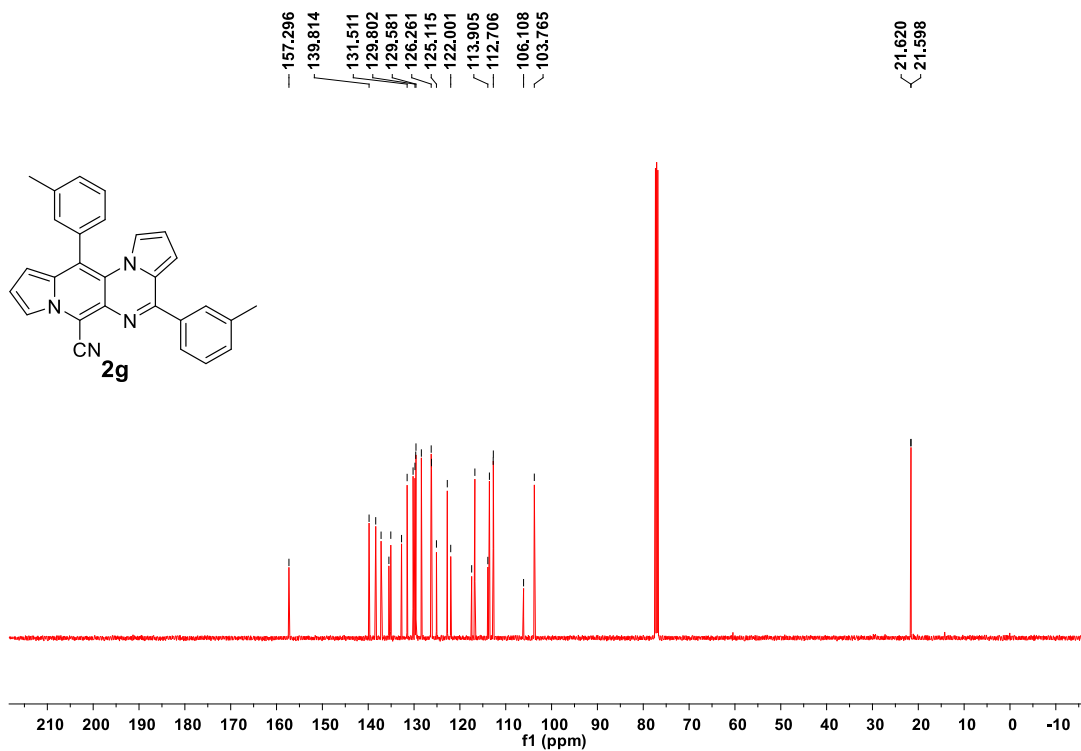

**4,11-Di(thiophen-2-yl)pyrrolo[1',2':4,5]pyrazino[2,3-f]indolizine-6-carbonitrile (2i)**

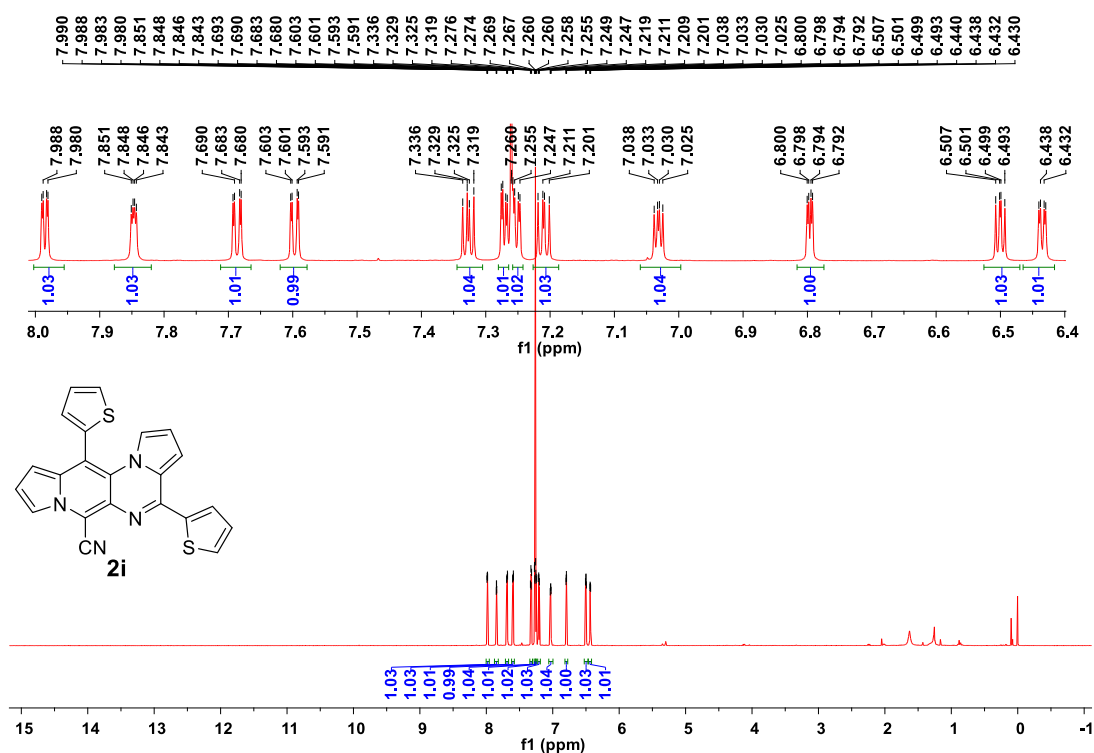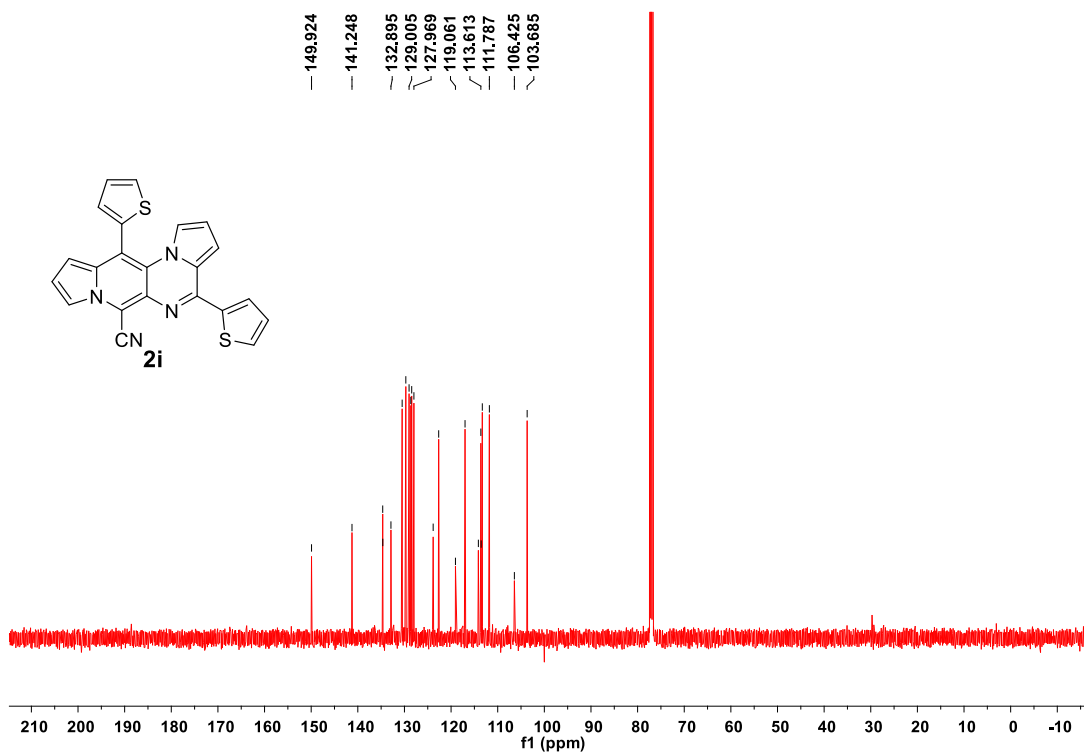

4,11-Dimethylpyrrolo[1',2':4,5]pyrazino[2,3-f]indolizine-6-carbonitrile (2j)

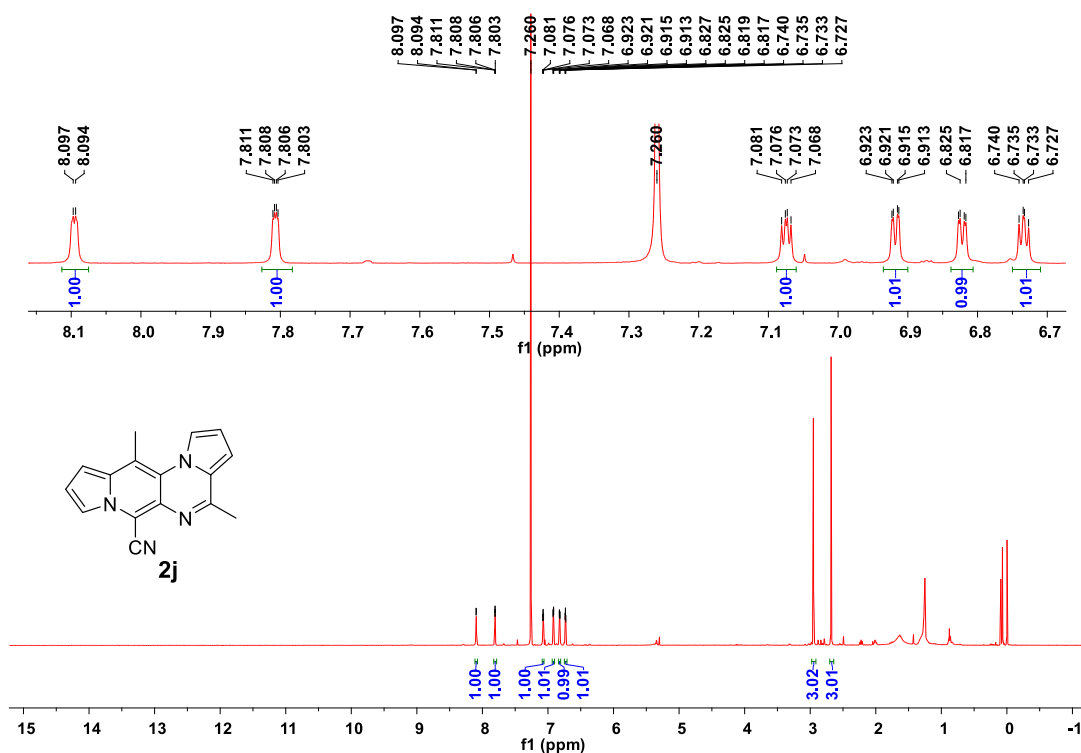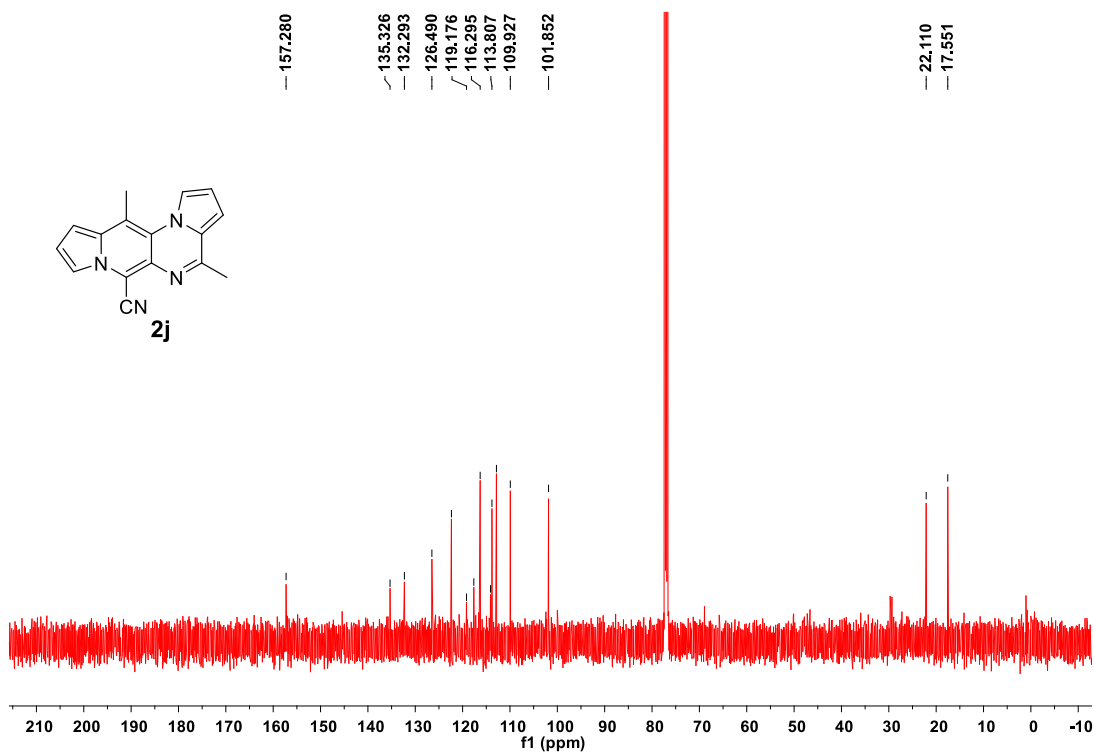

4,11-Diphenylimidazo[1',2':1,6]pyrido[3,4-e]imidazo[1,2-a]pyrazine-6-carbonitrile (3a)

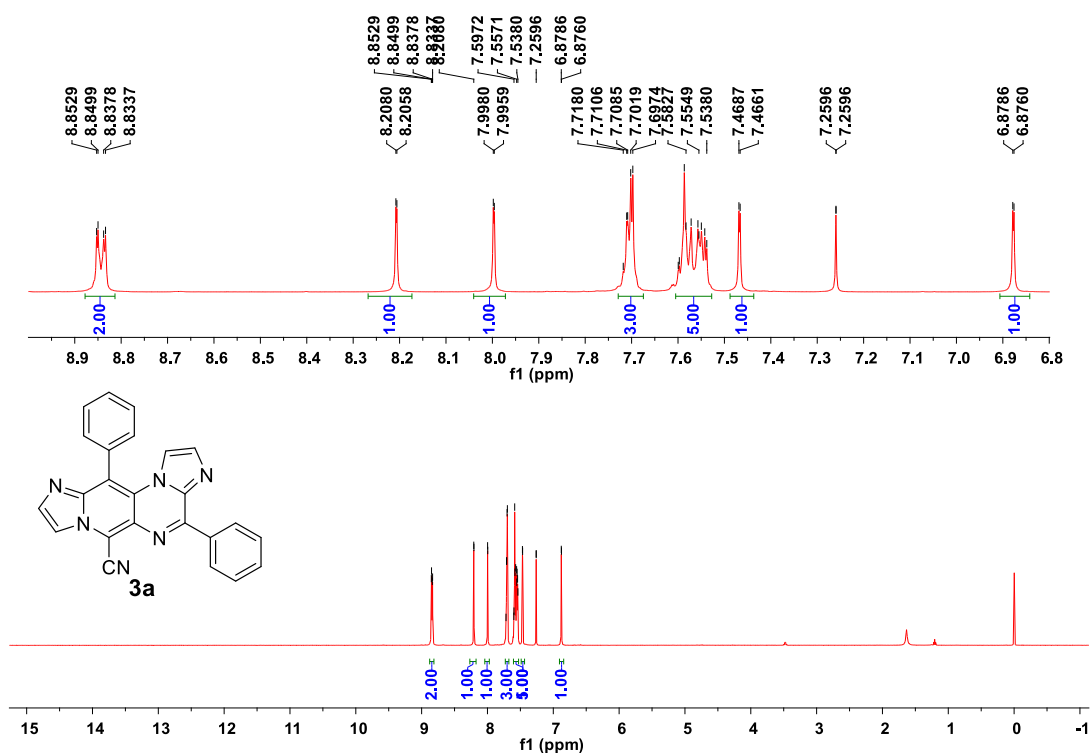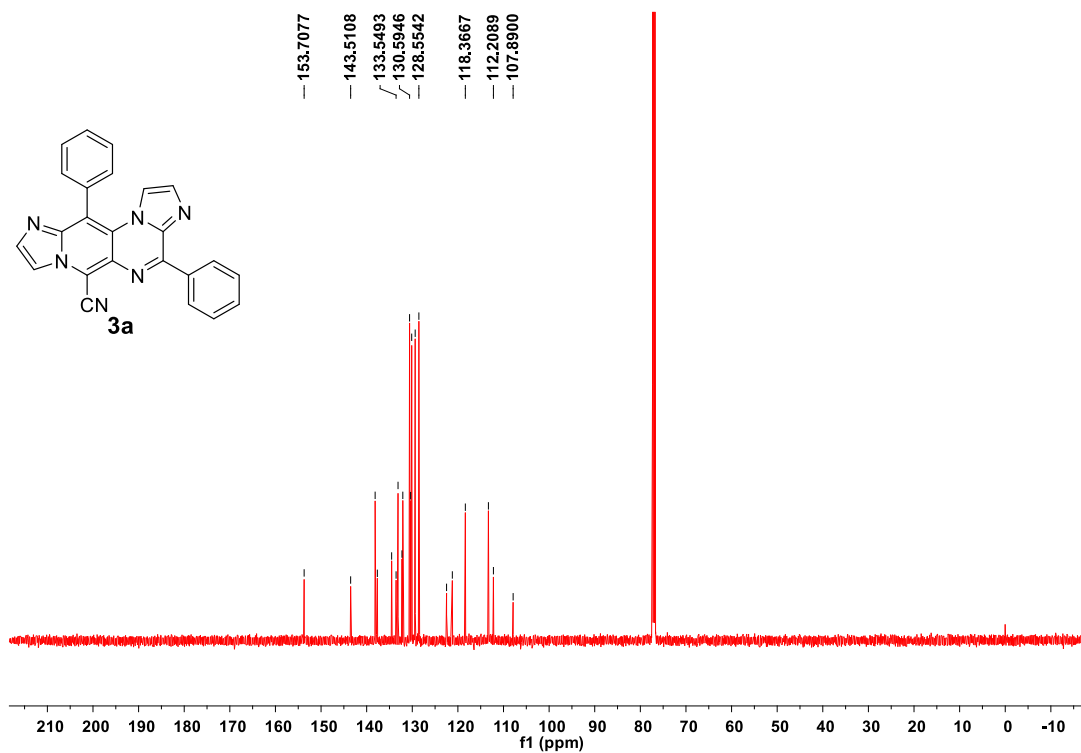

4,11-Bis(4-fluorophenyl)imidazo[1',2':1,6]pyrido[3,4-e]imidazo[1,2-a]pyrazine-6-carbonitrile

(3b)

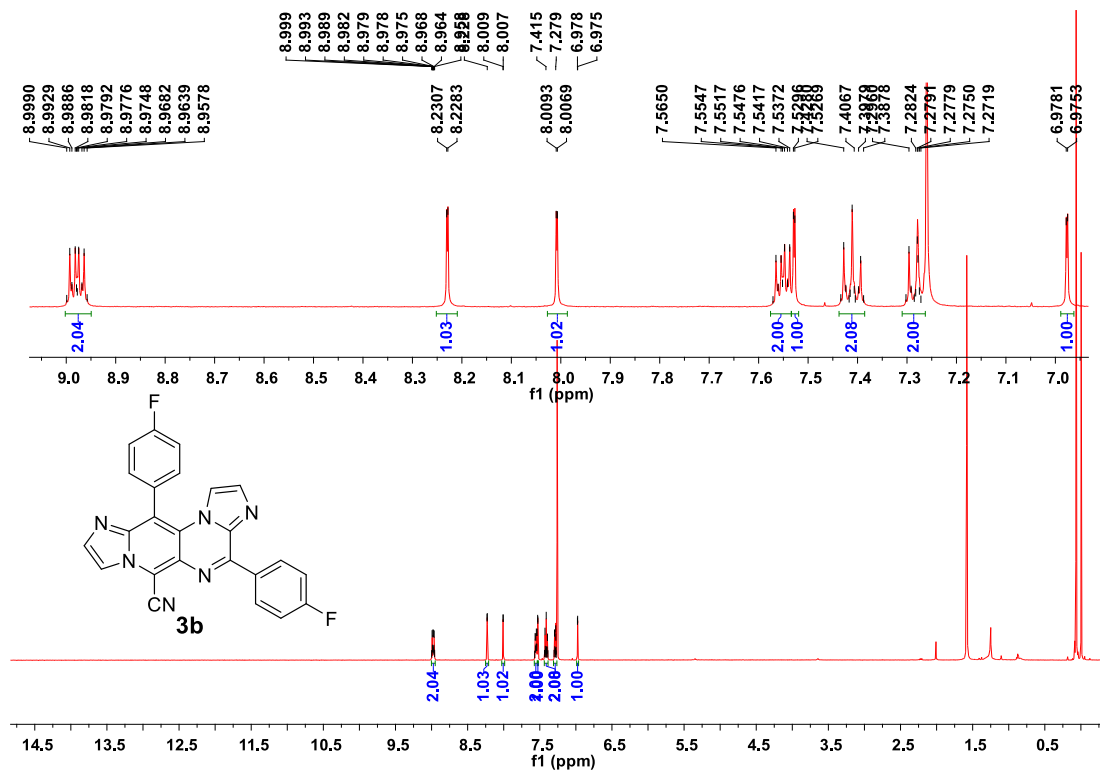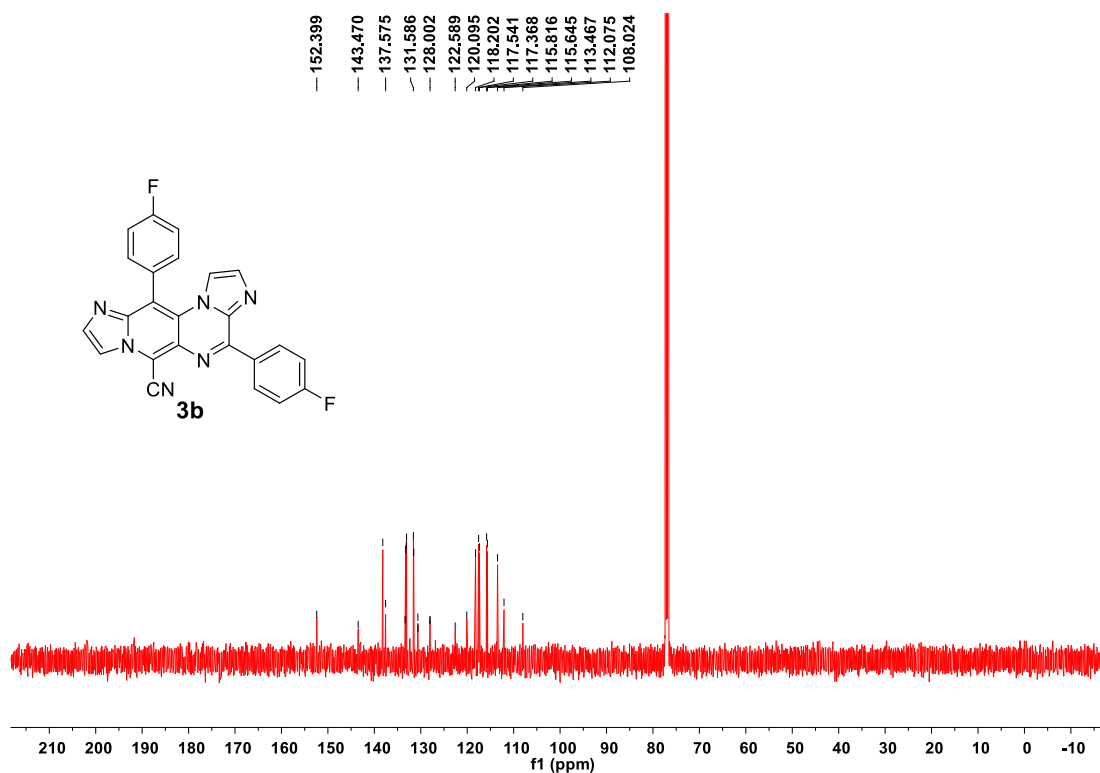

**4,11-Bis(4-chlorophenyl)imidazo[1',2':1,6]pyrido[3,4-e]imidazo[1,2-a]pyrazine-6-carbonitrile**  
**(3c)**

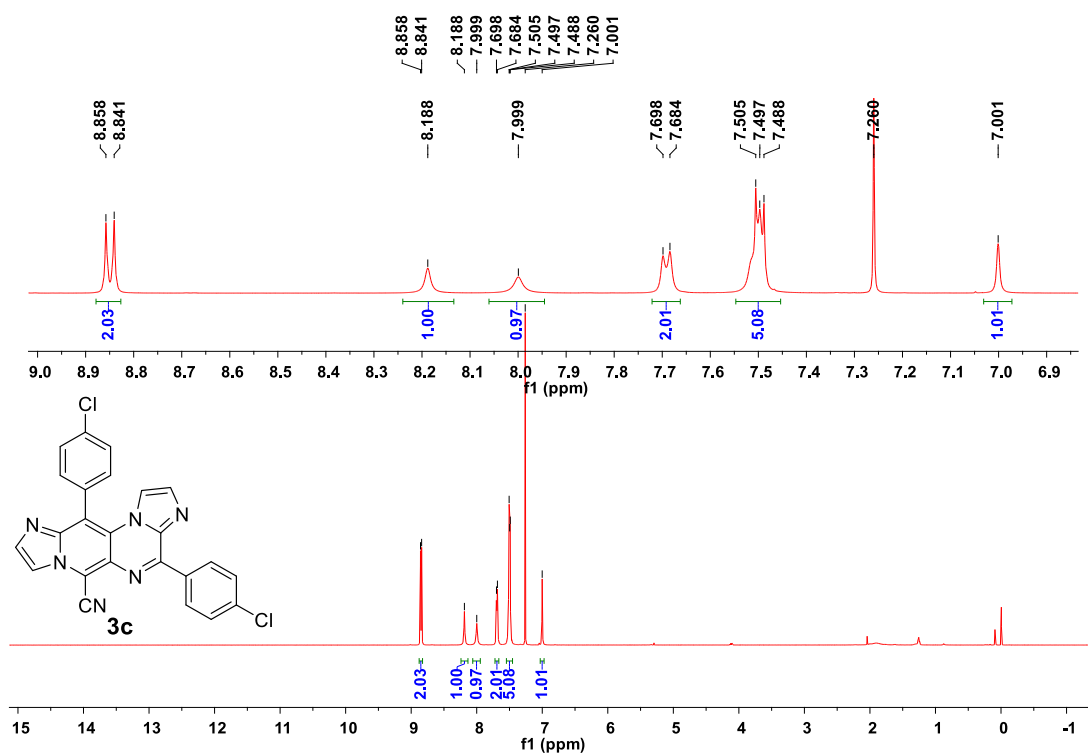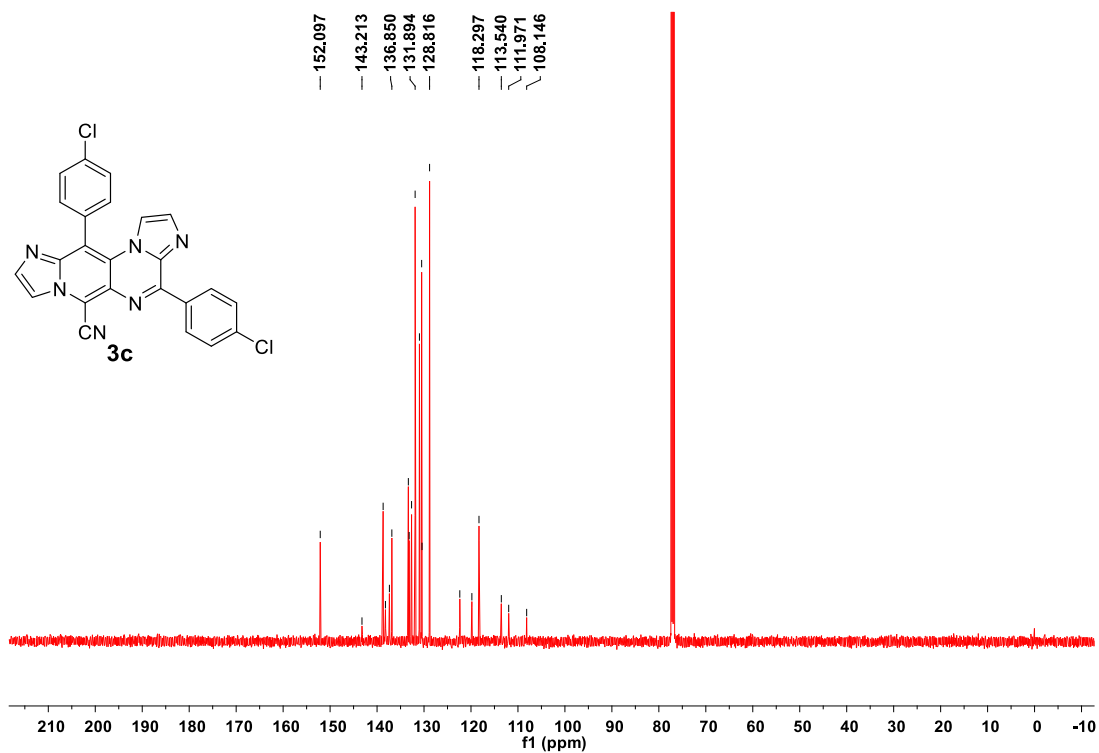

**4,11-Bis(4-bromophenyl)imidazo[1',2':1,6]pyrido[3,4-e]imidazo[1,2-a]pyrazine-6-carbonitrile (3d)**

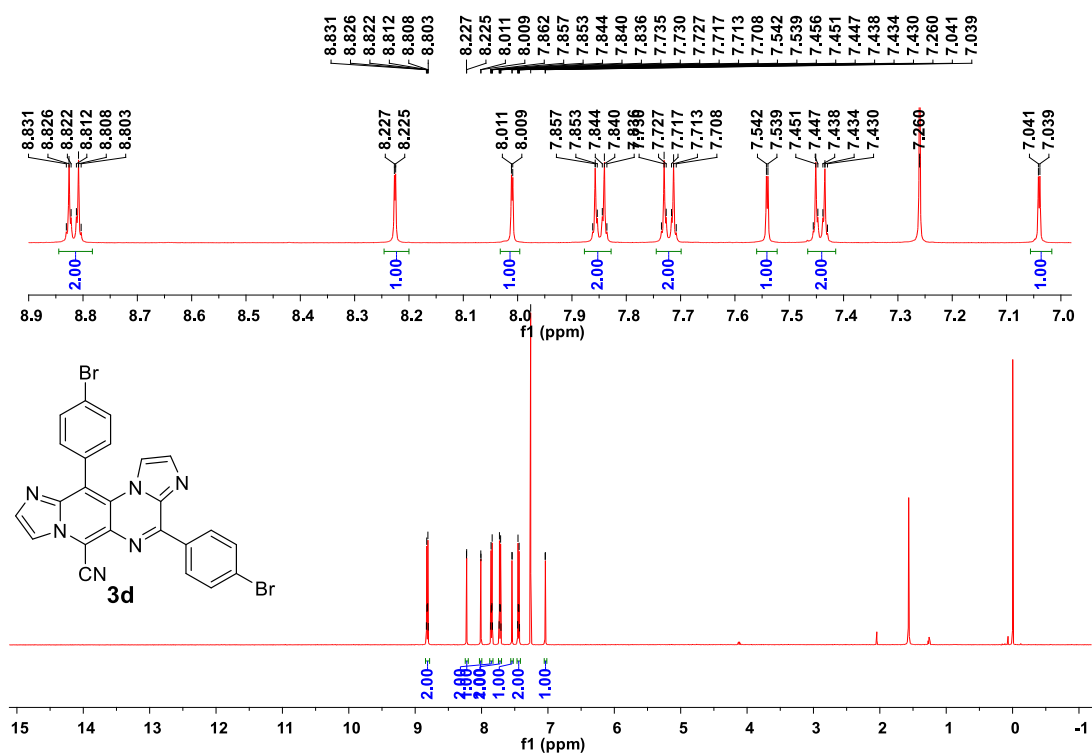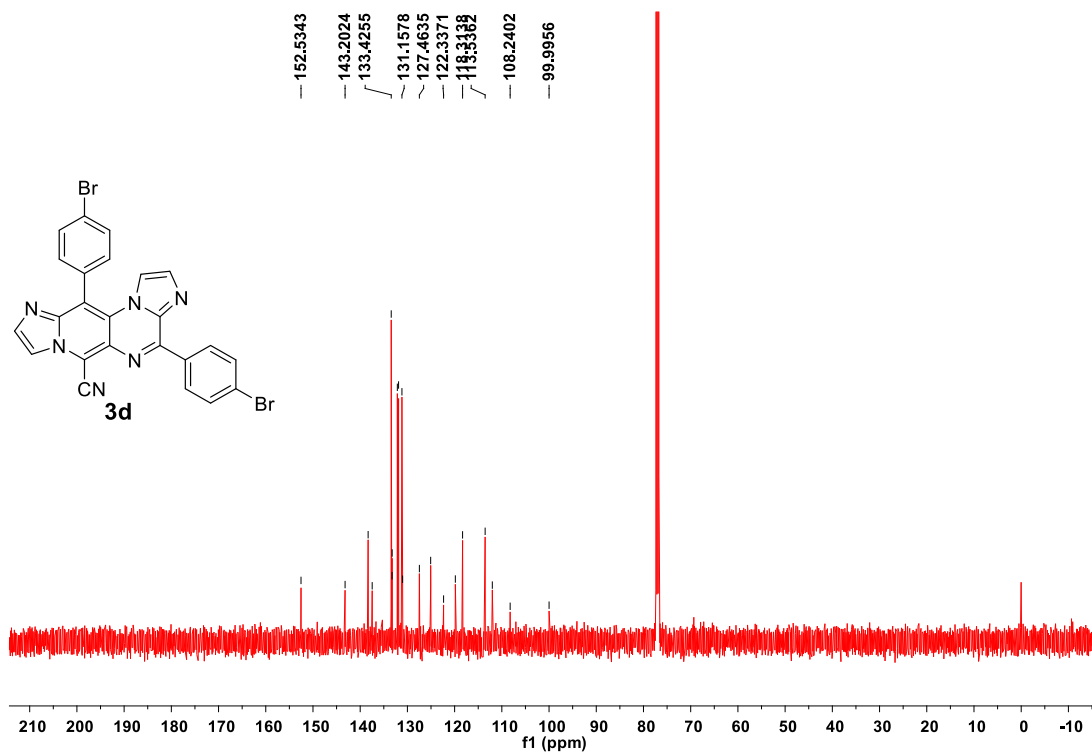

**4,11-Bis(4-(trifluoromethyl)phenyl)imidazo[1',2':1,6]pyrido[3,4-e]imidazo[1,2-a]pyrazine-6-carbonitrile (3e)**

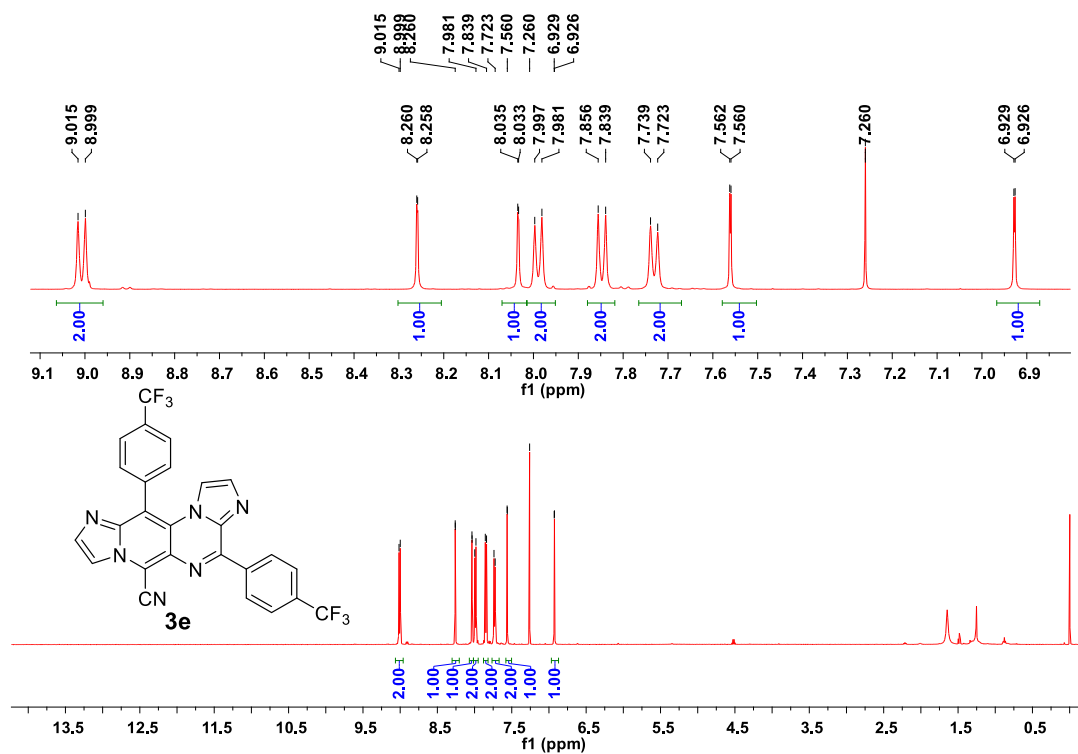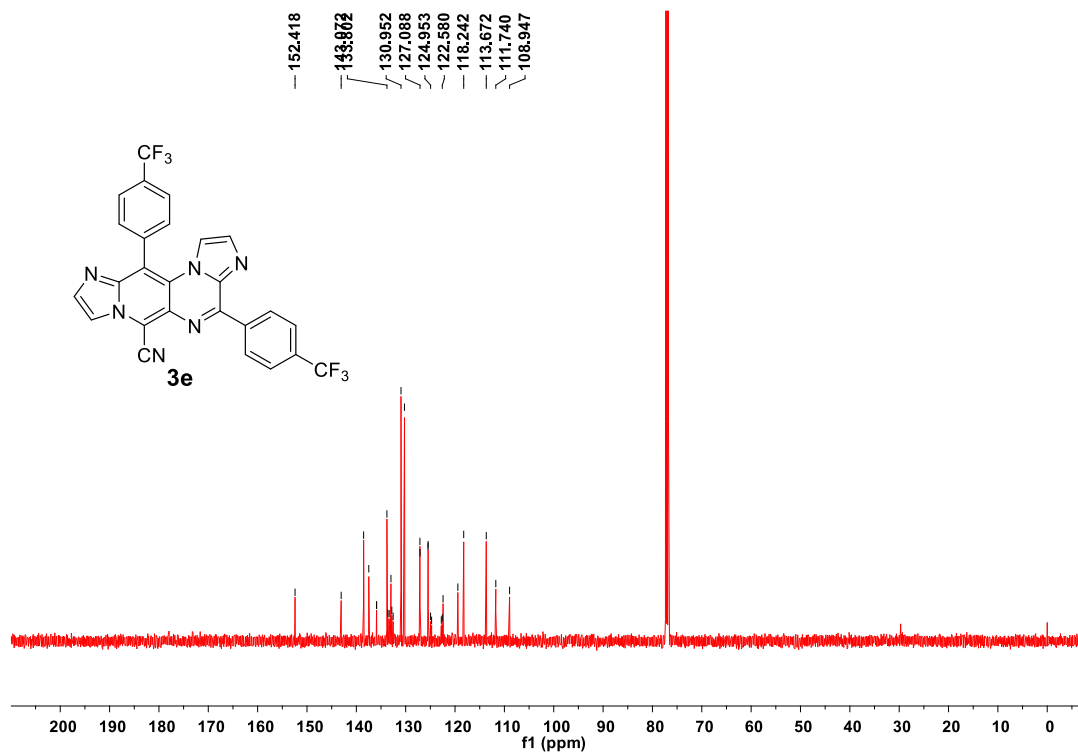

**Chemical structure of 3f:** Cc1ccc(cc1)-c2nc3c(ncn3c2C#N)-c4ccc(C)cc4

**<sup>1</sup>H NMR spectrum (CDCl<sub>3</sub>):**

- Aromatic region (6.9–9.9 ppm):**
  - 8.774, 8.757 (d, 2H, integration 2.00)
  - 8.170, 8.168 (d, 2H, integration 1.00)
  - 7.965, 7.962 (d, 2H, integration 1.00)
  - 7.424, 7.367, 7.351 (m, 2H, integration 2.00)
  - 7.408, 7.457, 7.459, 7.502 (m, 2H, integration 1.00)
  - 7.260, 7.2541, 7.2460 (m, 2H, integration 2.00)
  - 6.985, 6.982 (d, 2H, integration 0.97)
- Aliphatic region (0.5–3.0 ppm):**
  - 2.541, 2.460 (s, 3H, integration 3.00)
  - 0.985, 0.982 (d, 3H, integration 3.00)

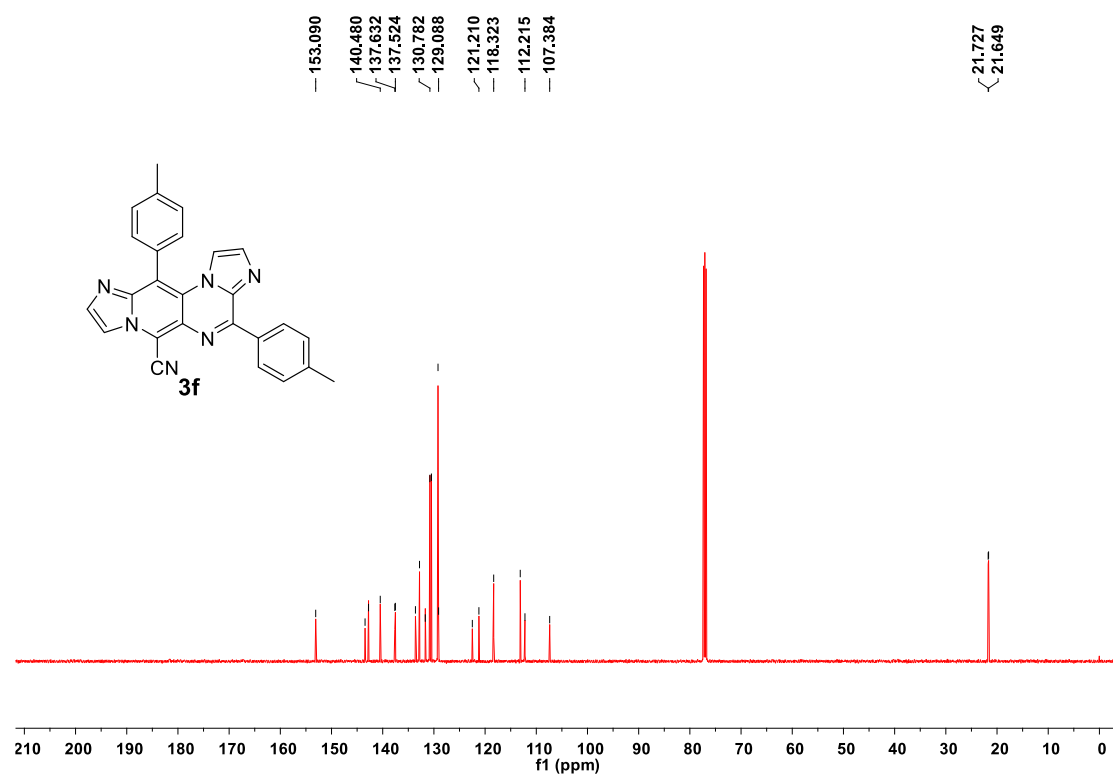

**4,11-Bis(4-methoxyphenyl)imidazo[1',2':1,6]pyrido[3,4-e]imidazo[1,2-a]pyrazine-6-carbonitrile (3g)**

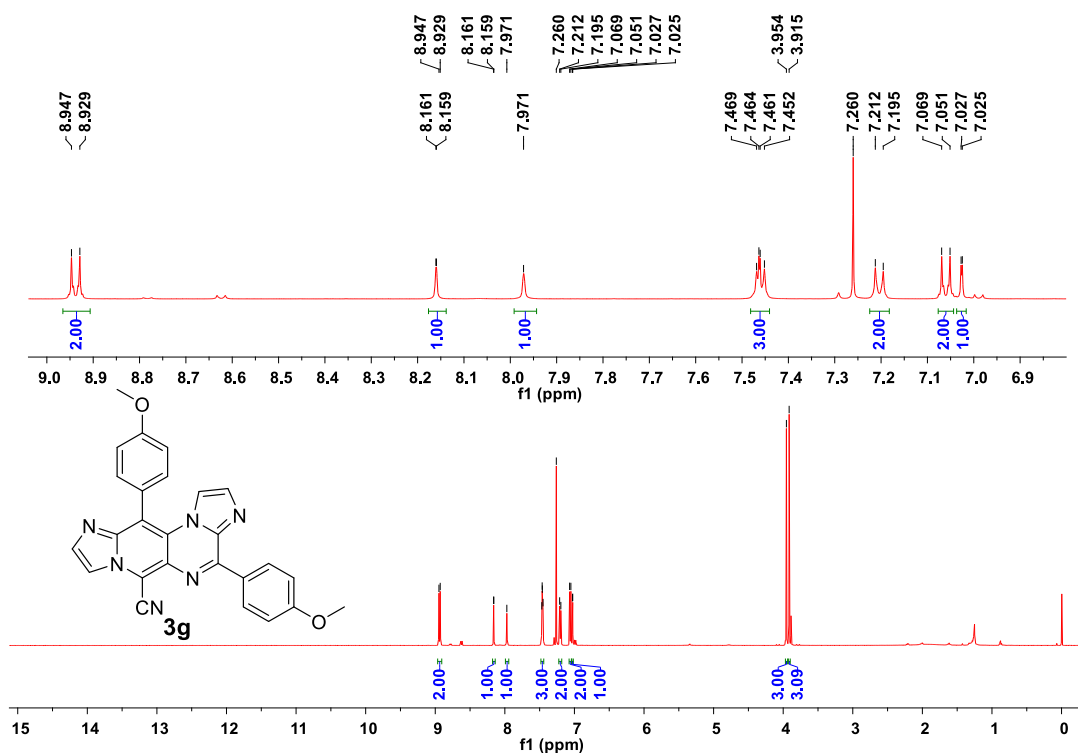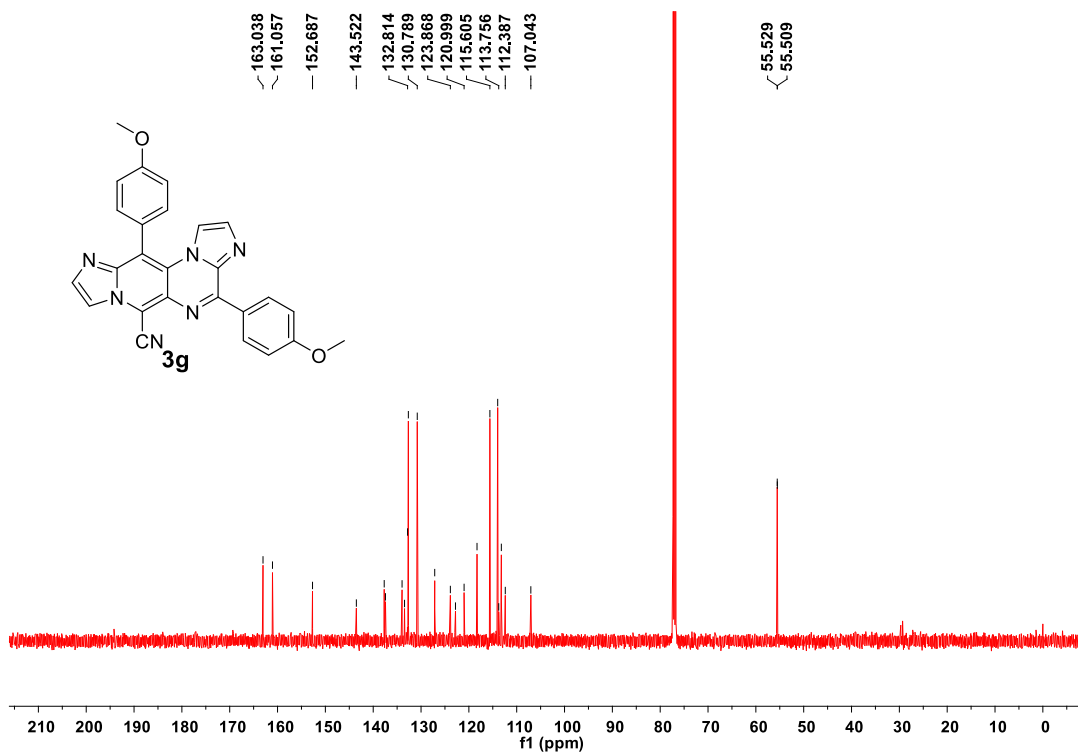

**4,11-Bis(4-(tert-butyl)phenyl)imidazo[1',2':1,6]pyrido[3,4-e]imidazo[1,2-a]pyrazine-6-carbonitrile (3h)**

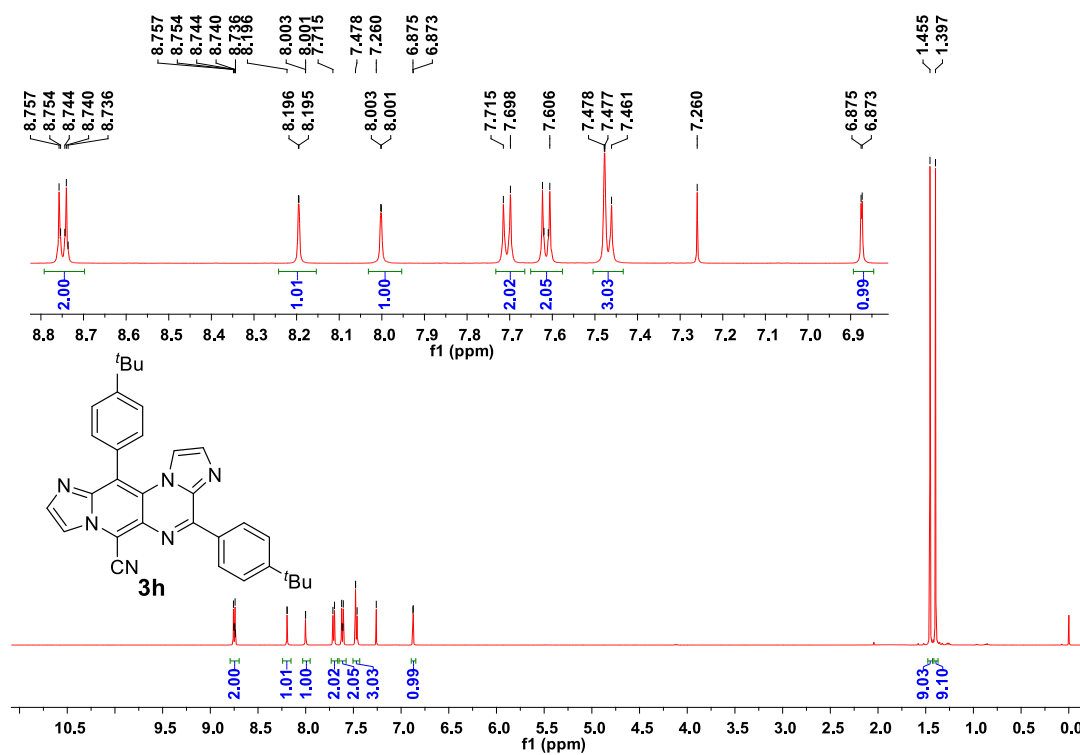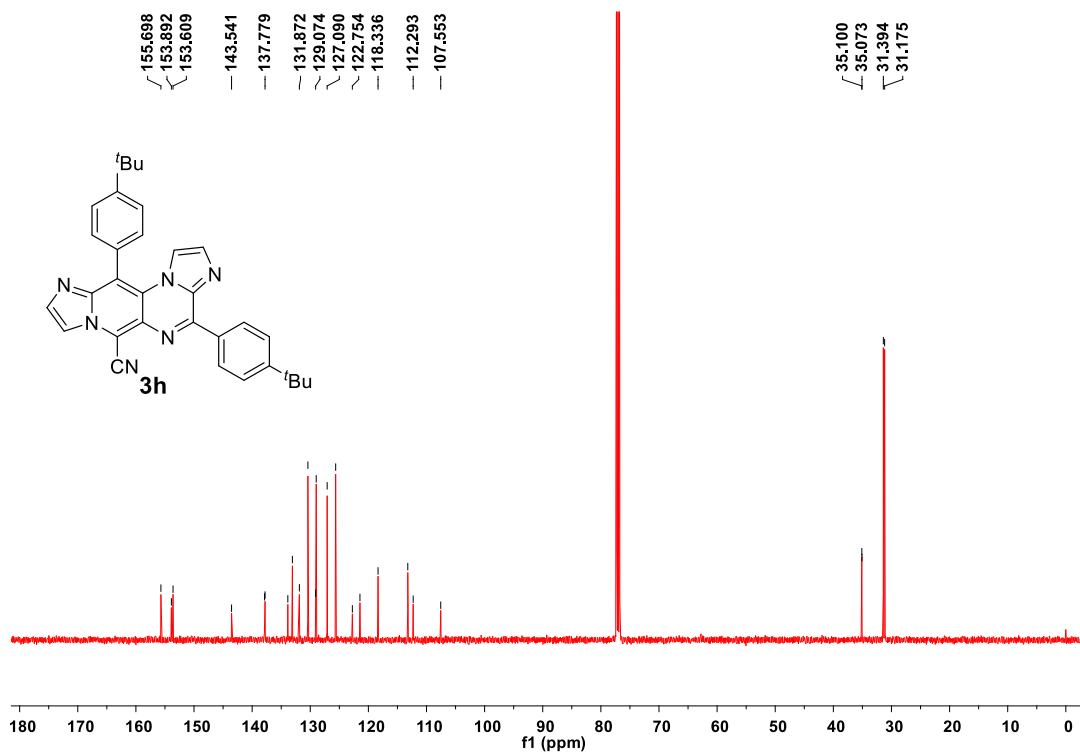

4,11-Di-m-tolylimidazo[1',2':1,6]pyrido[3,4-e]imidazo[1,2-a]pyrazine-6-carbonitrile (3i)

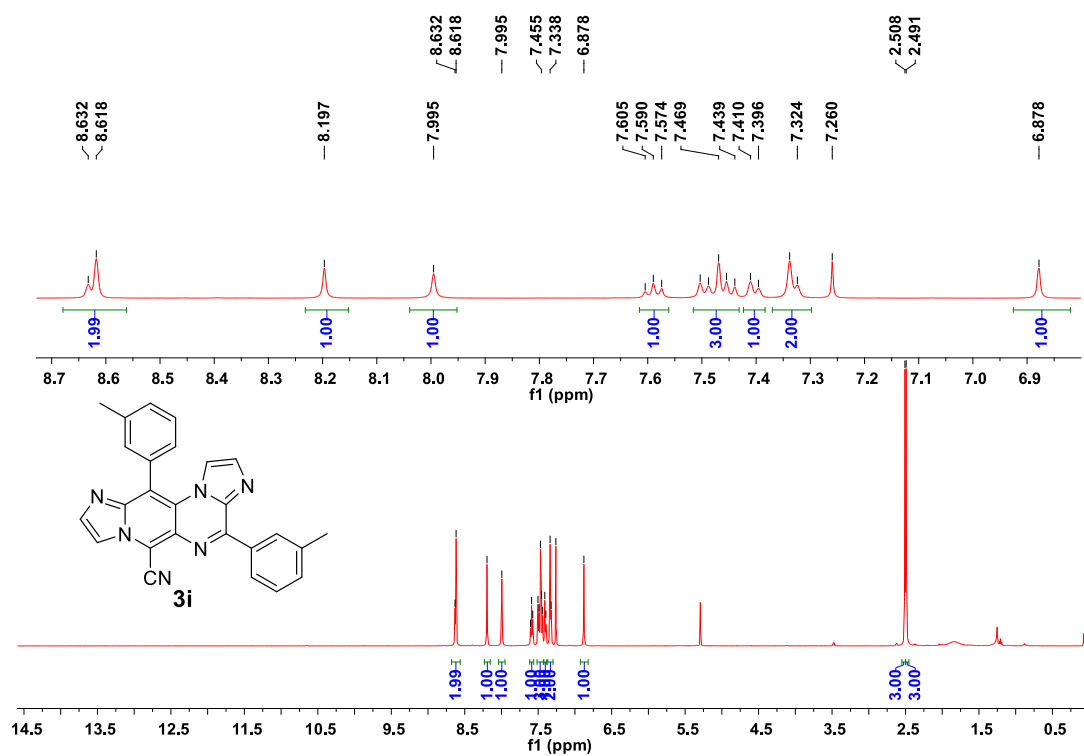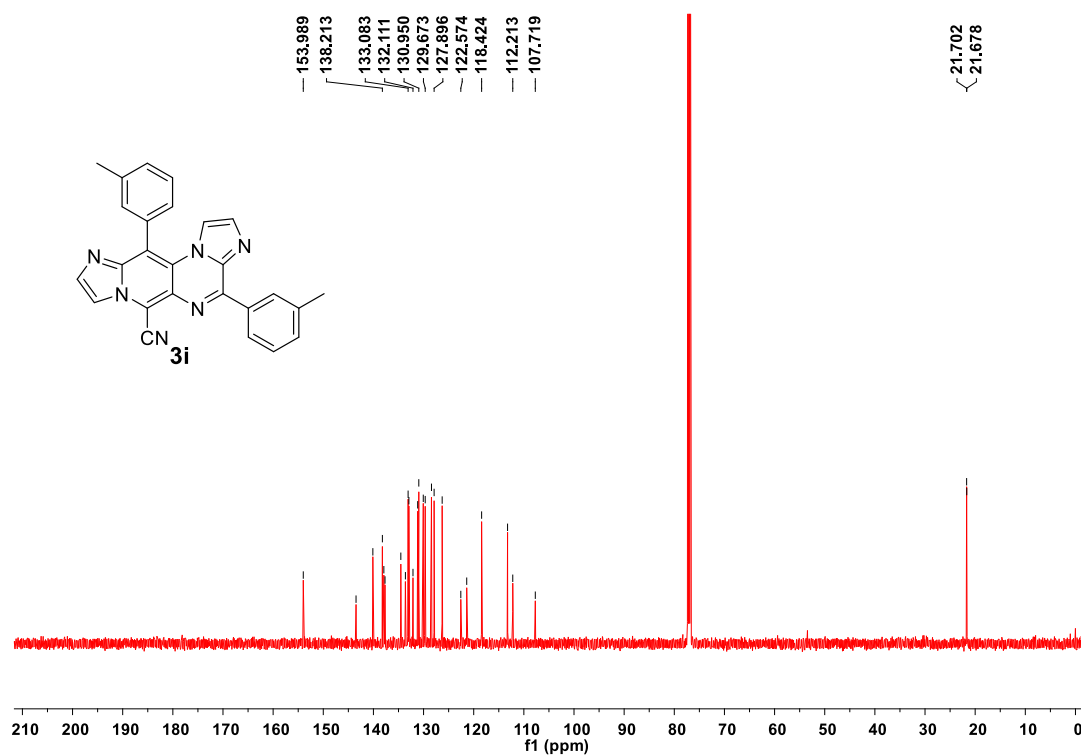

4,11-Bis(2-chlorophenyl)imidazo[1',2':1,6]pyrido[3,4-e]imidazo[1,2-a]pyrazine-6-carbonitrile  
(3k)

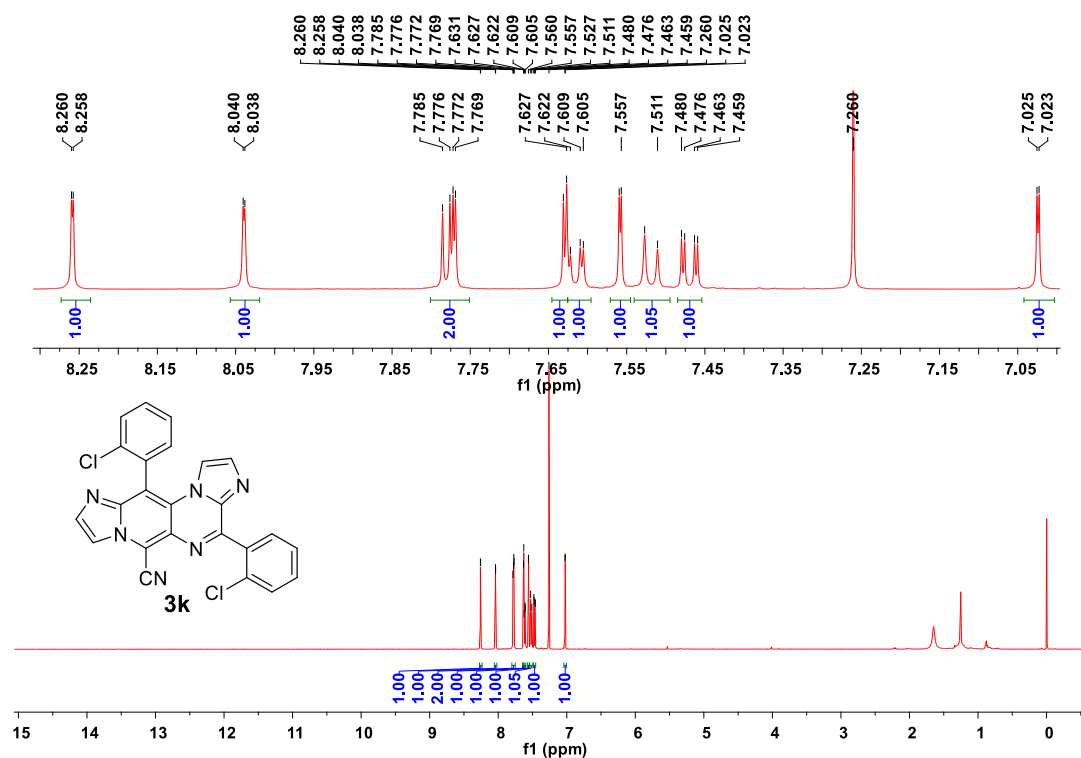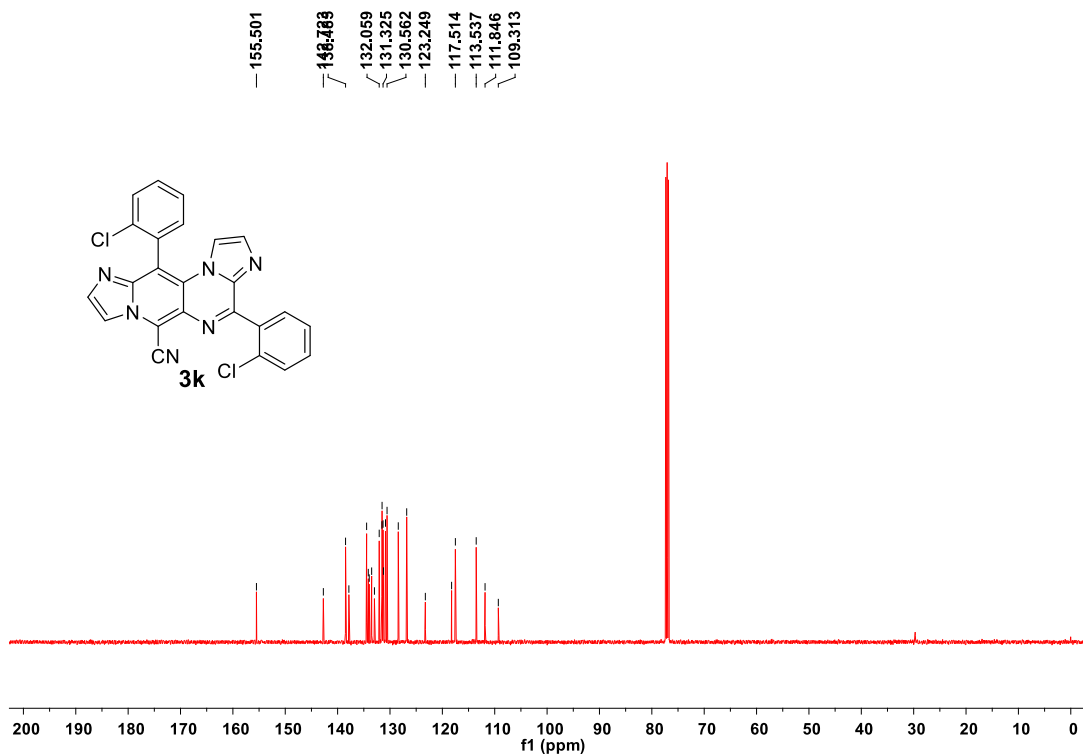

**4,11-Bis(2,4-dichlorophenyl)imidazo[1',2':1,6]pyrido[3,4-e]imidazo[1,2-a]pyrazine-6-carbonitrile (3I)**

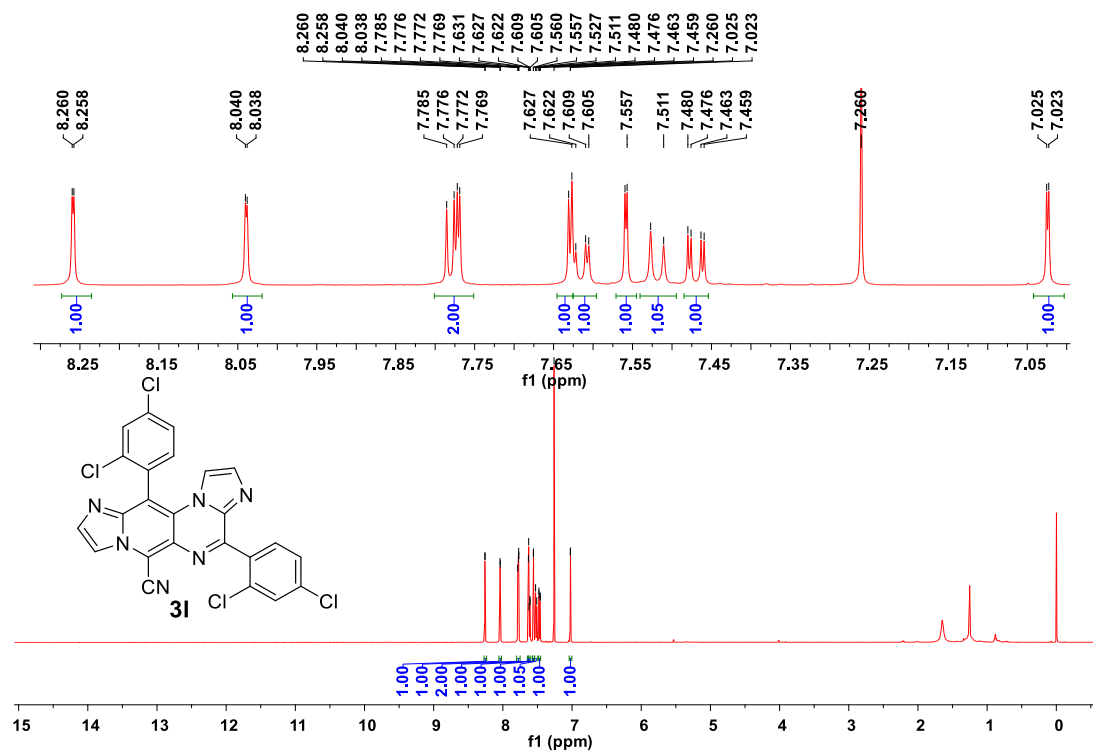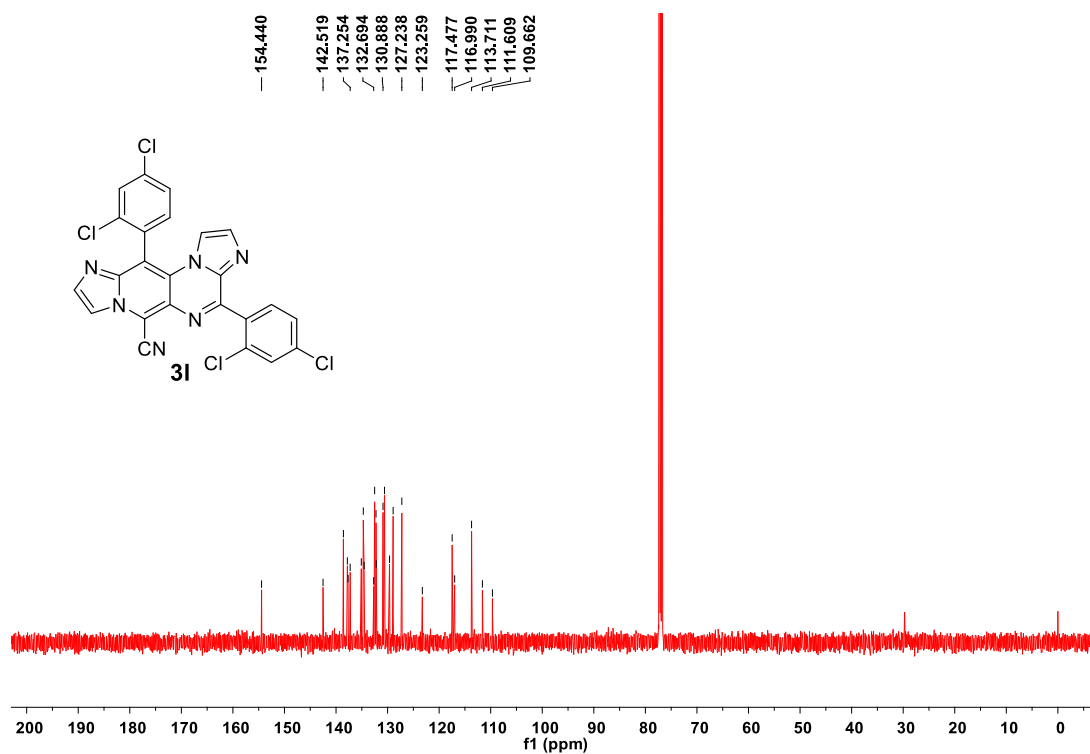

**4,11-Di(thiophen-2-yl)imidazo[1',2':1,6]pyrido[3,4-e]imidazo[1,2-a]pyrazine-6-carbonitrile (3m)**

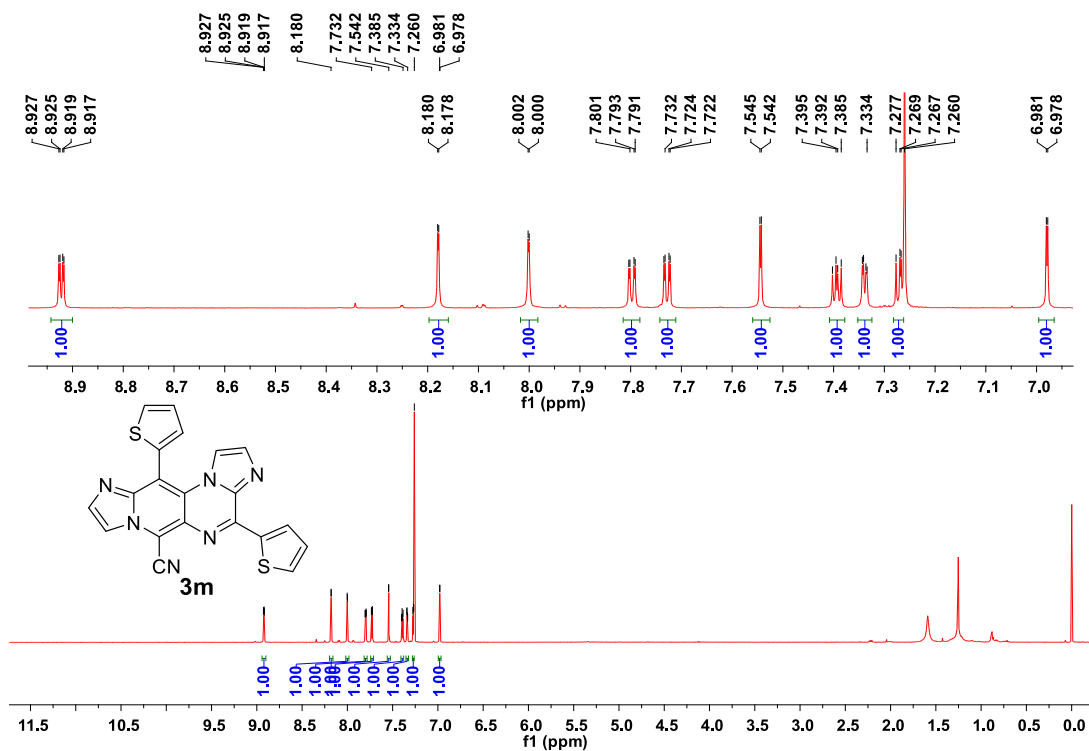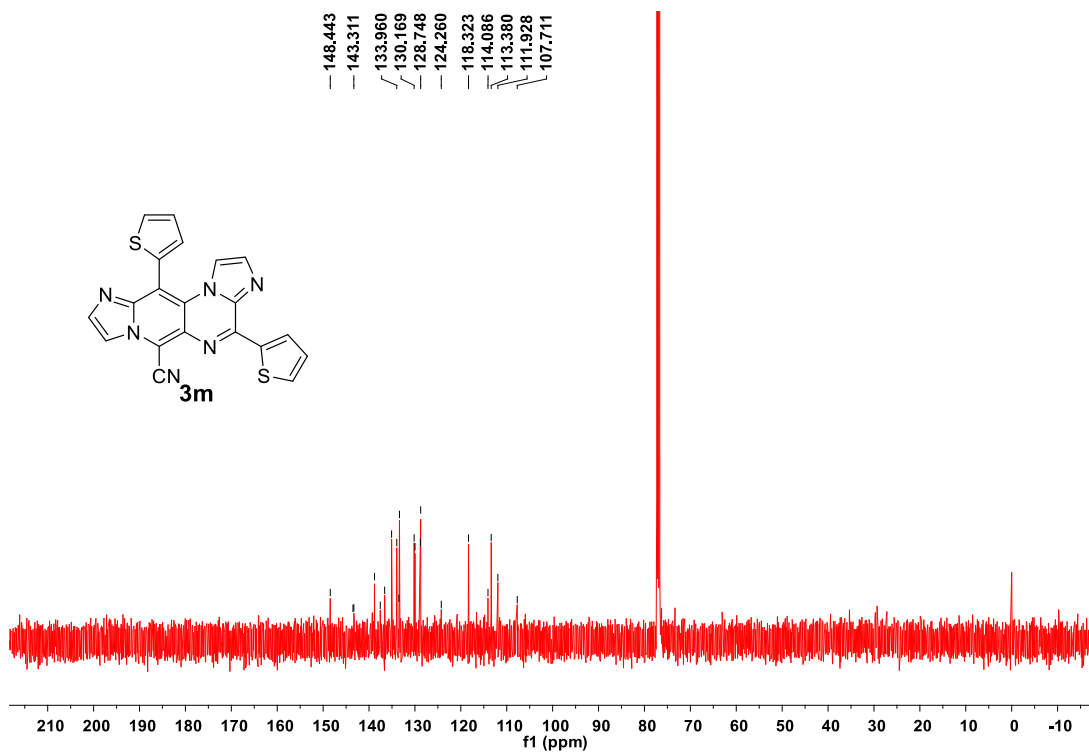

**6-Cyano-5-methyl-4,11-diphenylimidazo[1',2':1,6]pyrido[3,4-e]imidazo[1,2-a]pyrazin-5-ium iodide (4a)**

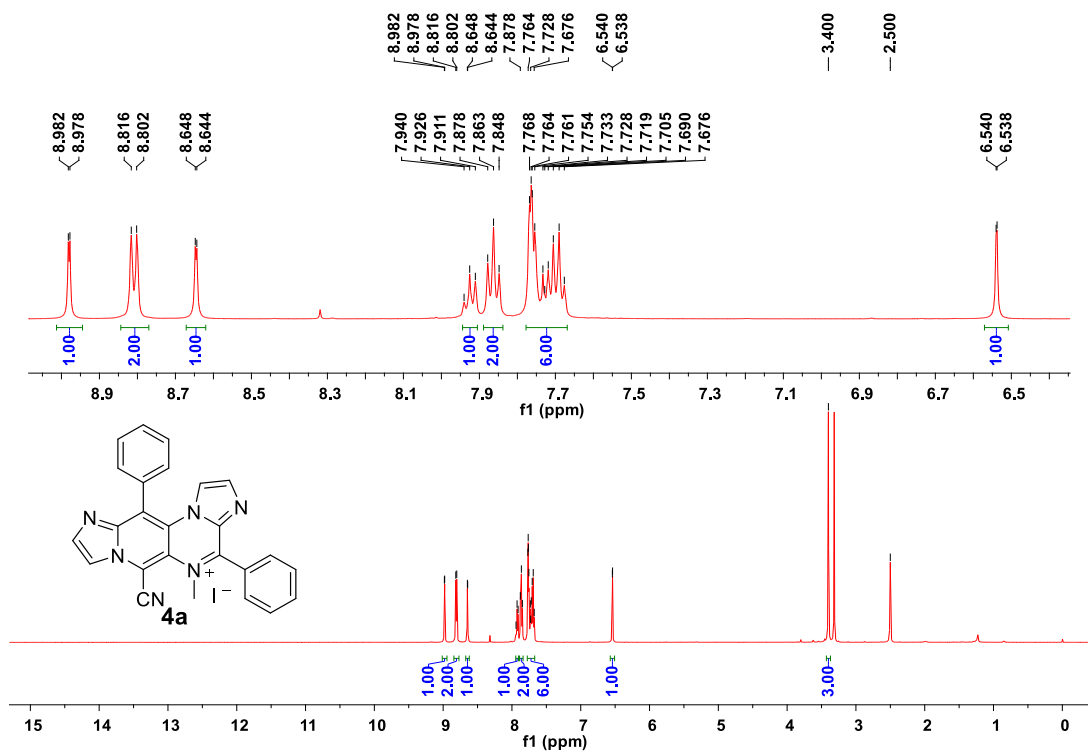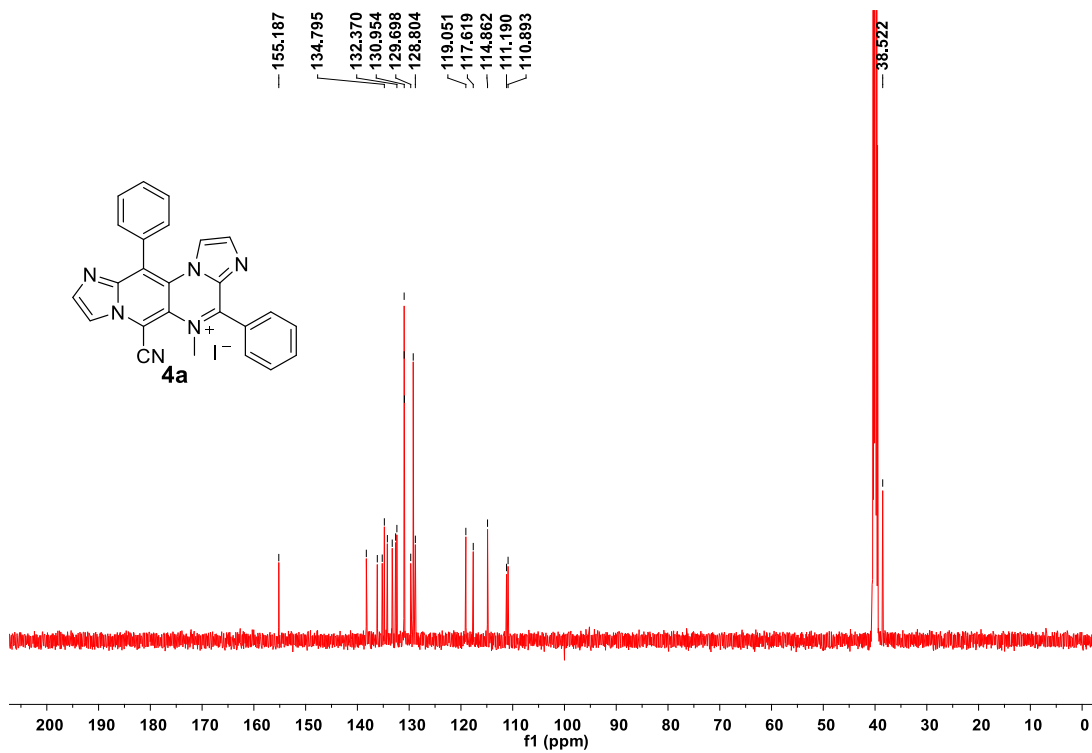

**6-Cyano-4,11-bis(4-fluorophenyl)-5-methylimidazo[1',2':1,6]pyrido[3,4-e]imidazo[1,2-a]pyrazin-5-ium iodide (4b)**

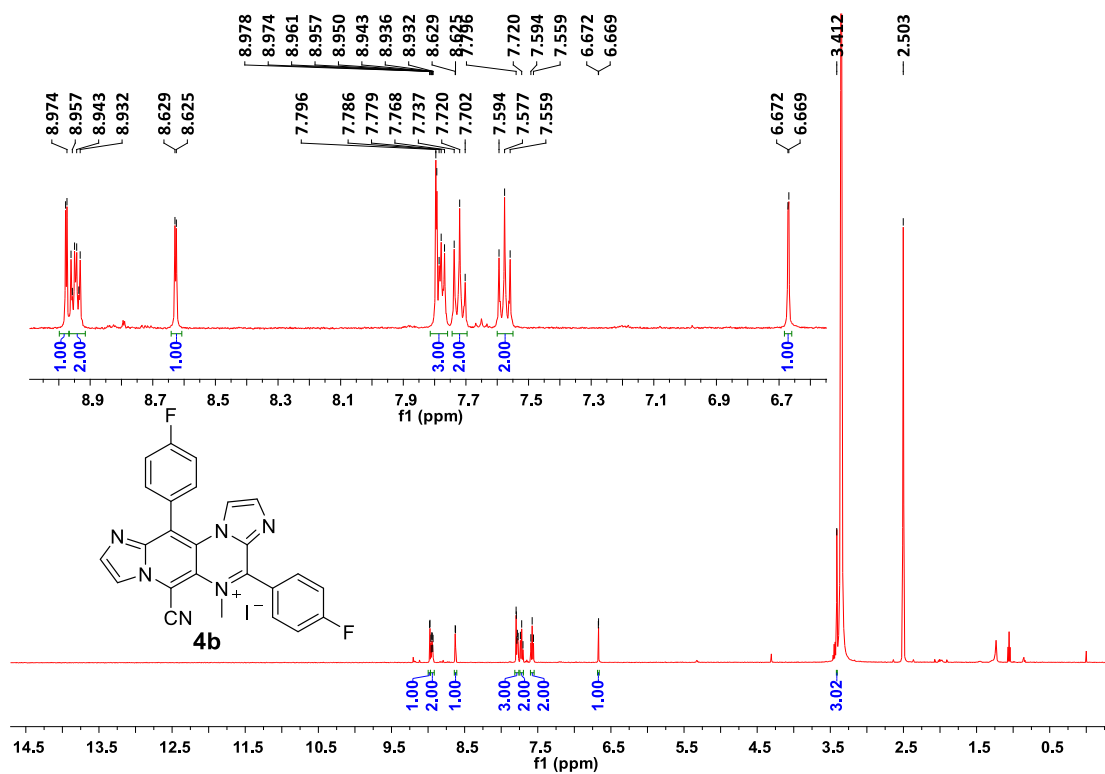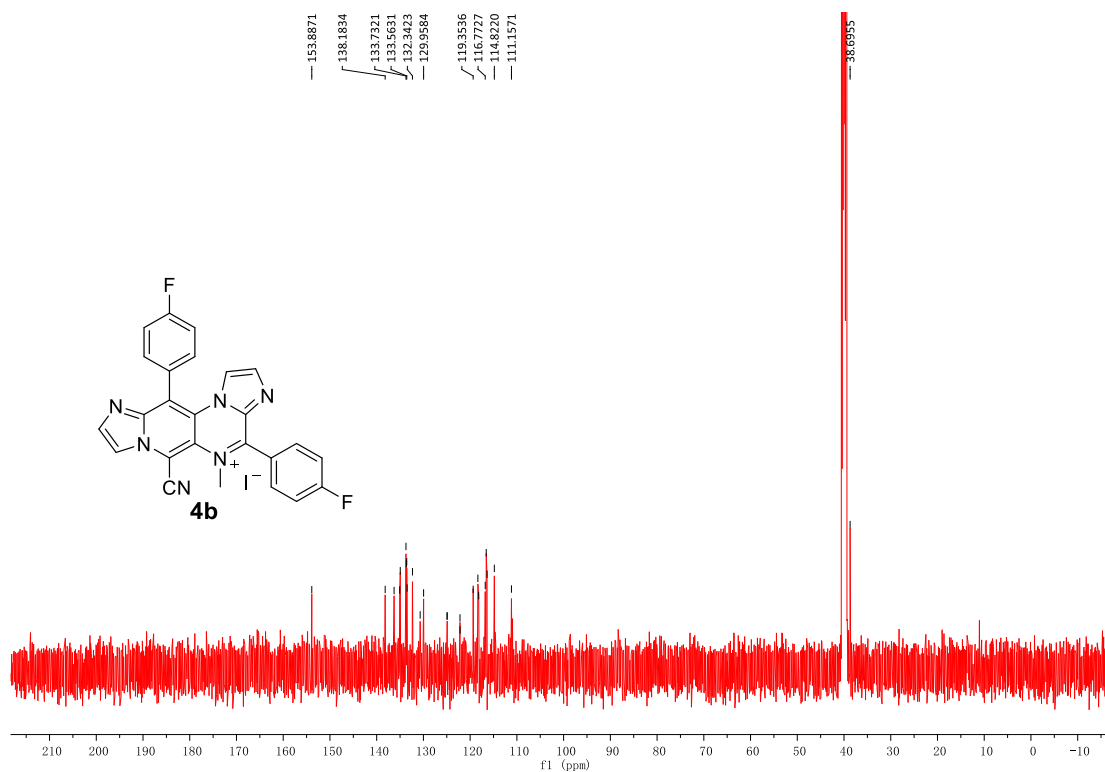

**4,11-Bis(4-chlorophenyl)-6-cyano-5-methylimidazo[1',2':1,6]pyrido[3,4-e]imidazo[1,2-a]pyrazin-5-ium iodide (4c)**

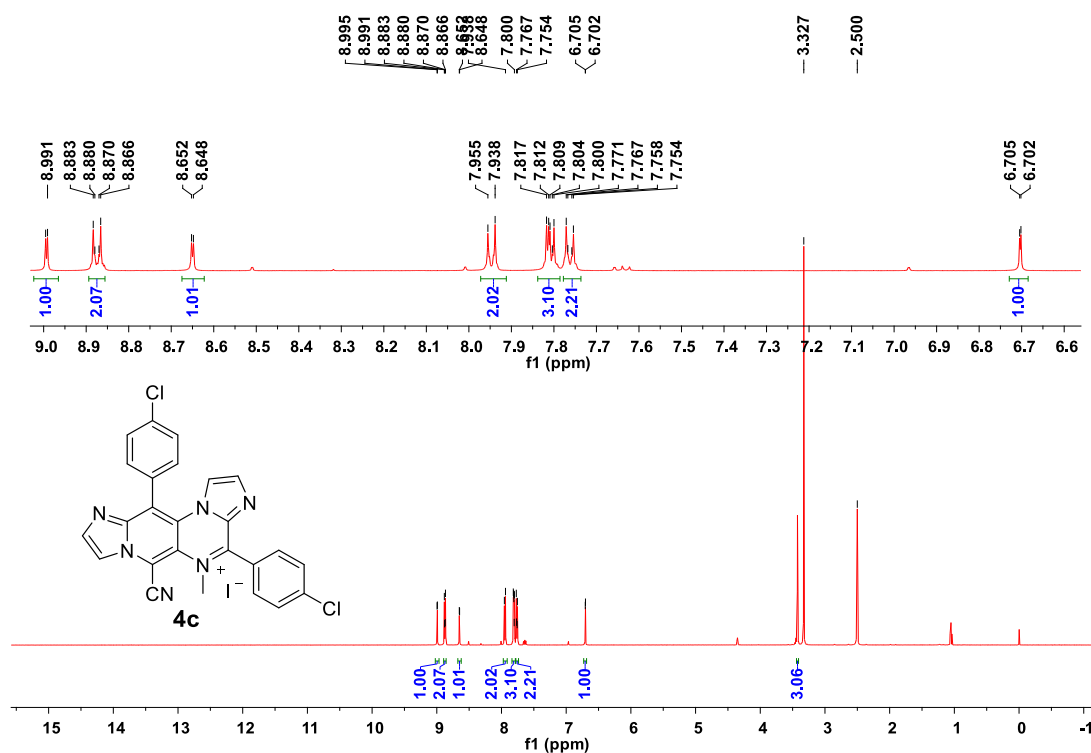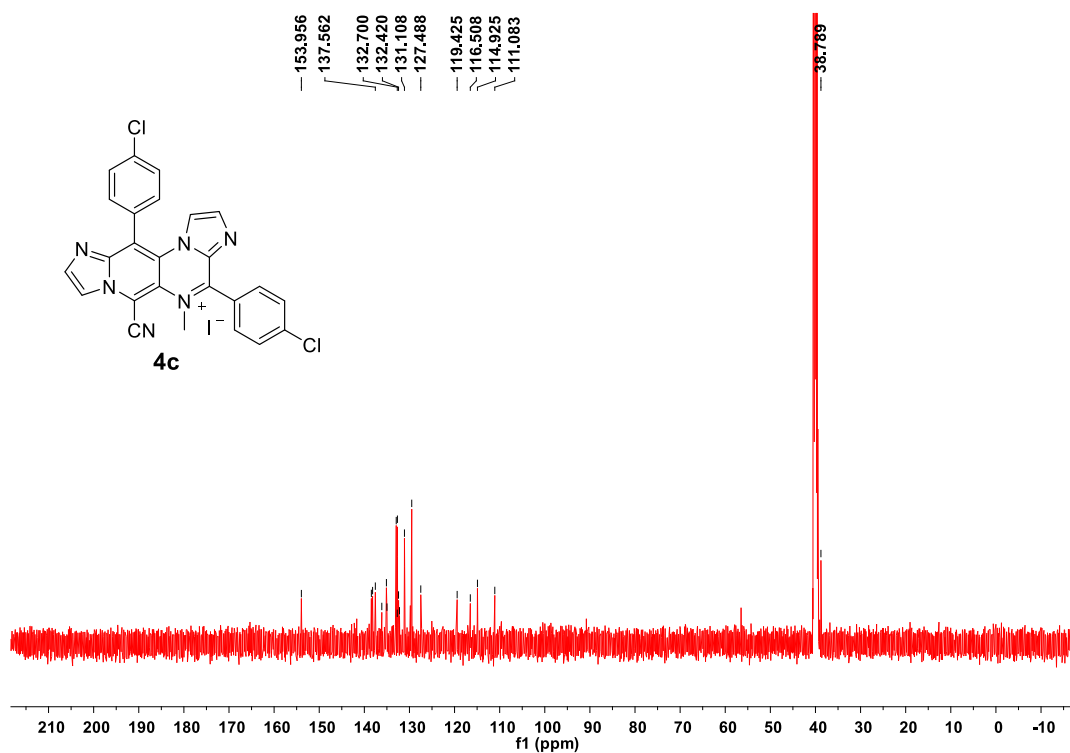

**4,11-Bis(4-bromophenyl)-6-cyano-5-methylimidazo[1',2':1,6]pyrido[3,4-e]imidazo[1,2-a]pyrazin-5-ium iodide (4d)**

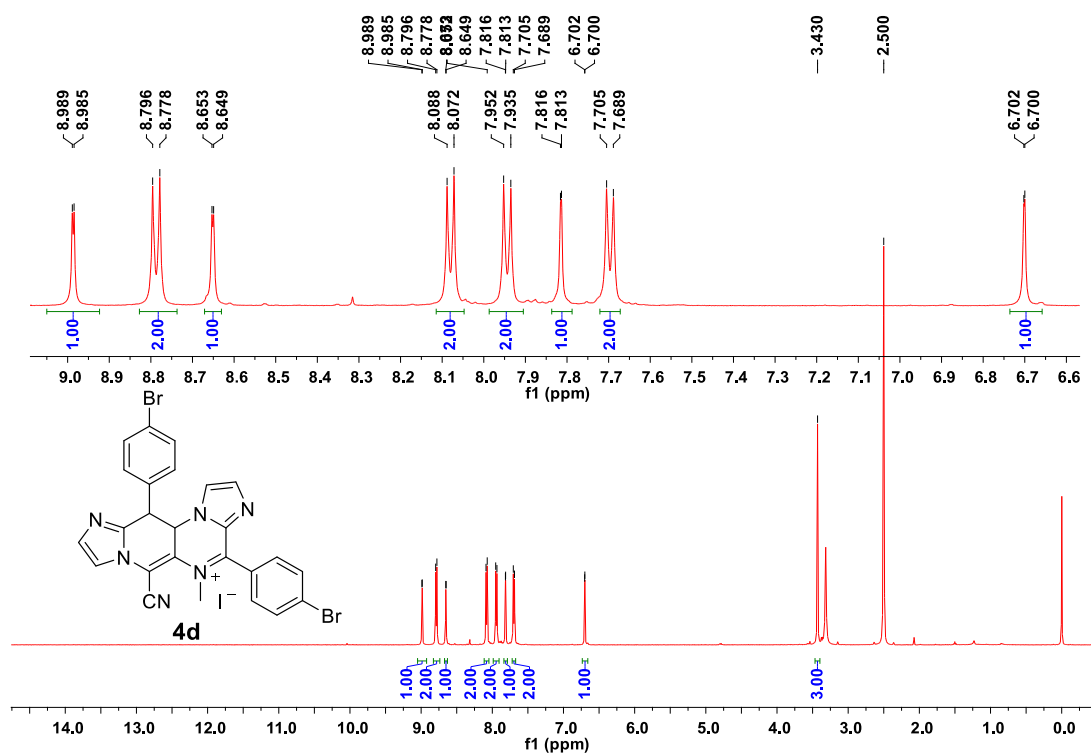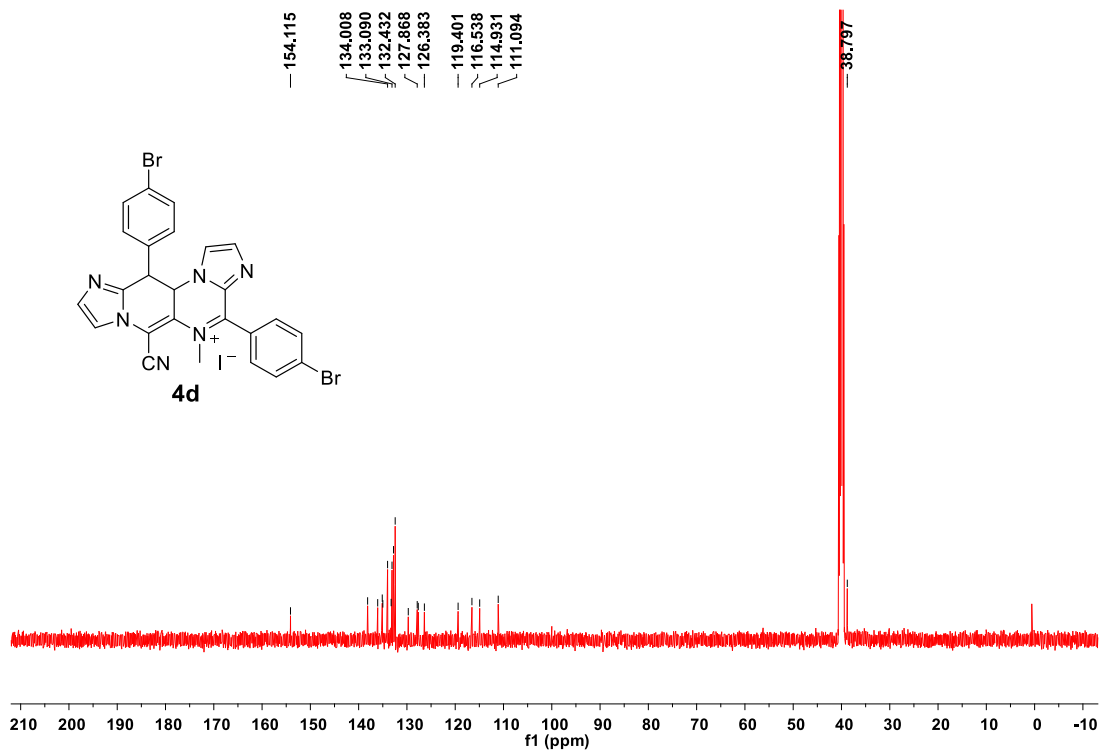

**6-Cyano-4,11-bis(4-methoxyphenyl)-5-methylimidazo[1',2':1,6]pyrido[3,4-e]imidazo[1,2-a]pyrazin-5-ium iodide (4e)**

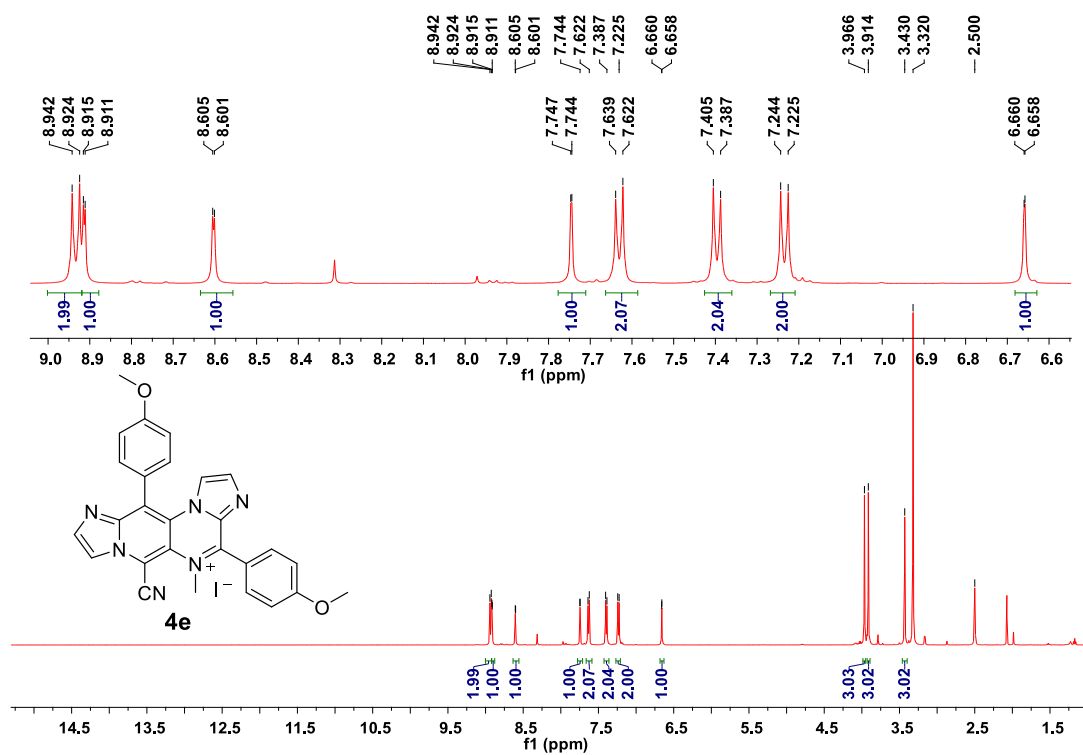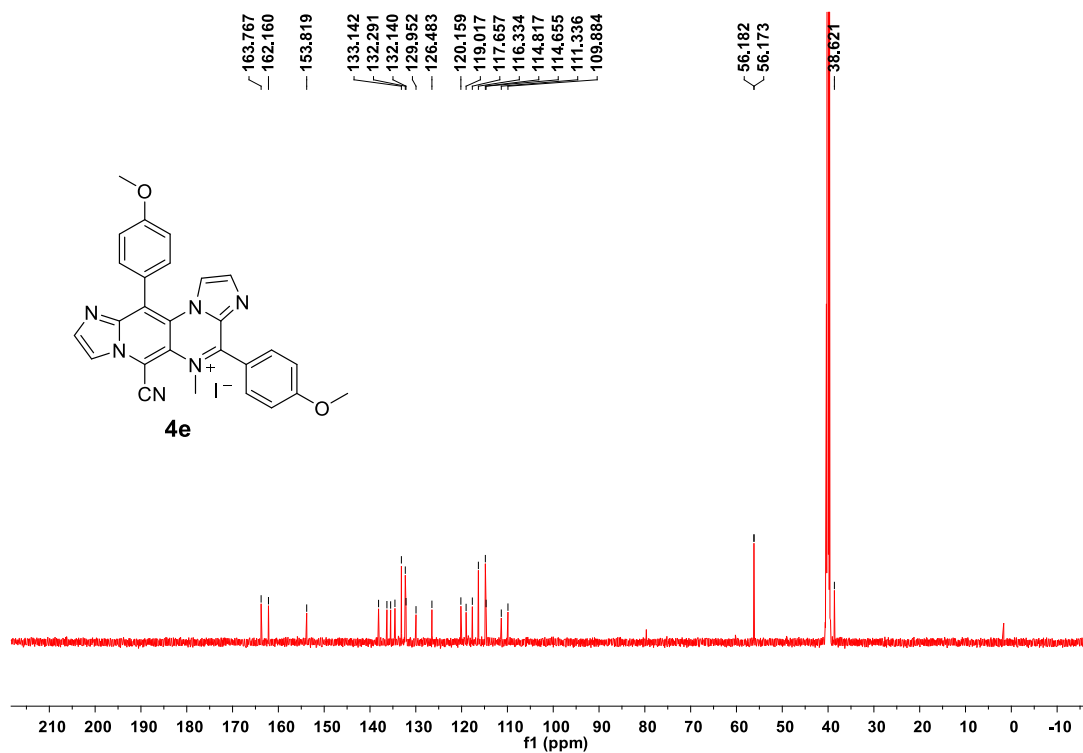

**4,11-Bis(4-(tert-butyl)phenyl)-6-cyano-5-methylimidazo[1',2':1,6]pyrido[3,4-e]imidazo[1,2-a]pyrazin-5-ium iodide (4f)**

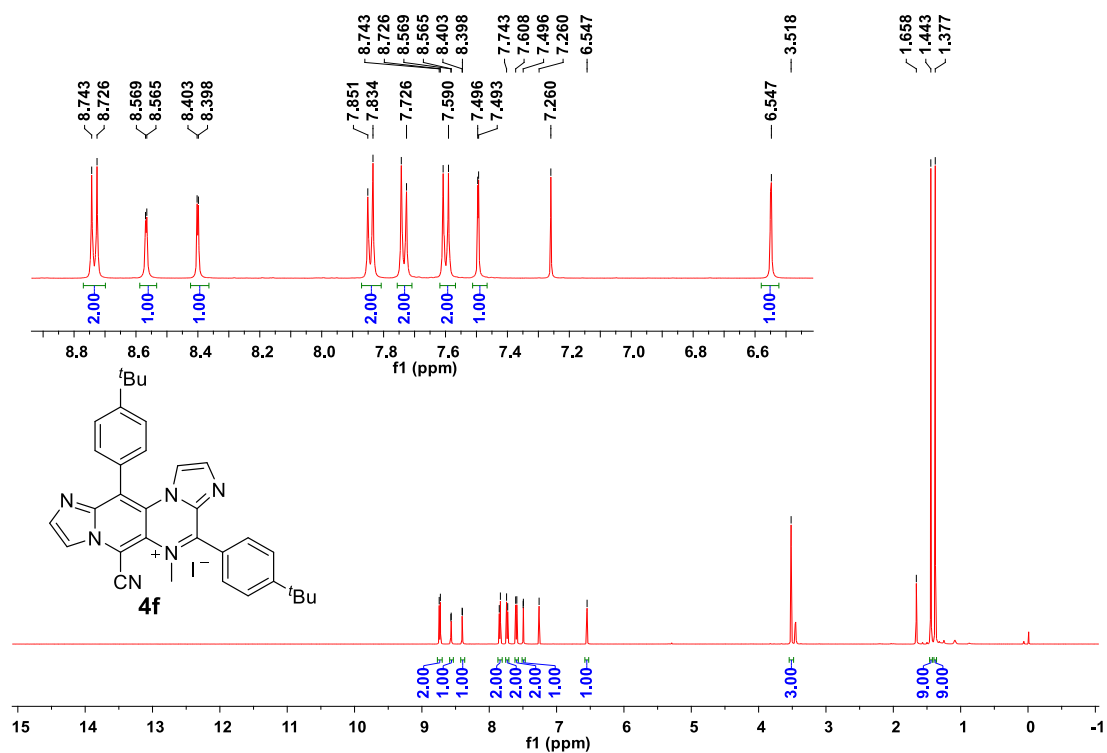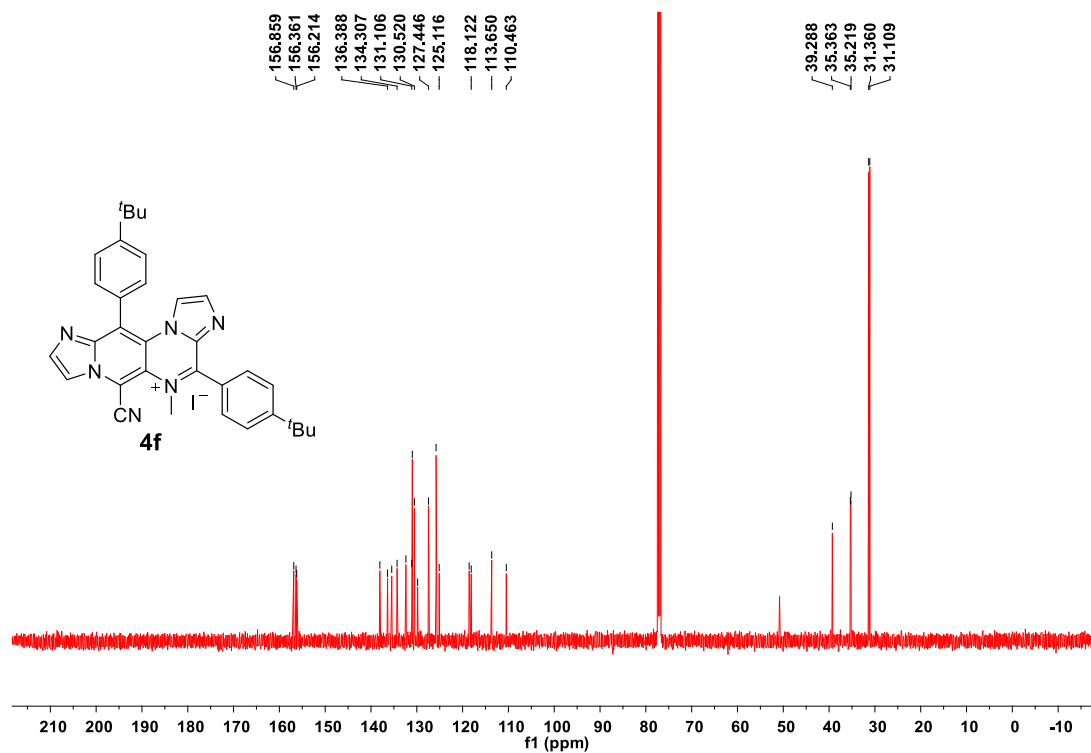

**6-Cyano-5-methyl-4,11-di-m-tolylimidazo[1',2':1,6]pyrido[3,4-e]imidazo[1,2-a]pyrazin-5-ium  
iodide (4g)**

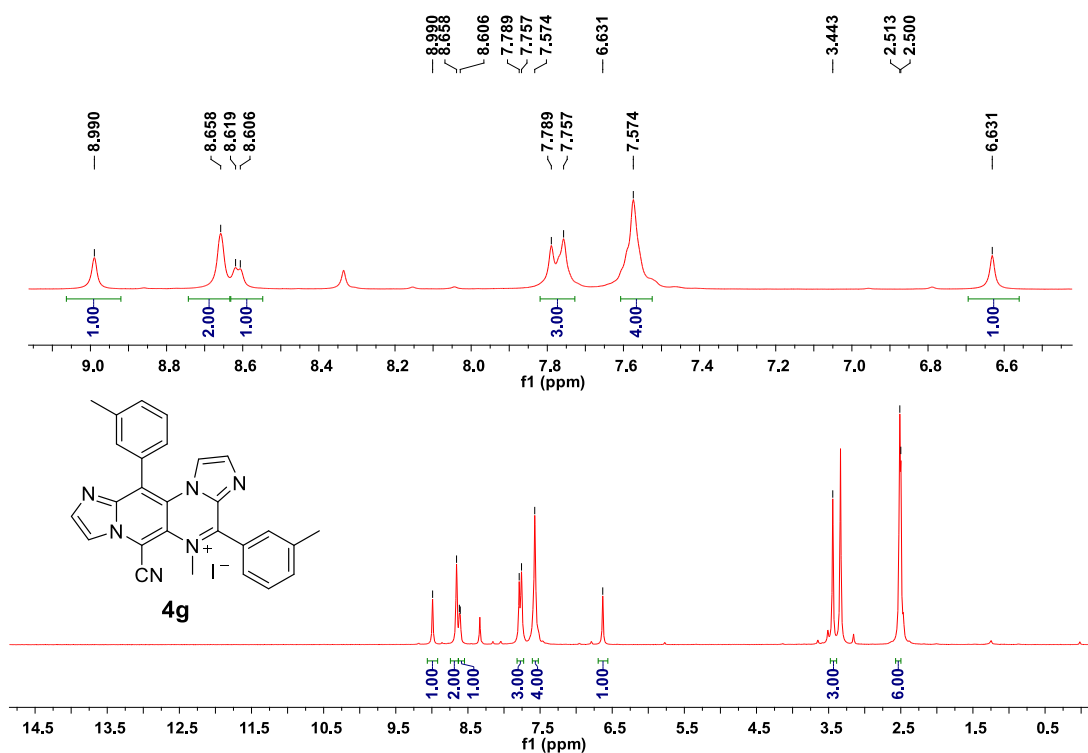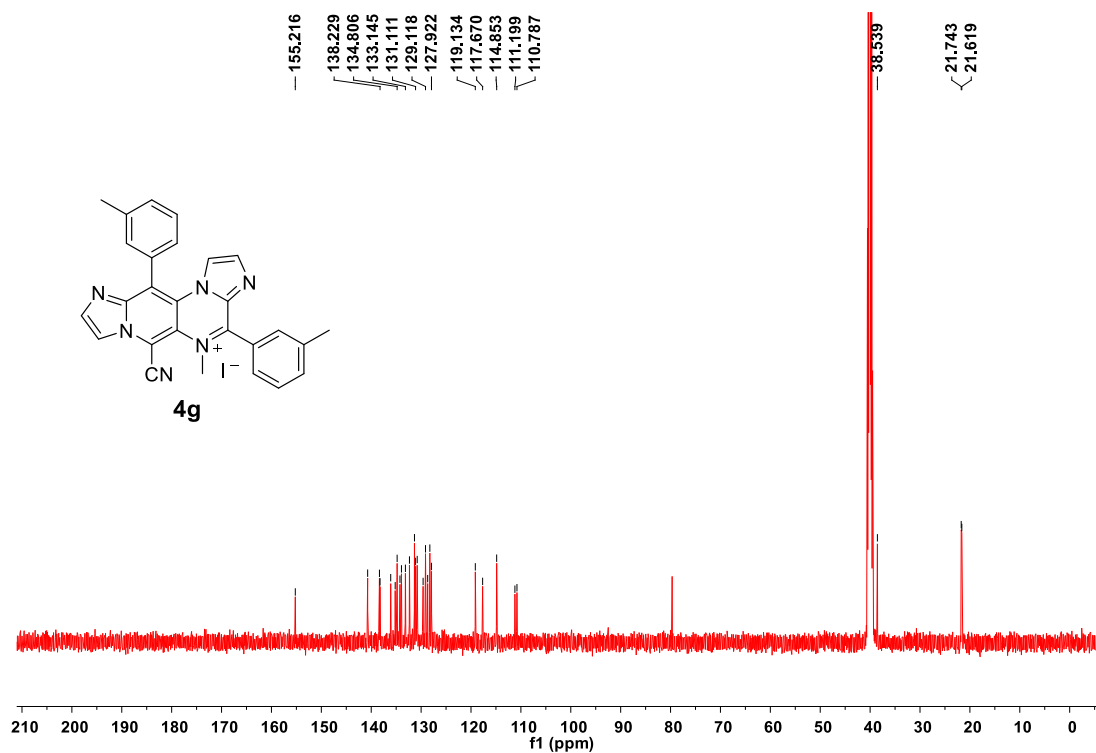

**4,11-Bis(4-(tert-butyl)phenyl)-6-cyano-5-ethylimidazo[1',2':1,6]pyrido[3,4-e]imidazo[1,2-a]pyrazin-5-ium iodide (5a)**

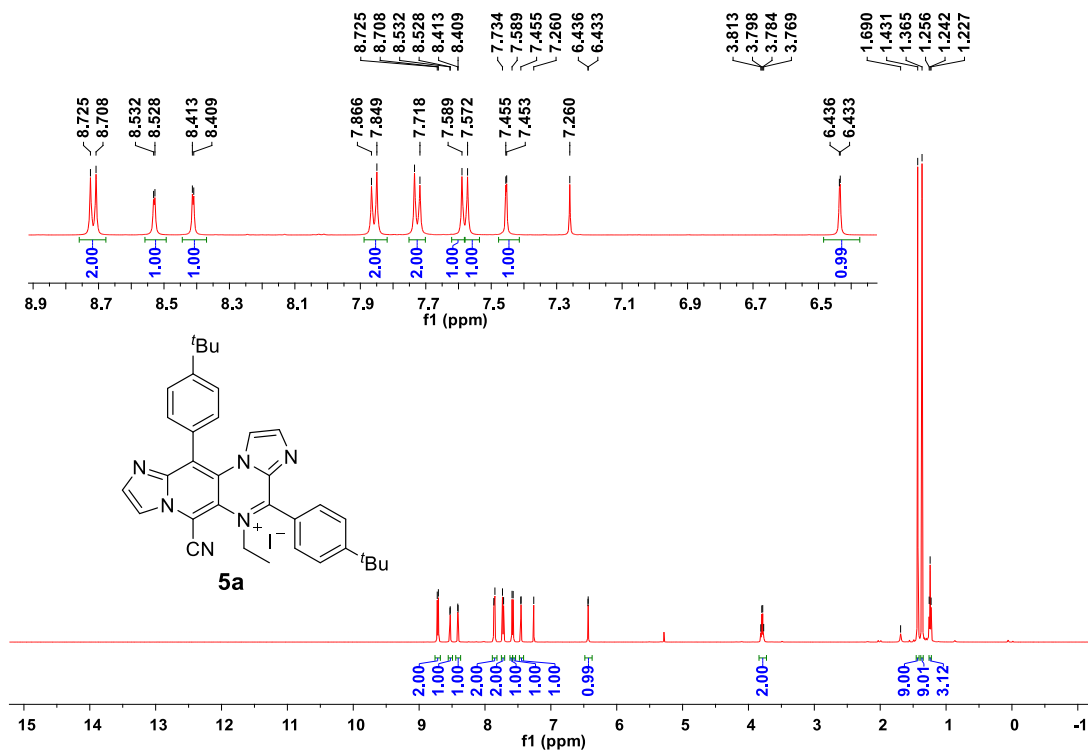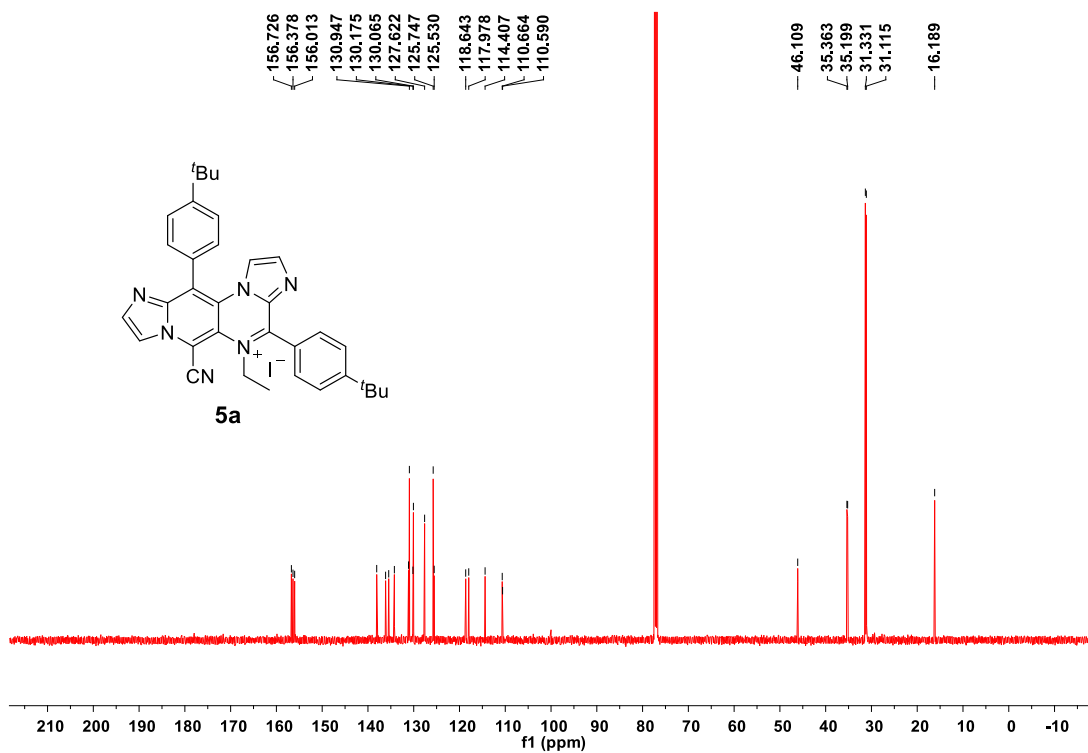

**4,11-Bis(4-(tert-butyl)phenyl)-6-cyano-5-propylimidazo[1',2':1,6]pyrido[3,4-e]imidazo[1,2-a]pyrazin-5-ium iodide (5b)**

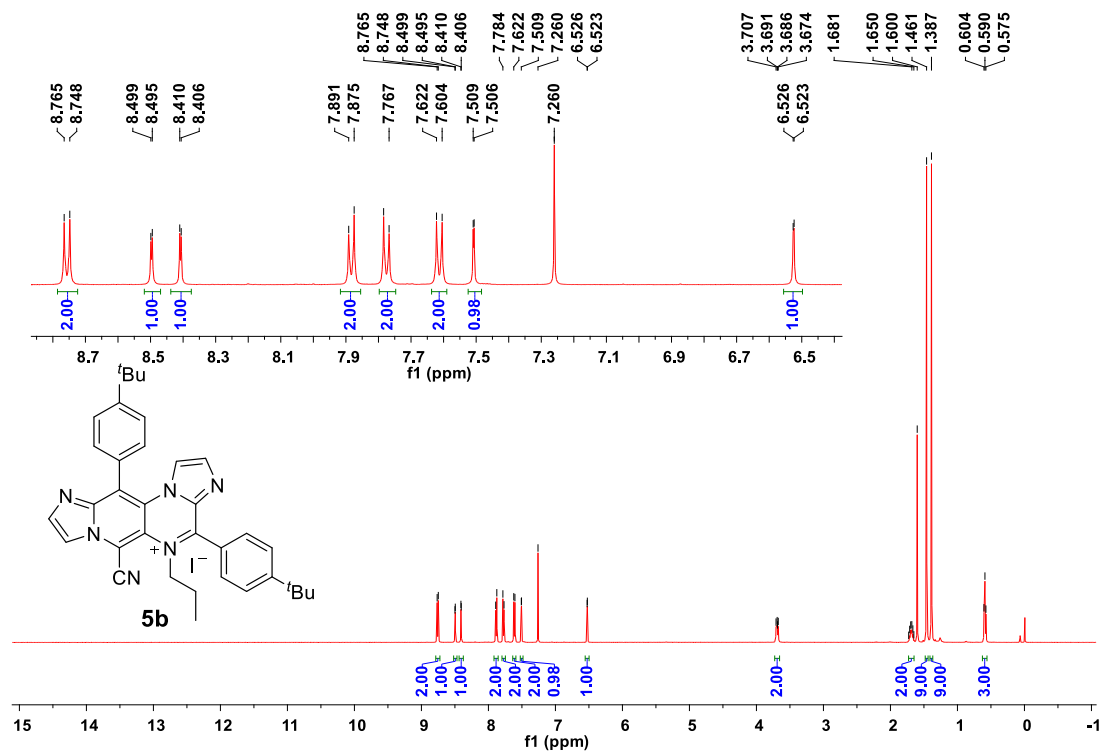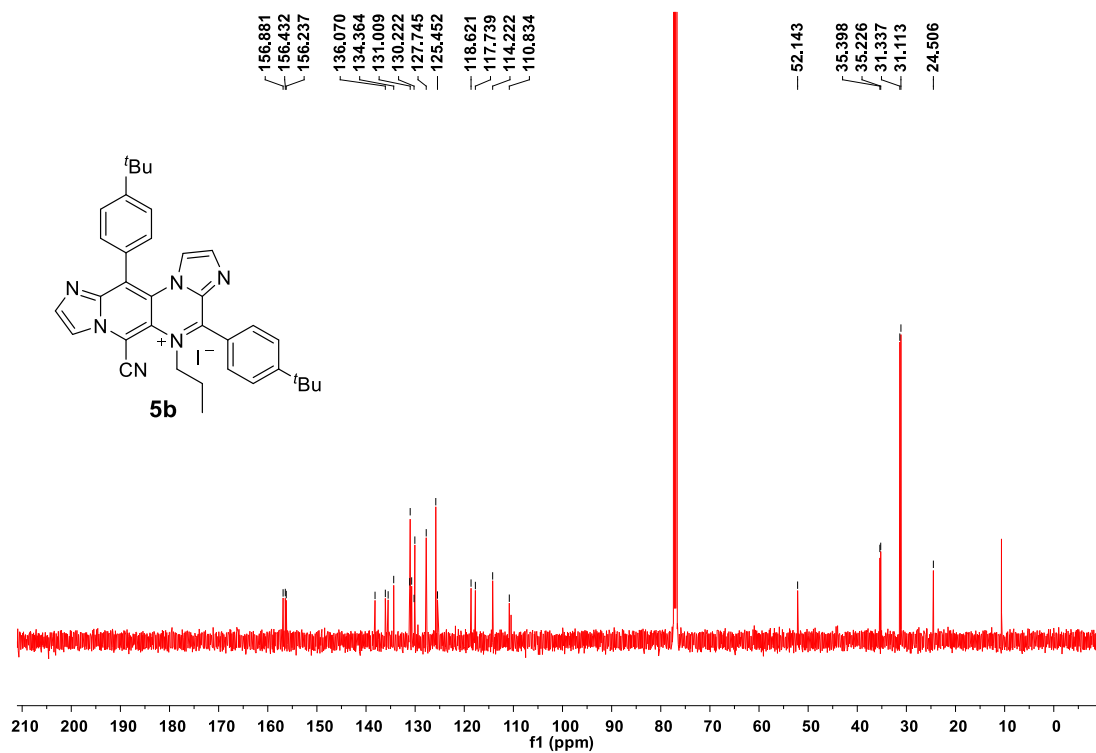

**5-Allyl-4,11-bis(4-(tert-butyl)phenyl)-6-cyanoimidazo[1',2':1,6]pyrido[3,4-e]imidazo[1,2-a]pyrazin-5-ium iodide (5c)**

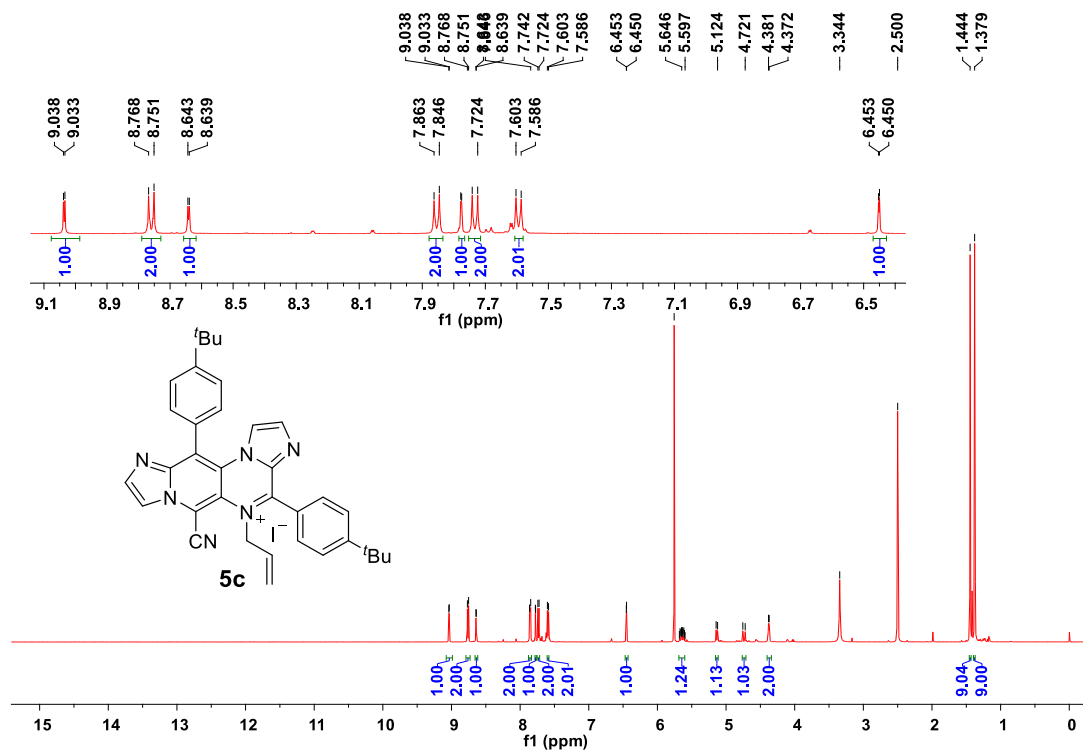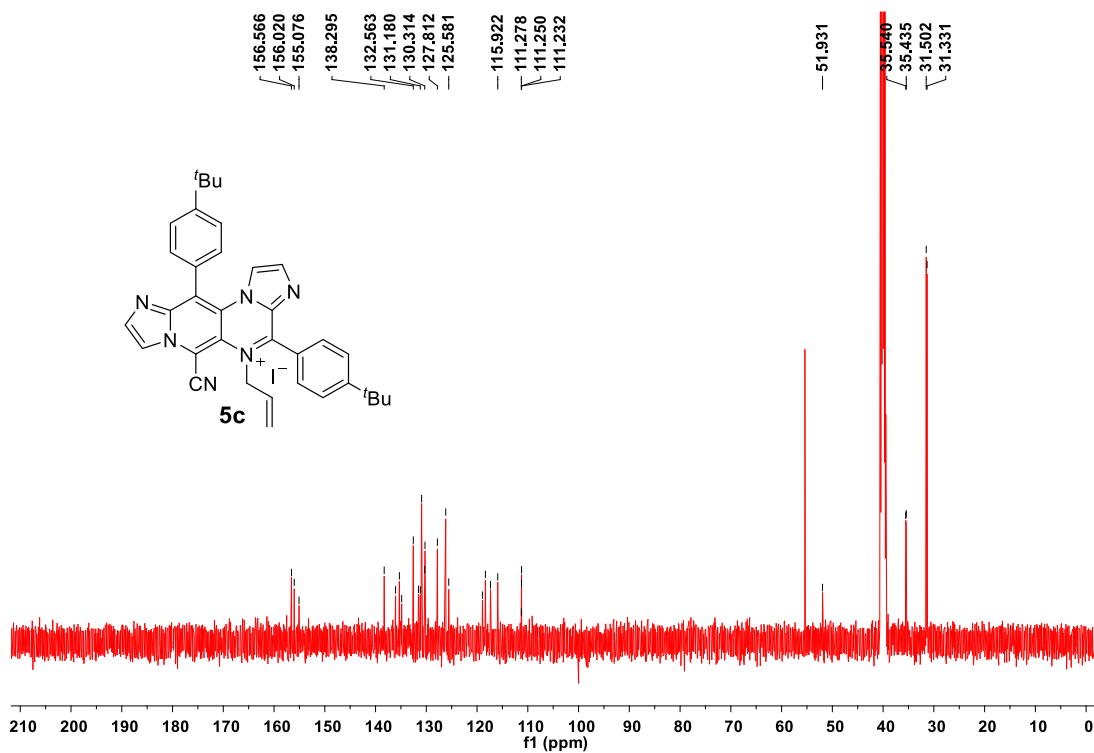

5-(But-3-yn-1-yl)-4,11-bis(4-(tert-butyl)phenyl)-6-cyanoimidazo[1',2':1,6]pyrido[3,4-e]imidazo[1,2-a]pyrazin-5-ium (5d)

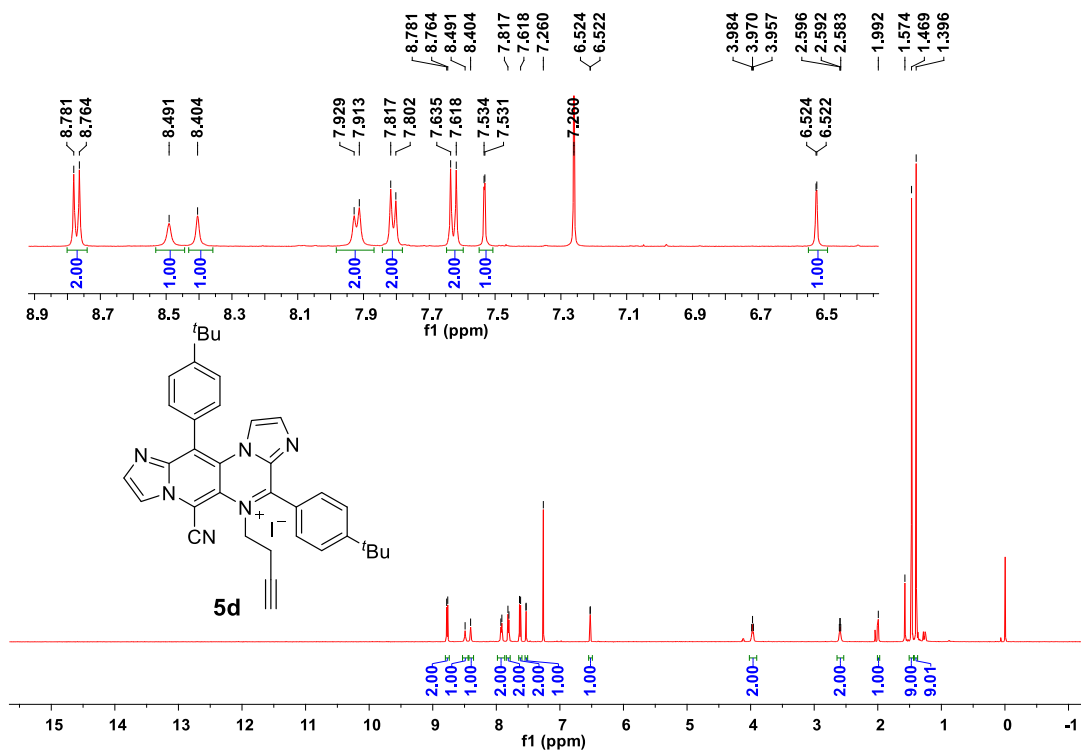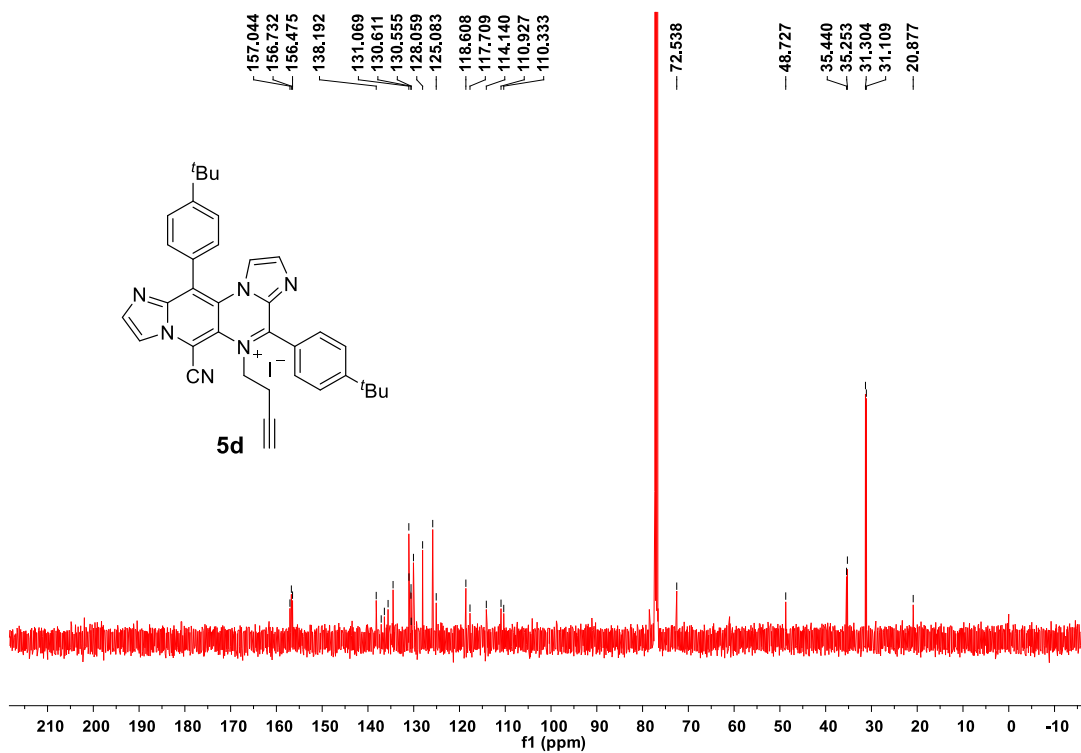

**4,11-Bis(4-(tert-butyl)phenyl)-6-cyano-5-(pent-4-yn-1-yl)imidazo[1',2':1,6]pyrido[3,4-e]imidazo[1,2-a]pyrazin-5-ium iodide (5e)**

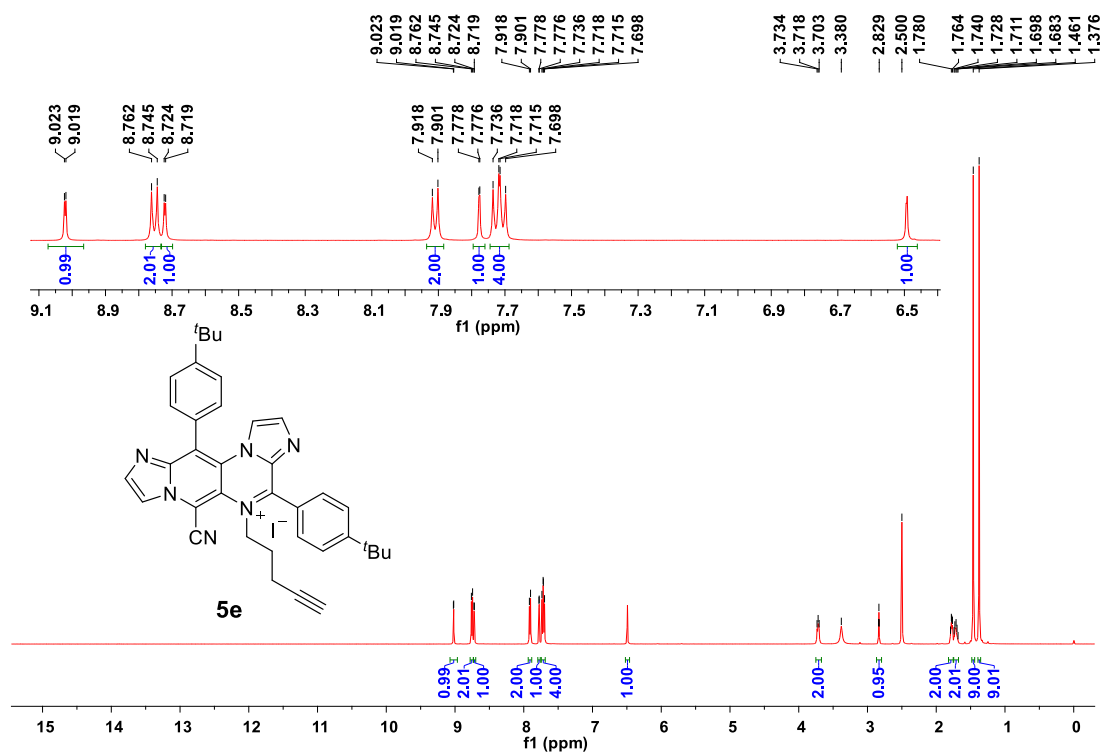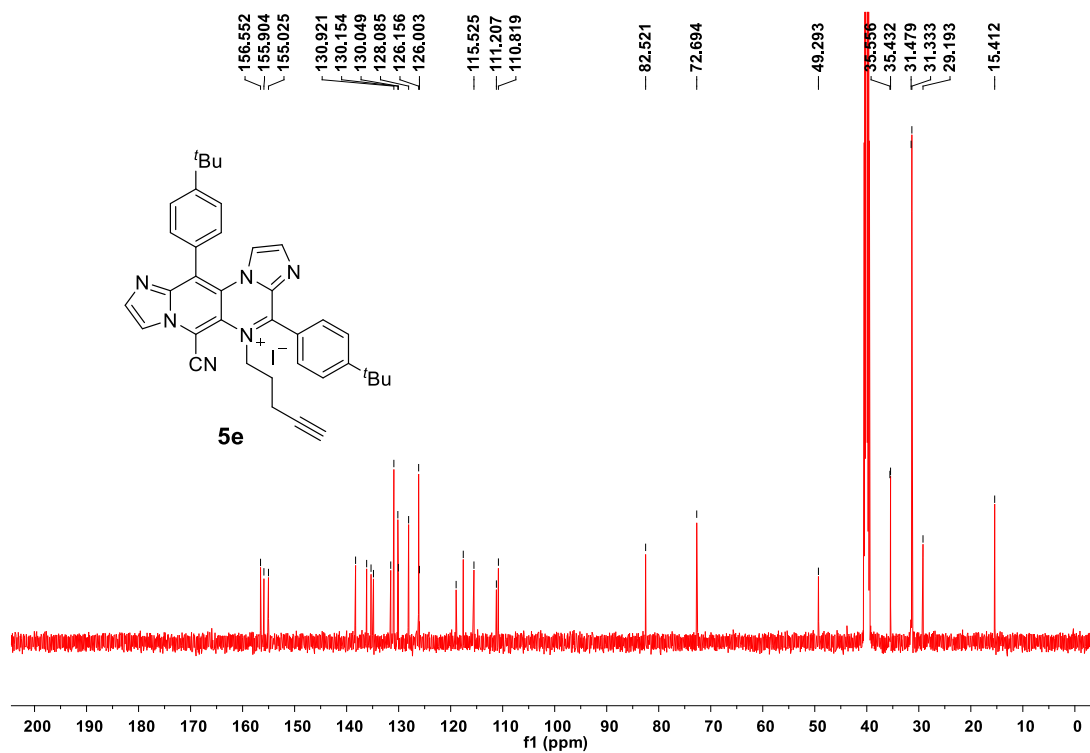

**4,11-Bis(4-(tert-butyl)phenyl)-6-cyano-5-(2-hydroxyethyl)imidazo[1',2':1,6]pyrido[3,4-e]imidazo[1,2-a]pyrazin-5-ium iodide (5f)**

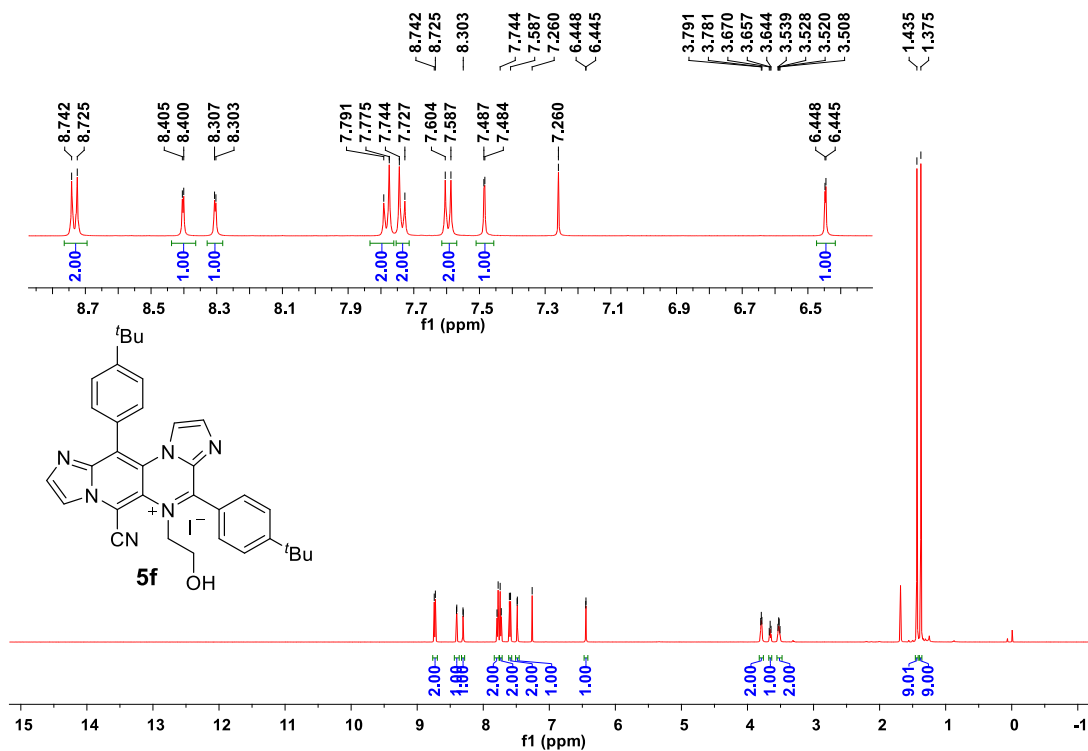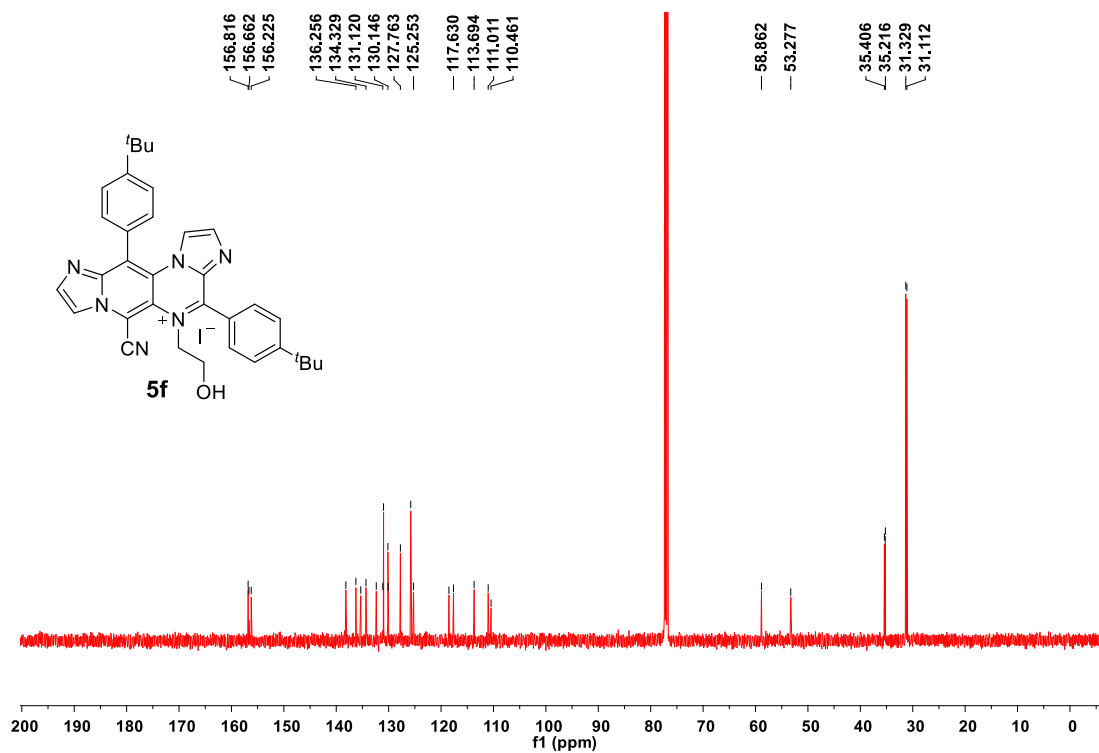

**2-(4,11-Bis(4-(tert-butyl)phenyl)-6-cyanoimidazo[1',2':1,6]pyrido[3,4-e]imidazo[1,2-a]pyrazin-5-ium-5-yl)ethane-1-sulfonate (5g)**

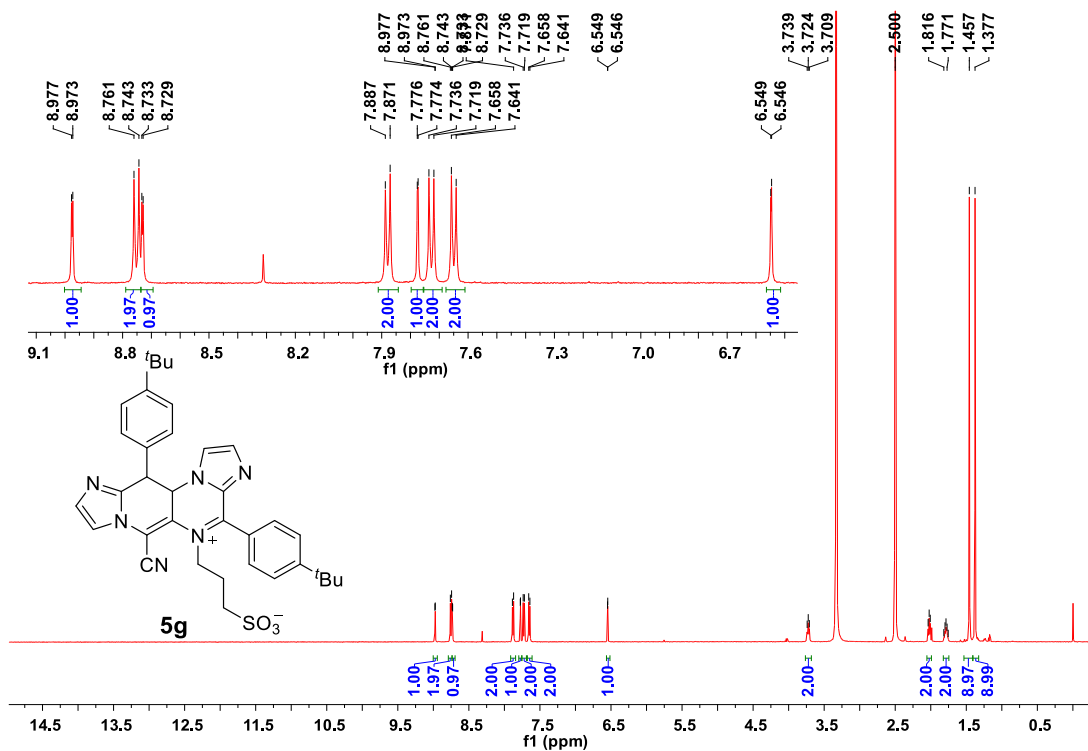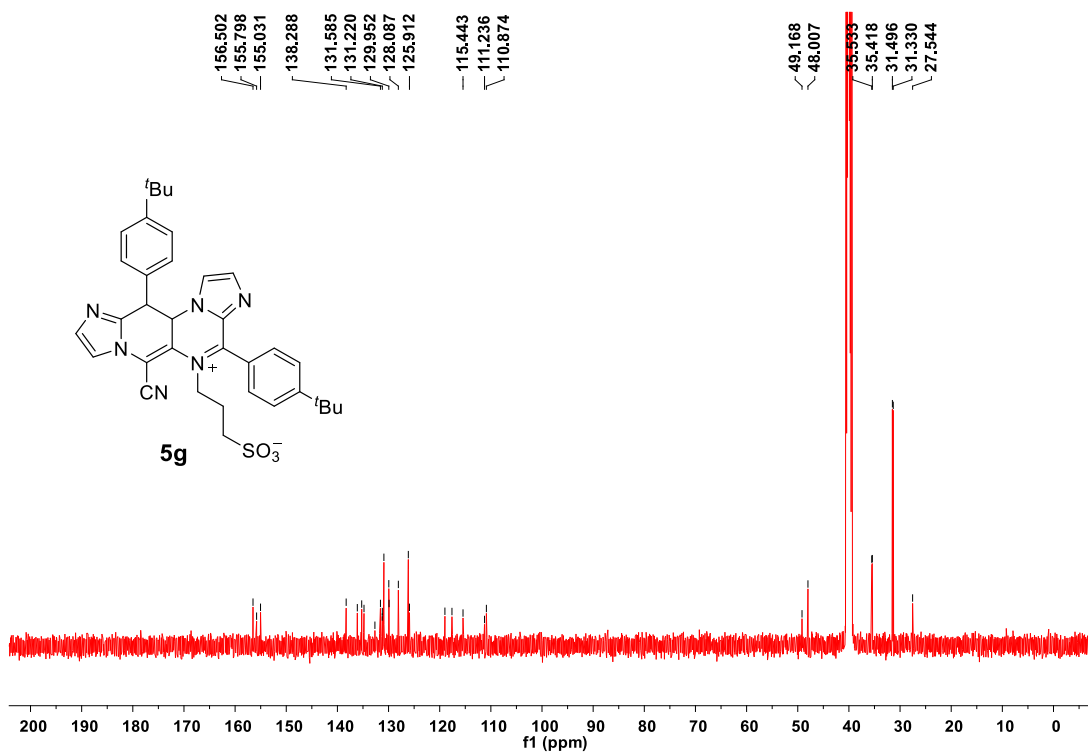

**4,11-Bis(4-(tert-butyl)phenyl)-6-cyano-5-(2-oxopropyl)imidazo[1',2':1,6]pyrido[3,4-e]imidazo[1,2-a]pyrazin-5-ium bromide (5h)**

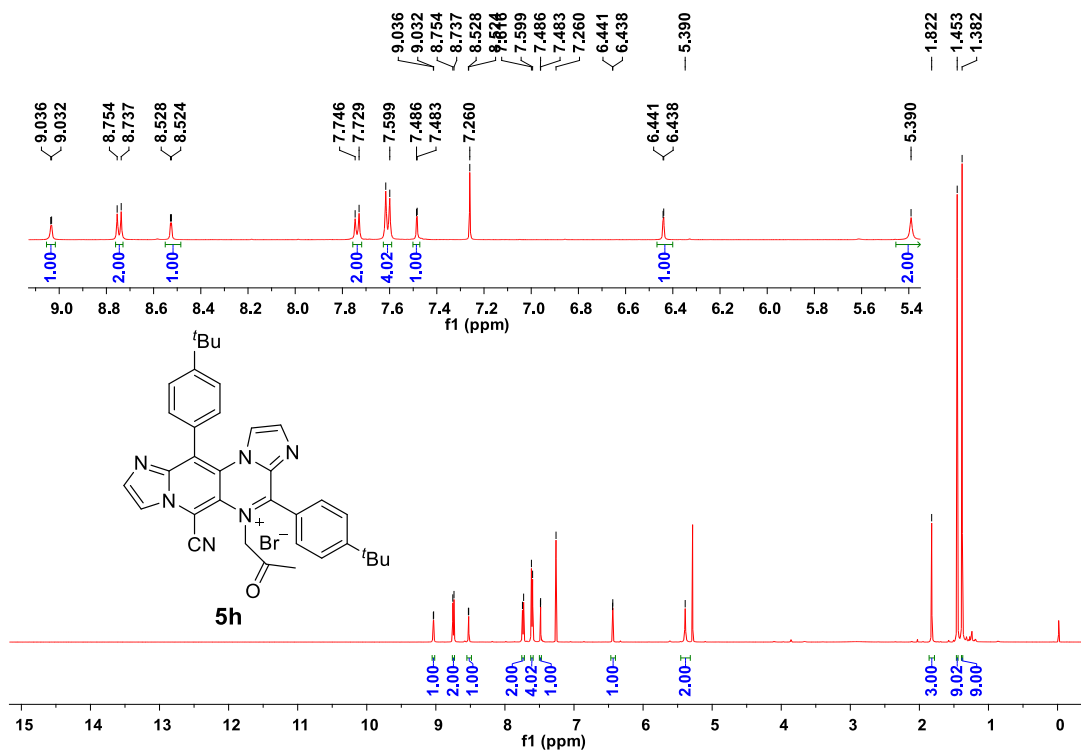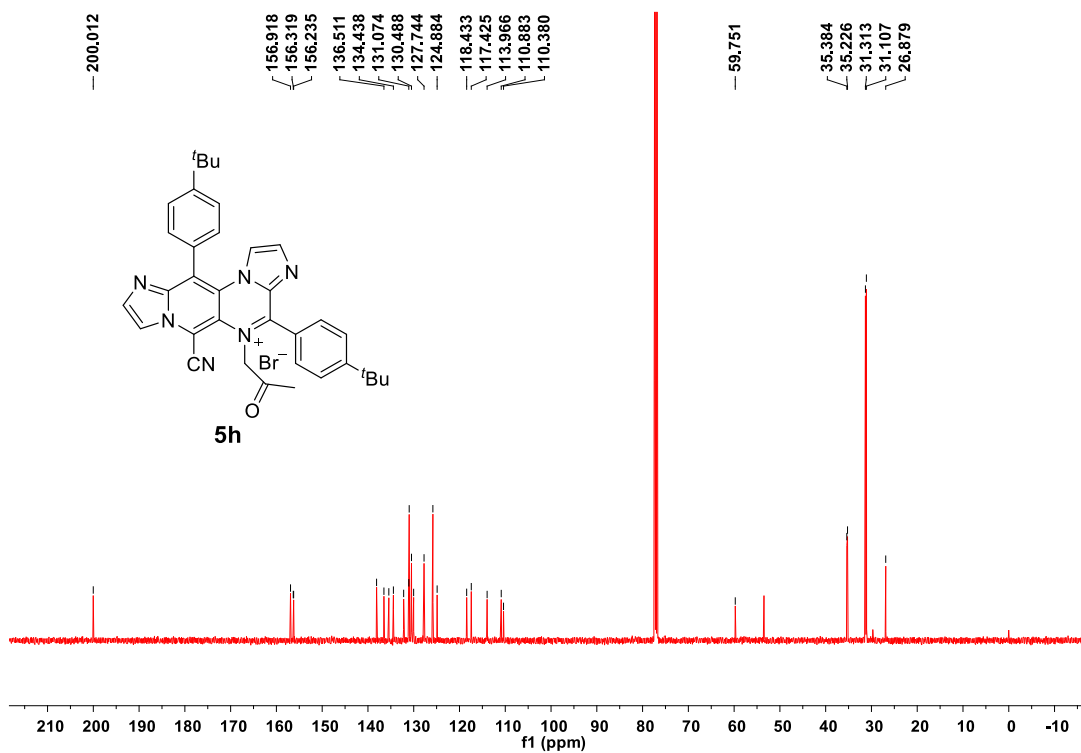

**4,11-Bis(4-(tert-butyl)phenyl)-6-cyano-5-(2-ethoxy-2-oxoethyl)imidazo[1',2':1,6]pyrido[3,4-e]imidazo[1,2-a]pyrazin-5-ium bromide (5i)**

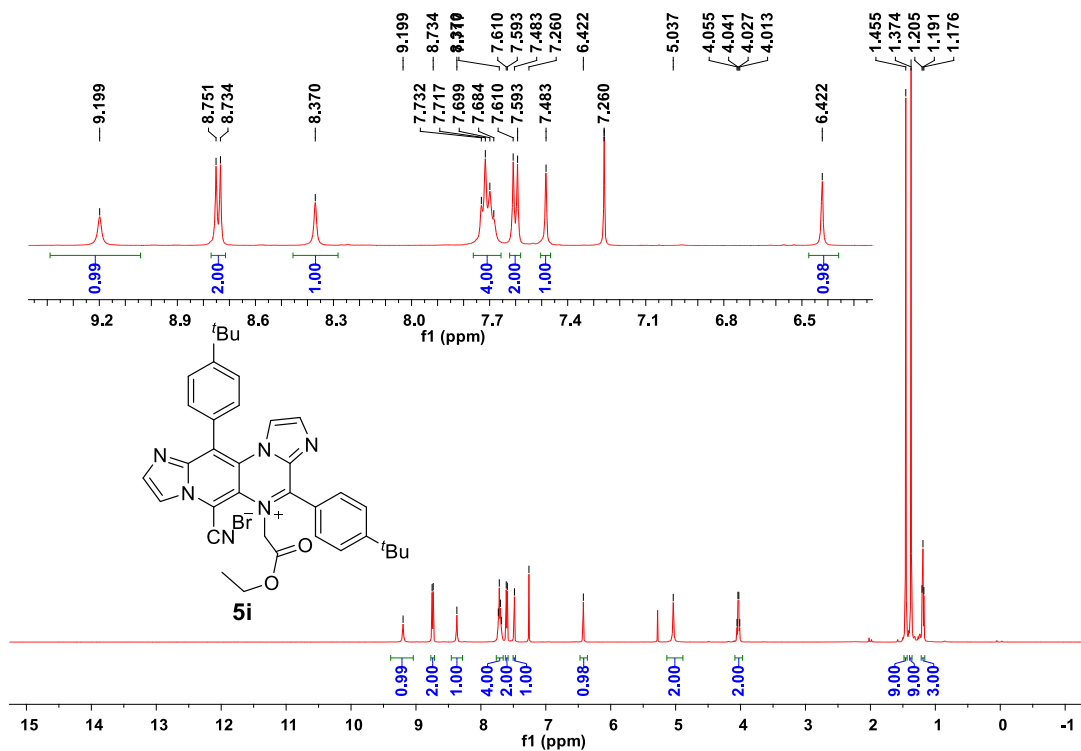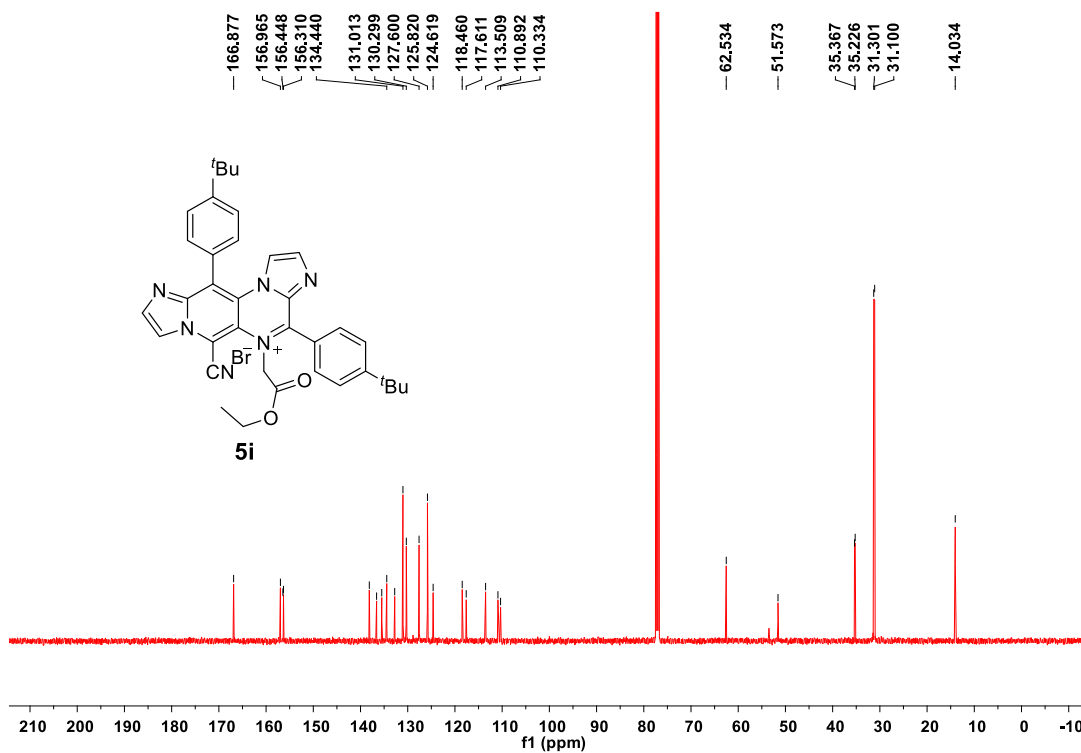

**Chemical structure of 5j:** Cc1ccc(cc1)[N+]2=C(C#N)N3C=CC=C3N2C(=C4C=CC(=C4)C)CCCCCCCCCCCCCCCC

**<sup>1</sup>H NMR (CDCl<sub>3</sub>) peaks (ppm):** 8.748, 8.731, 8.456, 8.440, 7.890, 7.874, 7.740, 7.607, 7.590, 7.478, 7.260, 6.500, 3.731, 3.715, 3.698, 1.666, 1.627, 1.448, 1.378, 1.245, 1.108, 0.880, 0.867, 0.853.

**<sup>13</sup>C NMR (CDCl<sub>3</sub>) peaks (ppm):** 154.1, 149.0, 148.9, 148.8, 148.7, 148.6, 148.5, 148.4, 148.3, 148.2, 148.1, 148.0, 147.9, 147.8, 147.7, 147.6, 147.5, 147.4, 147.3, 147.2, 147.1, 147.0, 146.9, 146.8, 146.7, 146.6, 146.5, 146.4, 146.3, 146.2, 146.1, 146.0, 145.9, 145.8, 145.7, 145.6, 145.5, 145.4, 145.3, 145.2, 145.1, 145.0, 144.9, 144.8, 144.7, 144.6, 144.5, 144.4, 144.3, 144.2, 144.1, 144.0, 143.9, 143.8, 143.7, 143.6, 143.5, 143.4, 143.3, 143.2, 143.1, 143.0, 142.9, 142.8, 142.7, 142.6, 142.5, 142.4, 142.3, 142.2, 142.1, 142.0, 141.9, 141.8, 141.7, 141.6, 141.5, 141.4, 141.3, 141.2, 141.1, 141.0, 140.9, 140.8, 140.7, 140.6, 140.5, 140.4, 140.3, 140.2, 140.1, 140.0, 139.9, 139.8, 139.7, 139.6, 139.5, 139.4, 139.3, 139.2, 139.1, 139.0, 138.9, 138.8, 138.7, 138.6, 138.5, 138.4, 138.3, 138.2, 138.1, 138.0, 137.9, 137.8, 137.7, 137.6, 137.5, 137.4, 137.3, 137.2, 137.1, 137.0, 136.9, 136.8, 136.7, 136.6, 136.5, 136.4, 136.3, 136.2, 136.1, 136.0, 135.9, 135.8, 135.7, 135.6, 135.5, 135.4, 135.3, 135.2, 135.1, 135.0, 134.9, 134.8, 134.7, 134.6, 134.5, 134.4, 134.3, 134.2, 134.1, 134.0, 133.9, 133.8, 133.7, 133.6, 133.5, 133.4, 133.3, 133.2, 133.1, 133.0, 132.9, 132.8, 132.7, 132.6, 132.5, 132.4, 132.3, 132.2, 132.1, 132.0, 131.9, 131.8, 131.7, 131.6, 131.5, 131.4, 131.3, 131.2, 131.1, 131.0, 130.9, 130.8, 130.7, 130.6, 130.5, 130.4, 130.3, 130.2, 130.1, 130.0, 129.9, 129.8, 129.7, 129.6, 129.5, 129.4, 129.3, 129.2, 129.1, 129.0, 128.9, 128.8, 128.7, 128.6, 128.5, 128.4, 128.3, 128.2, 128.1, 128.0, 127.9, 127.8, 127.7, 127.6, 127.5, 127.4, 127.3, 127.2, 127.1, 127.0, 126.9, 126.8, 126.7, 126.6, 126.5, 126.4, 126.3, 126.2, 126.1, 126.0, 125.9, 125.8, 125.7, 125.6, 125.5, 125.4, 125.3, 125.2, 125.1, 125.0, 124.9, 124.8, 124.7, 124.6, 124.5, 124.4, 124.3, 124.2, 124.1, 124.0, 123.9, 123.8, 123.7, 123.6, 123.5, 123.4, 123.3, 123.2, 123.1, 123.0, 122.9, 122.8, 122.7, 122.6, 122.5, 122.4, 122.3, 122.2, 122.1, 122.0, 121.9, 121.8, 121.7, 121.6, 121.5, 121.4, 121.3, 121.2, 121.1, 121.0, 120.9, 120.8, 120.7, 120.6, 120.5, 120.4, 120.3, 120.2, 120.1, 120.0, 119.9, 119.8, 119.7, 119.6, 119.5, 119.4, 119.3, 119.2, 119.1, 119.0, 118.9, 118.8, 118.7, 118.6, 118.5, 118.4, 118.3, 118.2, 118.1, 118.0, 117.9, 117.8, 117.7, 117.6, 117.5, 117.4, 117.3, 117.2, 117.1, 117.0, 116.9, 116.8, 116.7, 116.6, 116.5, 116.4, 116.3, 116.2, 116.1, 116.0, 115.9, 115.8, 115.7, 115.6, 115.5, 115.4, 115.3, 115.2, 115.1, 115.0, 114.9, 114.8, 114.7, 114.6, 114.5, 114.4, 114.3, 114.2, 114.1, 114.0, 113.9, 113.8, 113.7, 113.6, 113.5, 113.4, 113.3, 113.2, 113.1, 113.0, 112.9, 112.8, 112.7, 112.6, 112.5, 112.4, 112.3, 112.2, 112.1, 112.0, 111.9, 111.8, 111.7, 111.6, 111.5, 111.4, 111.3, 111.2, 111.1, 111.0, 110.9, 110.8, 110.7, 110.6, 110.5, 110.4, 110.3, 110.2, 110.1, 110.0, 109.9, 109.8, 109.7, 109.6, 109.5, 109.4, 109.3, 109.2, 109.1, 109.0, 108.9, 108.8, 108.7, 108.6, 108.5, 108.4, 108.3, 108.2, 108.1, 108.0, 107.9, 107.8, 107.7, 107.6, 107.5, 107.4, 107.3, 107.2, 107.1, 107.0, 106.9, 106.8, 106.7, 106.6, 106.5, 106.4, 106.3, 106.2, 106.1, 106.0, 105.9, 105.8, 105.7, 105.6, 105.5, 105.4, 105.3, 105.2, 105.1, 105.0, 104.9, 104.8, 104.7, 104.6, 104.5, 104.4, 104.3, 104.2, 104.1, 104.0, 103.9, 103.8, 103.7, 103.6, 103.5, 103.4, 103.3, 103.2, 103.1, 103.0, 102.9, 102.8, 102.7, 102.6, 102.5, 102.4, 102.3, 102.2, 102.1, 102.0, 101.9, 101.8, 101.7, 101.6, 101.5, 101.4, 101.3, 101.2, 101.1, 101.0, 100.9, 100.8, 100.7, 100.6, 100.5, 100.4, 100.3, 100.2, 100.1, 100.0, 99.9, 99.8, 99.7, 99.6, 99.5, 99.4, 99.3, 99.2, 99.1, 99.0, 98.9, 98.8, 98.7, 98.6, 98.5, 98.4, 98.3, 98.2, 98.1, 98.0, 97.9, 97.8, 97.7, 97.6, 97.5, 97.4, 97.3, 97.2, 97.1, 97.0, 96.9, 96.8, 96.7, 96.6, 96.5, 96.4, 96.3, 96.2, 96.1, 96.0, 95.9, 95.8, 95.7, 95.6, 95

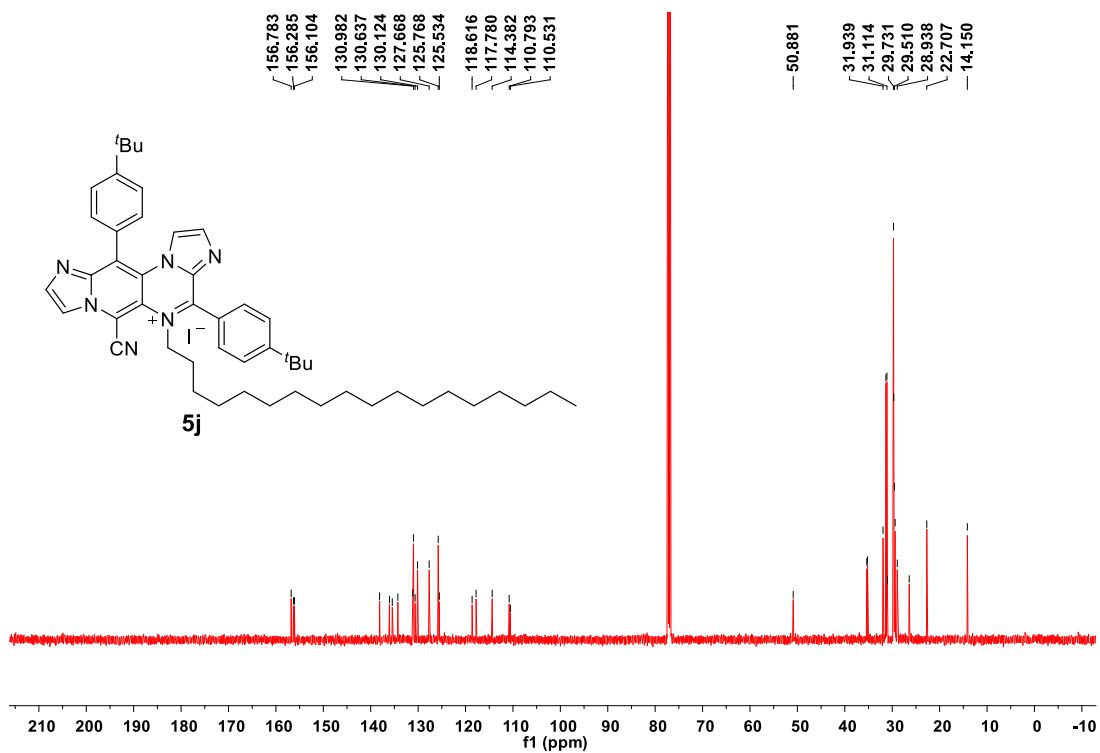

**4,11-Bis(4-(tert-butyl)phenyl)-6-cyano-5-(2-morpholinoethyl)imidazo[1',2':1,6]pyrido[3,4-e]imidazo[1,2-a]pyrazin-5-ium iodide (5k)**

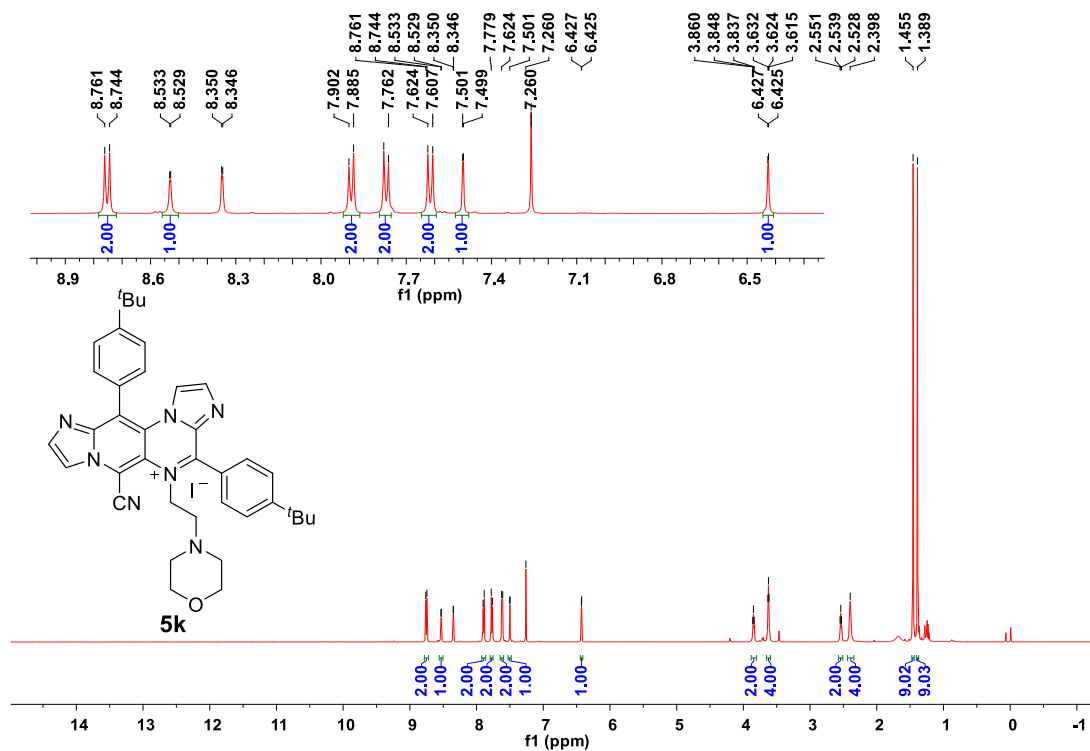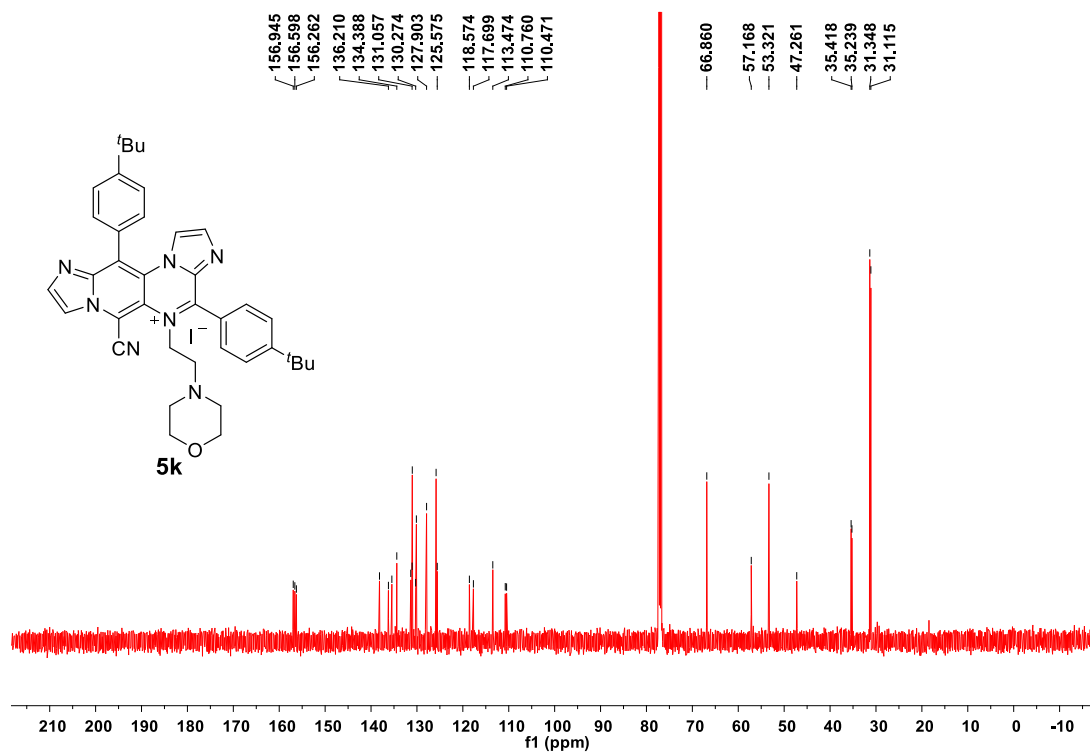

**4,11-Bis(4-(tert-butyl)phenyl)-6-cyano-5-(4-(triphenylphosphonio)butyl)imidazo[1',2':1,6]pyrido[3,4-e]imidazo[1,2-a]pyrazin-5-ium iodide (51)**

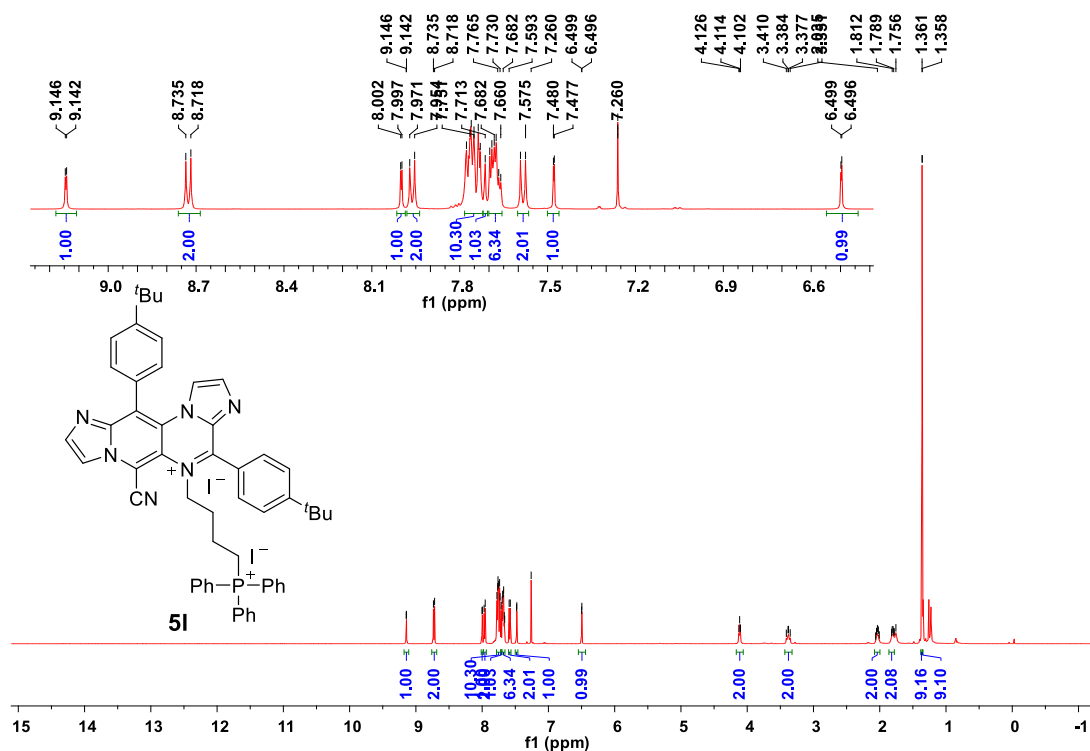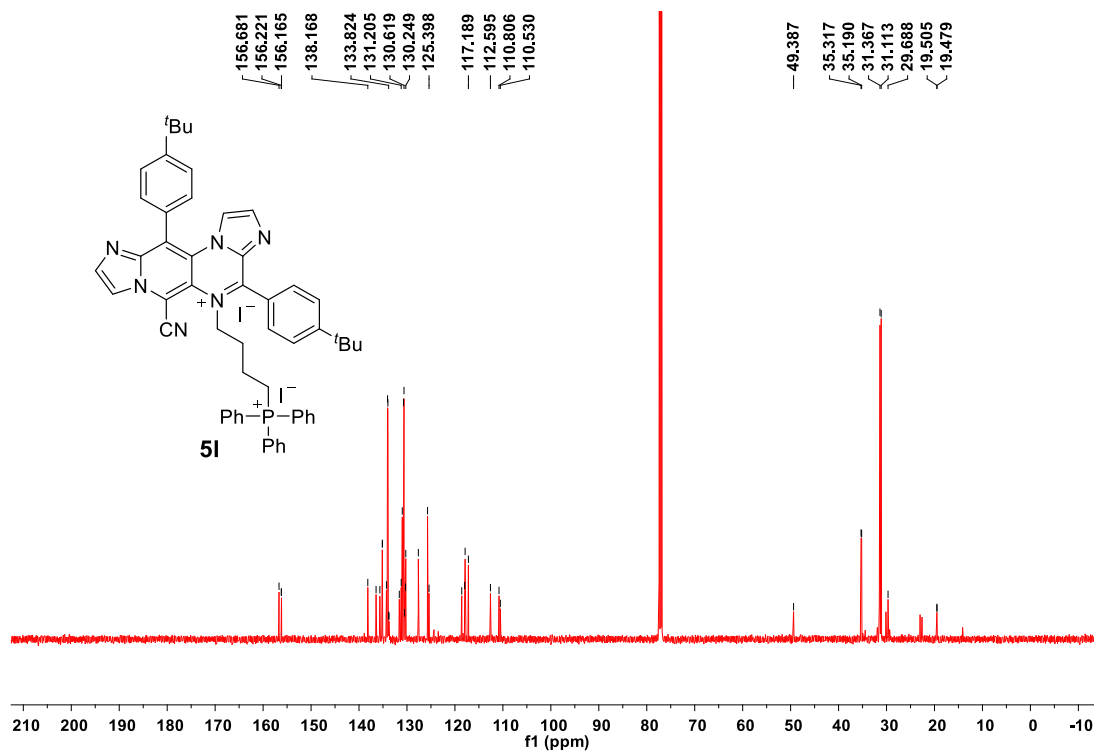

**1-(Tert-butyl)-4-(11-(4-(tert-butyl)phenyl)-5,6-dihydro-7H-4-oxa-1,3a,6a,8,10a-pentaazadicyclopenta[a,e]phenalen-7-ylidene)cyclohexa-2,5-dien-1-ol (6)**

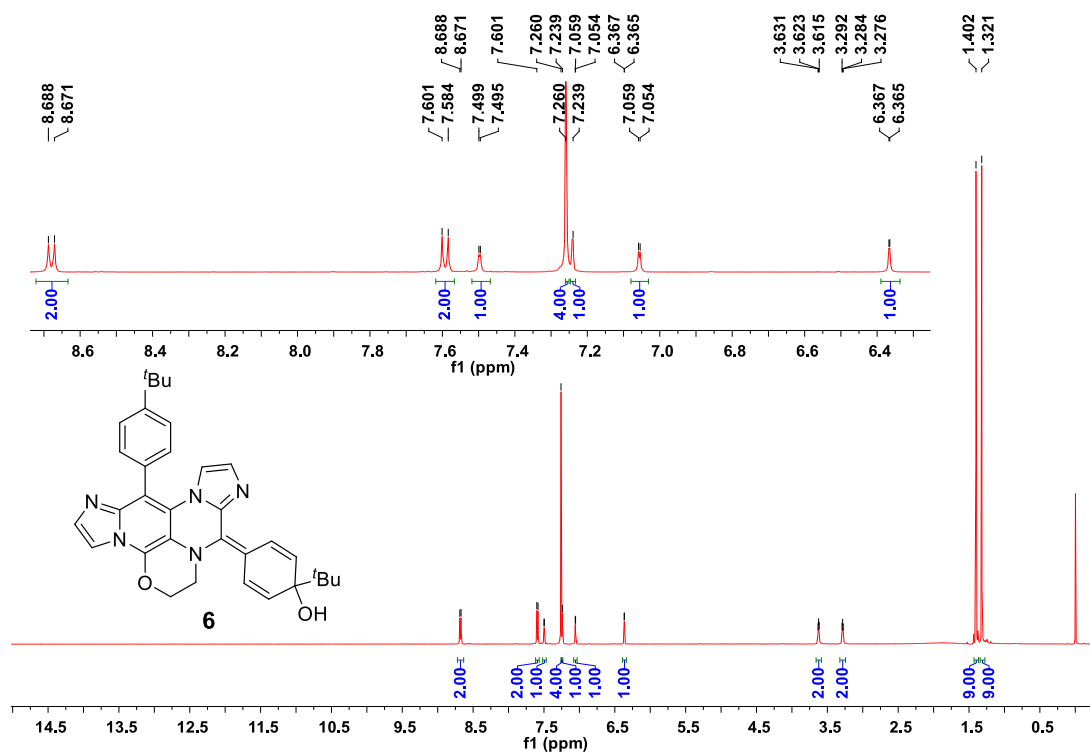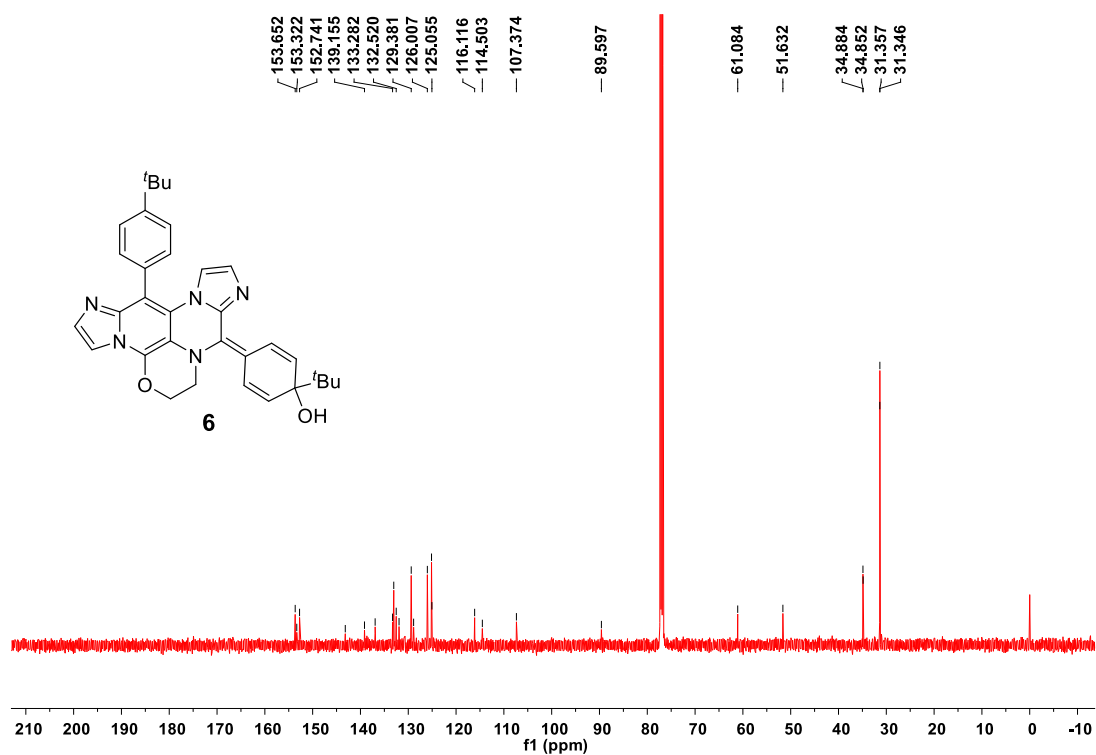

**Pyrrolo[1',2':4,5]pyrazino[2,3-f]indolizine-6-carbonitrile (2k)**

C-2 ( $\delta$  133.9), H-4 ( $\delta$  8.62) and H-11 ( $\delta$  8.77) of **2k** were determined by  $^1\text{H}$  NMR,  $^{13}\text{C}$  NMR and HSQC. The correlation of C-7 and H-5 from HMBC showed that the intermolecular aldol cyclization of **2k** might be the first step. The correlation of C-7 and H-10 from HMBC showed further aldimine condensation.

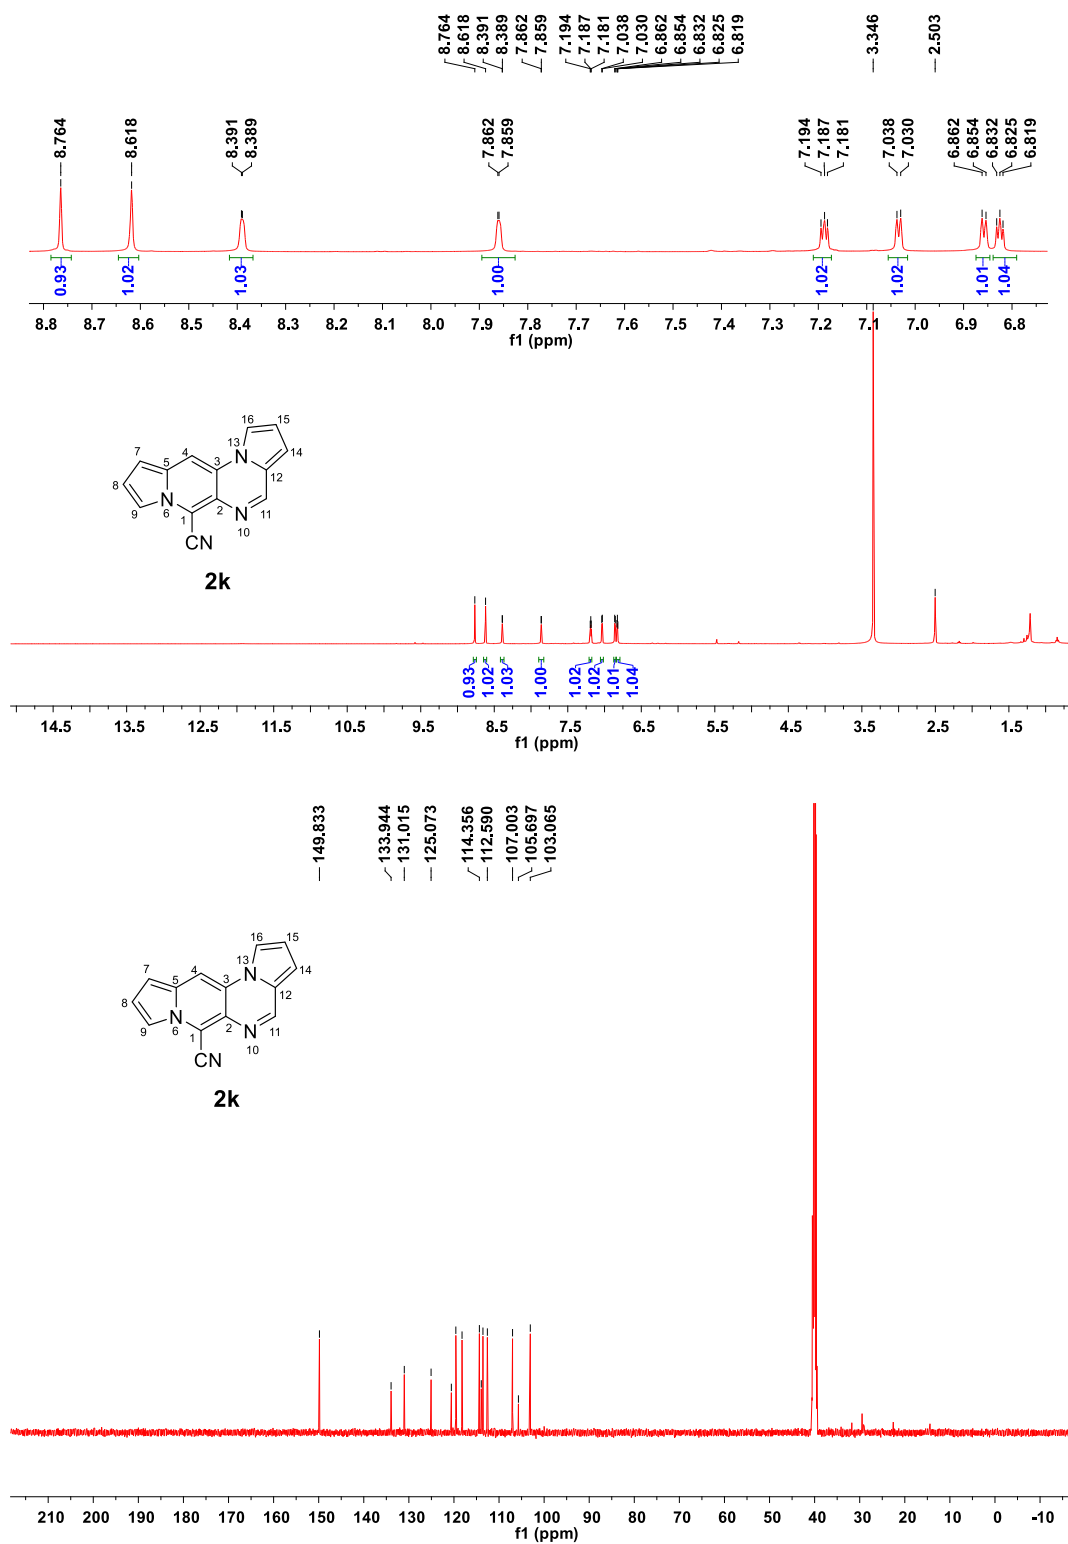

# HSQC of **2k**

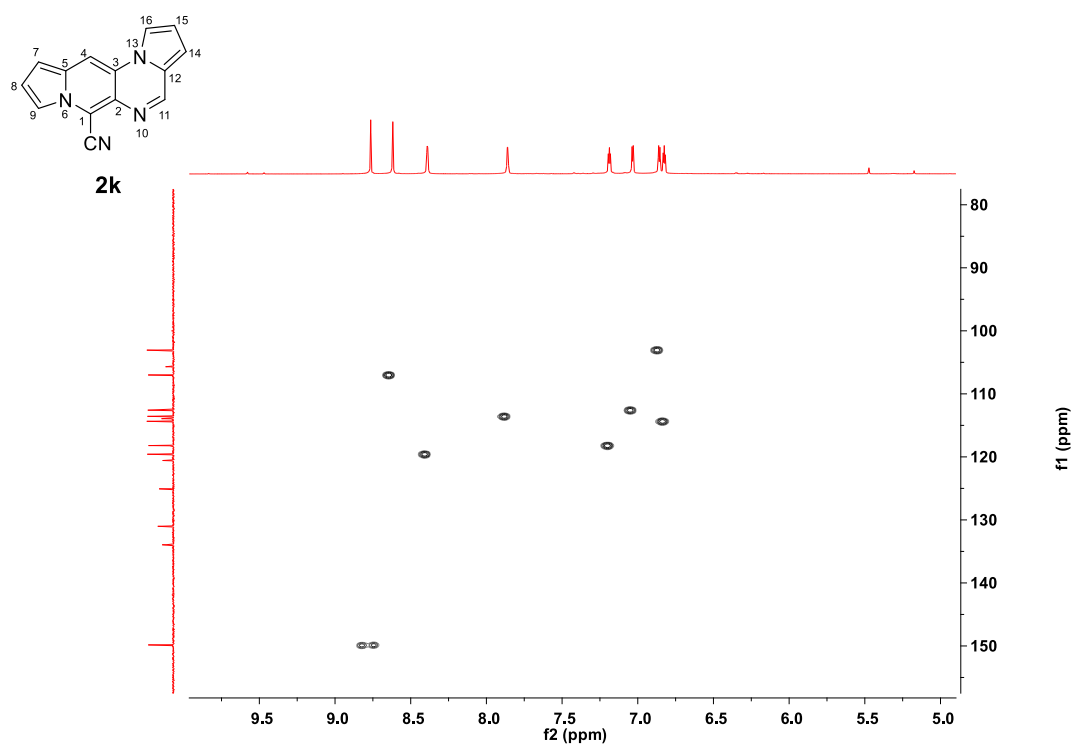

# HMBC of **2k**

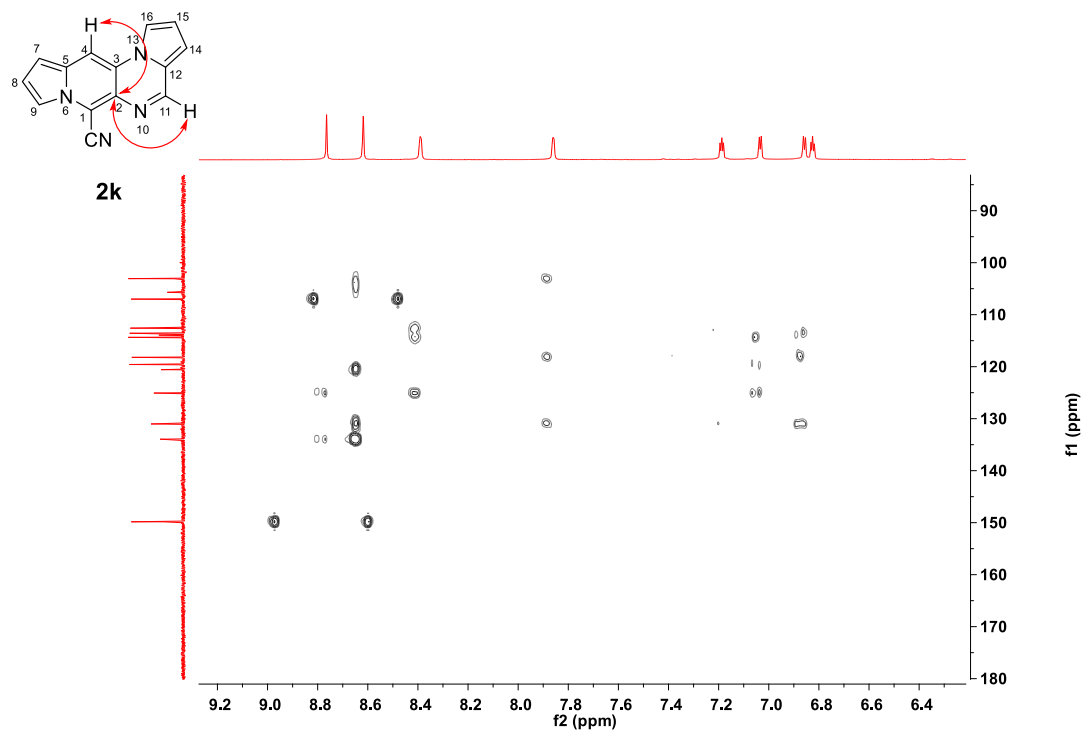

Supplement: d3sc03921h1.pdf [file d3sc03921h1.pdf]
